# Supplementary material
Source: publisher site journal article supplement (https://www.spandidos-publications.com/4348/downloadSupplementary)
Supplement: Supplementary file 1 [file downloadSupplementary]

## Sheet: siTRAP1 0.5%O2 vs. siNEG_0.5%O2
Table SII. Differentially expressed genes.
row.names	Ill_ID	Chr	Band	Symbol	Name	EntrezID	logFC	P-value
4280017	ILMN_1669523	14	14q24.3	FOS	Fos proto-oncogene, AP-1 transcription factor subunit	2353	-2.16412	9.06942e-07
4670092	ILMN_1699737	16	16p13.3	TRAP1	TNF receptor associated protein 1	10131	-2.09549	1.98648e-13
610451	ILMN_1659047	NA	NA	NA	NA		-2.08612	9.11099e-05
4290148	ILMN_3242900	NA	NA	NA	NA		-1.99149	0.000202833
6100022	ILMN_1768973	1	1q21.2	HIST2H2AC	histone cluster 2 H2A family member c	8338	-1.81713	0.000278723
4200037	ILMN_1689842	4	4q32.3	MSMO1	methylsterol monooxygenase 1	6307	-1.81086	8.86245e-06
1820592	ILMN_2144426	NA	NA	NA	NA		-1.55704	0.00700877
2030678	ILMN_1747589	1	1q21.2	HIST2H2AB	histone cluster 2 H2A family member b	317772	-1.47305	0.000296451
5490546	ILMN_1745021	1	1q32.3	SLC30A1	solute carrier family 30 member 1	7779	-1.45337	1.52007e-06
6290685	ILMN_1658702	6	6p22.1	HIST1H2BJ	histone cluster 1 H2B family member j	8970	-1.43328	5.46116e-06
6450161	ILMN_2198516	5	5q14.3	ARRDC3	arrestin domain containing 3	57561	-1.41767	9.28159e-08
830619	ILMN_1676984	12	12q13.3	DDIT3	DNA damage inducible transcript 3	1649	-1.38539	1.77034e-07
3890102	ILMN_2408566	12	12q13.13	NR4A1	nuclear receptor subfamily 4 group A member 1	3164	-1.3621	1.27478e-09
4560706	ILMN_1678968	8	8q22.1	GEM	GTP binding protein overexpressed in skeletal muscle	2669	-1.28657	1.31259e-05
4730021	ILMN_1694249	1	1q32.2	CD34	CD34 molecule	947	-1.21477	2.69424e-05
1690706	ILMN_1749368	6	6p22.1	HIST1H3H	histone cluster 1 H3 family member h	8357	-1.16718	0.010183
5860521	ILMN_2067852	1	1q32.3	SLC30A1	solute carrier family 30 member 1	7779	-1.16412	0.000137787
5310445	ILMN_1700994	22	22q12.1	KREMEN1	kringle containing transmembrane protein 1	83999	-1.16356	3.64674e-06
1820632	ILMN_2054297	1	1q31.1	PTGS2	prostaglandin-endoperoxide synthase 2	5743	-1.15681	4.71893e-06
6840743	ILMN_1653125	17	17p13.1	PER1	period circadian regulator 1	5187	-1.15118	0.00128218
6400364	ILMN_1782305	2	2q24.1	NR4A2	nuclear receptor subfamily 4 group A member 2	4929	-1.14958	1.69444e-05
510768	ILMN_1682711	7	7q11.21	GS1-124K5.11	RAB guanine nucleotide exchange factor 1 pseudogene	493754	-1.12866	0.000230084
770494	ILMN_2276952	X	Xq22.3	TSC22D3	TSC22 domain family member 3	1831	-1.1221	0.000155555
1980309	ILMN_2184373	4	4q13.3	CXCL8	C-X-C motif chemokine ligand 8	3576	-1.11417	2.16408e-06
5310411	ILMN_1708728	12	12p12.3	H2AFJ	H2A histone family member J	55766	-1.11277	0.00118201
70403	ILMN_1806456	14	14q24.3	BBOF1	basal body orientation factor 1	80127	-1.10876	1.12606e-07
6040600	ILMN_1652456	17	17q11.2	TMEM98	transmembrane protein 98	26022	-1.10494	4.40885e-05
4570458	ILMN_2374159	16	16q13	HERPUD1	homocysteine inducible ER protein with ubiquitin like domain 1	9709	-1.08614	1.30258e-09
6860377	ILMN_1781285	5	5q35.1	DUSP1	dual specificity phosphatase 1	1843	-1.08484	0.00167376
4610189	ILMN_2374164	16	16q13	HERPUD1	homocysteine inducible ER protein with ubiquitin like domain 1	9709	-1.08303	3.63221e-06
4920110	ILMN_1718977	19	19p13.3	GADD45B	growth arrest and DNA damage inducible beta	4616	-1.08032	0.0001297
870408	ILMN_1724181	4	4q31.21	IL15	interleukin 15	3600	-1.06685	0.000176752
5490139	ILMN_3249645	21	21q11.2	HSPA13	heat shock protein family A (Hsp70) member 13	6782	-1.06565	0.000166372
3870112	ILMN_1734486	1	1q25.3	TSEN15	tRNA splicing endonuclease subunit 15	116461	-1.05589	1.62124e-05
7160239	ILMN_1751607	19	19q13.32	FOSB	FosB proto-oncogene, AP-1 transcription factor subunit	2354	-1.0505	7.99636e-05
780554	ILMN_1684316	13	13q32.1	MBNL2	muscleblind like splicing regulator 2	10150	-1.04777	1.87853e-05
4280678	ILMN_1785071	5	5p12	SELENOP	selenoprotein P	6414	-1.03905	0.00087391
6590594	ILMN_1792689	6	6p22.2	HIST1H2AC	histone cluster 1 H2A family member c	8334	-1.03362	0.0011818
3400300	ILMN_1793846	2	2q33.1	BZW1	basic leucine zipper and W2 domains 1	9689	-1.02037	0.0022687
2630554	ILMN_1762080	5	5q14.1	JMY	junction mediating and regulatory protein, p53 cofactor	133746	-1.01708	3.1102e-06
650639	ILMN_2339955	2	2q24.1	NR4A2	nuclear receptor subfamily 4 group A member 2	4929	-1.01705	2.76613e-05
460010	ILMN_2120695	X	Xp11.4	TSPAN7	tetraspanin 7	7102	-1.01082	4.29575e-06
1010528	ILMN_1710284	3	3q29	HES1	hes family bHLH transcription factor 1	3280	-0.985833	3.90126e-07
2760164	ILMN_1773742	7	c("7q31.1", "14q24.2-q24.3")	DNAJB9	DnaJ heat shock protein family (Hsp40) member B9	4189	-0.980539	0.000160647
540246	ILMN_2391231	15	15q21.1	SORD	sorbitol dehydrogenase	6652	-0.978729	0.000148174
3520056	ILMN_2316778	12	12p12.1	ETNK1	ethanolamine kinase 1	55500	-0.977491	0.000183968
1990717	ILMN_1749915	1	1p36.11	RSRP1	arginine and serine rich protein 1	57035	-0.977014	0.00299295
4780128	ILMN_2374865	1	1q32.3	ATF3	activating transcription factor 3	467	-0.969381	2.57429e-06
1500082	ILMN_1739241	15	15q15.1	CHAC1	ChaC glutathione specific gamma-glutamylcyclotransferase 1	79094	-0.960118	0.000133101
3870523	ILMN_1788988	8	8p11.21	THAP1	THAP domain containing 1	55145	-0.958936	0.00075391
2640707	ILMN_1698668	3	3p24.2	NR1D2	nuclear receptor subfamily 1 group D member 2	9975	-0.944503	0.000696769
6130040	ILMN_1653801	NA	NA	NA	NA		-0.943856	8.05631e-06
610670	ILMN_1731086	15	15q24.3	ISL2	ISL LIM homeobox 2	64843	-0.941972	0.00010445
1260086	ILMN_1793990	2	2p25.1	ID2	inhibitor of DNA binding 2	3398	-0.941752	9.84715e-05
5420528	ILMN_1813019	1	1p31.1	DNAJB4	DnaJ heat shock protein family (Hsp40) member B4	11080	-0.938643	0.00168456
4900114	ILMN_1756826	2	2p22.1	MORN2	MORN repeat containing 2	729967	-0.938432	4.18855e-05
3450300	ILMN_1658110	18	18p11.21	FAM210A	family with sequence similarity 210 member A	125228	-0.930098	0.00399796
670341	ILMN_1704043	2	2q37.3	PRR21	proline rich 21	643905	-0.918747	0.00588464
7150703	ILMN_3202022	NA	NA	NA	NA		-0.918076	0.0039025
6350121	ILMN_1683239	3	3p21.31	RASSF1	Ras association domain family member 1	11186	-0.91257	0.000386288
7560382	ILMN_1771805	1	1q32.1	ELK4	ELK4, ETS transcription factor	2005	-0.909871	0.00127823
3830170	ILMN_1724145	17	17q25.3	CBX4	chromobox 4	8535	-0.908202	1.62461e-05
5860348	ILMN_1720889	4	4q32.3	MSMO1	methylsterol monooxygenase 1	6307	-0.904271	7.70605e-07
5810307	ILMN_3245297	2	2q23.2	LYPD6B	LY6/PLAUR domain containing 6B	130576	-0.898561	0.000297315
3170524	ILMN_1913676	NA	NA	NA	NA		-0.897887	0.000988971
160114	ILMN_1768271	6	6q13	SMAP1	small ArfGAP 1	60682	-0.897308	1.35426e-05
6270037	ILMN_1769412	9	9q34.13	RAPGEF1	Rap guanine nucleotide exchange factor 1	2889	-0.896312	5.22998e-07
2850068	ILMN_1799069	4	4q21.1	CNOT6L	CCR4-NOT transcription complex subunit 6 like	246175	-0.891825	0.000548102
2120259	ILMN_1665203	6	6q25.1	SUMO4	small ubiquitin-like modifier 4	387082	-0.889135	6.41227e-06
3840767	ILMN_1809291	X	Xp11.4	TSPAN7	tetraspanin 7	7102	-0.888309	0.000304695
1660296	ILMN_2086095	2	2p25.1	ID2	inhibitor of DNA binding 2	3398	-0.888097	0.000393001
3290468	ILMN_1755369	19	19p13.11	RAB3A	RAB3A, member RAS oncogene family	5864	-0.884129	1.02415e-05
6940181	ILMN_2140799	10	10q26.13	FAM24B	family with sequence similarity 24 member B	196792	-0.883877	0.00025544
2630743	ILMN_1679782	10	10q24.31	BLOC1S2	biogenesis of lysosomal organelles complex 1 subunit 2	282991	-0.883124	0.000380825
7150671	ILMN_1780444	10	10q24.32	ARL3	ADP ribosylation factor like GTPase 3	403	-0.877214	0.000862412
4180139	ILMN_1748105	11	11q12.2	DDB1	damage specific DNA binding protein 1	1642	-0.876042	0.00166085
4060672	ILMN_2198515	5	5q14.3	ARRDC3	arrestin domain containing 3	57561	-0.872995	0.000342552
520754	ILMN_1758339	20	20q13.2-q13.31	CSTF1	cleavage stimulation factor subunit 1	1477	-0.862944	0.000342795
1660743	ILMN_1713281	12	12q24.11	FAM222A	family with sequence similarity 222 member A	84915	-0.85967	4.44045e-05
1400543	ILMN_1785900	21	21q21.1	CXADR	CXADR, Ig-like cell adhesion molecule	1525	-0.856947	3.86979e-05
540647	ILMN_1782429	1	1p21.3	TMEM56	transmembrane protein 56	148534	-0.855226	0.00221326
50754	ILMN_1733560	15	15q22.31	SPG21	SPG21, maspardin	51324	-0.851422	0.000797129
5570279	ILMN_1757406	6	6p22.2	HIST1H1C	histone cluster 1 H1 family member c	3006	-0.850264	0.00108051
1170246	ILMN_2367883	8	8q22.1	GEM	GTP binding protein overexpressed in skeletal muscle	2669	-0.848989	0.000634676
20201	ILMN_1776552	1	1p31.1	FUBP1	far upstream element binding protein 1	8880	-0.840188	0.00110323
3850519	ILMN_3237329	4	4q32.1	FNIP2	folliculin interacting protein 2	57600	-0.834676	0.0134612
4200070	ILMN_1737283	X	Xq22.2	TMSB15B	thymosin beta 15B	286527	-0.83329	0.000376183
2750129	ILMN_1798108	6	6q25.1	ARMT1	acidic residue methyltransferase 1	79624	-0.831877	0.000608248
2690324	ILMN_1805192	10	10q25.1	ITPRIP	inositol 1,4,5-trisphosphate receptor interacting protein	85450	-0.830981	0.00103506
4040541	ILMN_1738251	3	3q13.31	DRD3	dopamine receptor D3	1814	-0.829152	2.09084e-07
60079	ILMN_1775304	19	19p13.12	DNAJB1	DnaJ heat shock protein family (Hsp40) member B1	3337	-0.828846	4.85207e-05
2970347	ILMN_3239181	10	10q25.1	ITPRIP	inositol 1,4,5-trisphosphate receptor interacting protein	85450	-0.826619	0.000510063
2490719	ILMN_1798543	2	2q32.3	STK17B	serine/threonine kinase 17b	9262	-0.821835	5.11904e-05
1090338	ILMN_2157240	15	15q21.3	MNS1	meiosis specific nuclear structural 1	55329	-0.813146	0.00235045
6960035	ILMN_1730945	19	19p13.11	TMEM59L	transmembrane protein 59 like	25789	-0.807989	0.00145352
2100411	ILMN_1690653	11	11q13.2	CDK2AP2	cyclin dependent kinase 2 associated protein 2	10263	-0.806857	0.00133767
3420019	ILMN_1719163	19	19p13.2	ZNF557	zinc finger protein 557	79230	-0.806055	0.00159555
70270	ILMN_1731640	X	Xq22.2	TMSB15B	thymosin beta 15B	286527	-0.805395	7.15256e-05
1470465	ILMN_1764361	12	12p13.2	DUSP16	dual specificity phosphatase 16	80824	-0.803326	2.61546e-06
5890653	ILMN_1718565	11	11p15.4	CDKN1C	cyclin dependent kinase inhibitor 1C	1028	-0.799319	0.000594718
7000368	ILMN_1703108	11	11q12.1	UBE2L6	ubiquitin conjugating enzyme E2 L6	9246	-0.798253	0.00313898
870195	ILMN_3301824	1	1q25.3	TSEN15	tRNA splicing endonuclease subunit 15	116461	-0.798221	0.000141259
4150148	ILMN_3248758	NA	NA	NA	NA		-0.797308	0.00238626
2750278	ILMN_2178088	5	5p12	ZNF131	zinc finger protein 131	7690	-0.79461	0.00382107
6350446	ILMN_2376403	X	Xq22.3	TSC22D3	TSC22 domain family member 3	1831	-0.794536	0.000929542
2060750	ILMN_3258346	NA	NA	NA	NA		-0.793228	0.0280062
6020195	ILMN_2252160	12	12q24.31	UBC	ubiquitin C	7316	-0.793129	0.000197536
1400328	ILMN_3202373	NA	NA	NA	NA		-0.791254	0.00168574
3610370	ILMN_2296036	18	18p11.21	PTPN2	protein tyrosine phosphatase, non-receptor type 2	5771	-0.790398	0.000374468
6590707	ILMN_1654421	12	12q24.31	MPHOSPH9	M-phase phosphoprotein 9	10198	-0.789699	0.000664412
6580138	ILMN_1651599	9	9q34.3	ENTPD2	ectonucleoside triphosphate diphosphohydrolase 2	954	-0.787452	0.00900703
2320398	ILMN_1719254	14	14q22.1	TRIM9	tripartite motif containing 9	114088	-0.787132	0.0073362
3290564	ILMN_1715532	6	6q25.1	AKAP12	A-kinase anchoring protein 12	9590	-0.786738	0.015471
1660703	ILMN_2152502	7	7q21.3	CCZ1P-OR7E38P	CCZ1P-OR7E38P readthrough	389538	-0.785845	0.000440513
1440408	ILMN_1677092	8	8q22.1	GEM	GTP binding protein overexpressed in skeletal muscle	2669	-0.785318	0.000358964
6620725	ILMN_1675523	19	19p13.3	PLPP2	phospholipid phosphatase 2	8612	-0.779747	0.00650749
6650743	ILMN_1657554	X	Xp11.22	TSPYL2	TSPY like 2	64061	-0.77964	0.000341146
6350632	ILMN_1748124	X	Xq22.3	TSC22D3	TSC22 domain family member 3	1831	-0.776738	0.000204098
7560703	ILMN_2367186	X	Xp22.2	PIGA	phosphatidylinositol glycan anchor biosynthesis class A	5277	-0.776384	1.78485e-05
1090433	ILMN_1808095	12	12q13.3	RNF41	ring finger protein 41	10193	-0.775264	5.88782e-06
1690044	ILMN_1672807	X	Xp22.2	CA5B	carbonic anhydrase 5B	11238	-0.773989	0.000200974
4250204	ILMN_1720703	12	12q23.1	SLC25A3	solute carrier family 25 member 3	5250	-0.771177	0.0102274
3190379	ILMN_1784287	1	1p22.1	TGFBR3	transforming growth factor beta receptor 3	7049	-0.769787	0.0221292
1510403	ILMN_3309664	14	14q32.31	MIR300	microRNA 300	100126297	-0.769491	0.00995608
3850433	ILMN_1660436	6	6p21.33	HSPA1B	heat shock protein family A (Hsp70) member 1B	3304	-0.765258	2.67536e-05
5820379	ILMN_1720988	2	2q33.2	ABI2	abl interactor 2	10152	-0.764712	3.65306e-06
1070037	ILMN_1662010	6	6p21.1	DLK2	delta like non-canonical Notch ligand 2	65989	-0.763823	0.000124676
4150270	ILMN_2132599	10	10q23.31	ANKRD22	ankyrin repeat domain 22	118932	-0.763472	0.00929873
1340600	ILMN_1659936	19	19q13.33	PPP1R15A	protein phosphatase 1 regulatory subunit 15A	23645	-0.762616	1.26306e-05
7160609	ILMN_1667201	12	12q21.33	POC1B	POC1 centriolar protein B	282809	-0.761646	0.000700504
3060523	ILMN_1753111	7	7q22.3	NAMPT	nicotinamide phosphoribosyltransferase	10135	-0.758557	0.0337512
3520427	ILMN_1812479	10	10q26.13	ATE1	arginyltransferase 1	11101	-0.755001	0.000612055
5090040	ILMN_1662243	13	13q34	ING1	inhibitor of growth family member 1	3621	-0.752168	1.46955e-05
1580196	ILMN_1758816	4	4q26	UGT8	UDP glycosyltransferase 8	7368	-0.752022	0.000526273
1690440	ILMN_1764573	X	Xq13.2	XIST	X inactive specific transcript	7503	-0.750684	0.000451261
2260450	ILMN_1737635	5	5p13.2	RAD1	RAD1 checkpoint DNA exonuclease	5810	-0.750005	0.00308477
5340170	ILMN_1774973	1	1p22.1	SNORD21	small nucleolar RNA, C/D box 21	6083	-0.749166	4.14588e-05
4830176	ILMN_1671642	13	13q13.3	CSNK1A1L	casein kinase 1 alpha 1 like	122011	-0.747131	0.00581402
5720458	ILMN_1699606	NA	NA	NA	NA		-0.746202	0.0159327
4120577	ILMN_1721801	8	8q21.11	GDAP1	ganglioside induced differentiation associated protein 1	54332	-0.745622	0.000291068
3170468	ILMN_2364174	5	5q32	CSNK1A1	casein kinase 1 alpha 1	1452	-0.745526	0.0386041
4640110	ILMN_3194911	6	6p21.32	ATF6B	activating transcription factor 6 beta	1388	-0.745377	0.000457067
7560041	ILMN_1703123	3	3p22.2	CSRNP1	cysteine and serine rich nuclear protein 1	64651	-0.742812	3.83494e-05
4570326	ILMN_1668351	7	7q22.1	TAF6	TATA-box binding protein associated factor 6	6878	-0.740906	0.0172869
20692	ILMN_1779076	6	6q22.32	HINT3	histidine triad nucleotide binding protein 3	135114	-0.737239	0.00341715
3940315	ILMN_3299583	1	1q21.3	CKS1B	CDC28 protein kinase regulatory subunit 1B	1163	-0.737207	0.000275578
4260750	ILMN_1807737	c("X", "Y")	c("Xp22.33", "Yp11.2")	AKAP17A	A-kinase anchoring protein 17A	8227	-0.736934	0.000122615
4250537	ILMN_2222317	1	1p31.1	DNAJB4	DnaJ heat shock protein family (Hsp40) member B4	11080	-0.736304	0.0038865
4780414	ILMN_2400143	3	3p25.2	RPL32	ribosomal protein L32	6161	-0.73444	0.000356209
730390	ILMN_3239188	NA	NA	NA	NA		-0.733599	0.00646438
1470608	ILMN_1723743	11	11q12.3	ROM1	retinal outer segment membrane protein 1	6094	-0.732552	0.00159255
1980768	ILMN_1801313	3	3q25.1	SIAH2	siah E3 ubiquitin protein ligase 2	6478	-0.73207	0.000545858
1170689	ILMN_1696975	1	1p31.3	USP1	ubiquitin specific peptidase 1	7398	-0.731905	0.000257062
630100	ILMN_1673676	20	20p11.23	SNX5	sorting nexin 5	27131	-0.730505	0.0213105
670725	ILMN_1902005	NA	NA	NA	NA		-0.728565	0.0107405
7610538	ILMN_1773964	3	3q21.3	H1FX	H1 histone family member X	8971	-0.728538	0.000409463
5490414	ILMN_1764082	6	6p22.3	MBOAT1	membrane bound O-acyltransferase domain containing 1	154141	-0.727769	0.000794219
1230048	ILMN_1812070	7	7q21.12	ABCB1	ATP binding cassette subfamily B member 1	5243	-0.727686	0.000752674
2640093	ILMN_1773613	11	11q23.3	POU2F3	POU class 2 homeobox 3	25833	-0.725486	0.00343604
4880524	ILMN_1731771	4	4q31.3	RPS3A	ribosomal protein S3A	6189	-0.725103	0.036427
2340564	ILMN_1680465	10	10p12.31	ARL5B	ADP ribosylation factor like GTPase 5B	221079	-0.724208	0.000201006
1990736	ILMN_1706028	NA	NA	NA	NA		-0.723992	3.32125e-06
7200082	ILMN_1784328	11	11q12.3	SNORD25	small nucleolar RNA, C/D box 25	9303	-0.723682	0.00128178
2710368	ILMN_1815392	X	Xq25	ACTRT1	actin related protein T1	139741	-0.722234	0.0196082
2650022	ILMN_1729058	5	5q14.1	SCAMP1	secretory carrier membrane protein 1	9522	-0.720858	0.00126384
3890682	ILMN_1658439	5	5q12.3	TRAPPC13	trafficking protein particle complex 13	80006	-0.720395	0.0121523
6110494	ILMN_1659923	9	9q21.2	GNAQ	G protein subunit alpha q	2776	-0.719167	0.00281498
4290170	ILMN_1681888	3	3p21.31	PRKAR2A	protein kinase cAMP-dependent type II regulatory subunit alpha	5576	-0.718426	0.004445
4540102	ILMN_1806306	15	15q26.1	SV2B	synaptic vesicle glycoprotein 2B	9899	-0.718103	2.45246e-05
6200669	ILMN_1758623	6	6p22.2	HIST1H2BD	histone cluster 1 H2B family member d	3017	-0.713929	0.00131438
870056	ILMN_1723846	12	12q14.1	EEF1AKMT3	EEF1A lysine methyltransferase 3	25895	-0.711366	0.000477164
2060553	ILMN_3247059	7	7q31.32	HYAL6P	hyaluronidase 6, pseudogene	26062	-0.710707	0.00322582
4880750	ILMN_1785286	2	2p21	SOCS5	suppressor of cytokine signaling 5	9655	-0.710066	0.00415127
5130707	ILMN_1893033	NA	NA	NA	NA		-0.70854	0.00264605
1340438	ILMN_1761834	9	9q13	PTGER4P2-CDK2AP2P2	PTGER4P2-CDK2AP2P2 readthrough, transcribed pseudogene	442421	-0.708506	8.28768e-05
610315	ILMN_2093980	9	9q31.2	TMEM38B	transmembrane protein 38B	55151	-0.708452	0.00298388
4920440	ILMN_1717138	1	1p36.22	CLSTN1	calsyntenin 1	22883	-0.707213	9.94634e-05
6350181	ILMN_3306028	NA	NA	NA	NA		-0.706032	0.00152229
1740291	ILMN_1681737	X	Xq22.1	TMSB15A	thymosin beta 15a	11013	-0.706019	3.31878e-05
2120398	ILMN_1708709	4	4q12	KIAA1211	KIAA1211	57482	-0.705048	0.00774698
270601	ILMN_1763007	1	1p21.2	MFSD14A	major facilitator superfamily domain containing 14A	64645	-0.704672	0.00963162
1500681	ILMN_2384807	8	8q21.2	LRRCC1	leucine rich repeat and coiled-coil centrosomal protein 1	85444	-0.703977	0.00194488
6560608	ILMN_1795703	7	7p22.3	GET4	golgi to ER traffic protein 4	51608	-0.70359	0.0266613
5490278	ILMN_1787513	7	7q36.1-q36.2	ACTR3B	ARP3 actin related protein 3 homolog B	57180	-0.702525	0.000402413
1710553	ILMN_1658383	NA	NA	NA	NA		-0.70028	0.0016324
1430500	ILMN_2410864	4	4p15.33	RAB28	RAB28, member RAS oncogene family	9364	-0.70025	0.0148955
4230484	ILMN_1798380	9	c("9q21.32", "9q21.2-q21.3")	UBQLN1	ubiquilin 1	29979	-0.699867	1.28231e-06
7560092	ILMN_2217809	11	11q14.1	TMEM126A	transmembrane protein 126A	84233	-0.697983	0.00154966
50086	ILMN_2314007	15	15q21.3	TCF12	transcription factor 12	6938	-0.696919	0.000977379
2100196	ILMN_2054019	1	1p36.33	ISG15	ISG15 ubiquitin-like modifier	9636	-0.696479	0.00706927
6980370	ILMN_1754507	6	6p25.3	IRF4	interferon regulatory factor 4	3662	-0.696369	0.00337402
1430138	ILMN_1680139	22	22q13.1	MAFF	MAF bZIP transcription factor F	23764	-0.696183	0.000210115
3370181	ILMN_1752270	7	7q21.12	SLC25A40	solute carrier family 25 member 40	55972	-0.694948	0.00166856
5420564	ILMN_1707312	9	9q22.31	NFIL3	nuclear factor, interleukin 3 regulated	4783	-0.693613	3.16368e-05
3450082	ILMN_2360401	7	7p22.3	LFNG	LFNG O-fucosylpeptide 3-beta-N-acetylglucosaminyltransferase	3955	-0.693576	8.48802e-08
5130348	ILMN_3309694	3	3p21.1	SNORD69	small nucleolar RNA, C/D box 69	692109	-0.692722	0.000432005
20121	ILMN_1666617	6	6q13	LINC00472	long intergenic non-protein coding RNA 472	79940	-0.692501	0.00940103
4480647	ILMN_1757391	21	21q22.11	TMEM50B	transmembrane protein 50B	757	-0.69192	0.00534174
4490768	ILMN_1909276	NA	NA	NA	NA		-0.690193	0.00459154
1570113	ILMN_1769960	17	17q25.3	GPS1	G protein pathway suppressor 1	2873	-0.690094	0.00187944
450458	ILMN_1680223	7	7q31.1	PNPLA8	patatin like phospholipase domain containing 8	50640	-0.689197	0.0042294
3440021	ILMN_2266005	21	21q22.11-q22.12	SMIM11A	small integral membrane protein 11A	54065	-0.68918	4.73074e-05
5960167	ILMN_1733453	2	2p21	RHOQ	ras homolog family member Q	23433	-0.689104	0.00753702
3830138	ILMN_1661683	17	17q21.1	THRA	thyroid hormone receptor alpha	7067	-0.688061	0.0153432
7610026	ILMN_2180582	7	7q31.1	PNPLA8	patatin like phospholipase domain containing 8	50640	-0.687394	0.00171945
6980450	ILMN_1809146	3	3q29	MELTF	melanotransferrin	4241	-0.686751	0.0122781
510619	ILMN_1807535	17	17p13.3	YWHAE	tyrosine 3-monooxygenase/tryptophan 5-monooxygenase activation protein epsilon	7531	-0.68659	0.00131738
10392	ILMN_1753404	12	12p13.31	LRRC23	leucine rich repeat containing 23	10233	-0.685756	0.00551698
5050402	ILMN_1813314	6	6p22.1	HIST1H2BK	histone cluster 1 H2B family member k	85236	-0.685056	0.00124197
2900615	ILMN_3185052	NA	NA	NA	NA		-0.685027	0.00217472
840463	ILMN_1841133	NA	NA	NA	NA		-0.684699	0.00233029
5390672	ILMN_2373689	13	13q21.2	DIAPH3	diaphanous related formin 3	81624	-0.684325	0.00119319
620338	ILMN_1723822	3	3p21.1	PBRM1	polybromo 1	55193	-0.683759	0.000136936
1070487	ILMN_2386790	12	12p13.2	KLRC3	killer cell lectin like receptor C3	3823	-0.683313	0.000365176
730035	ILMN_1687724	4	4q23	RAP1GDS1	Rap1 GTPase-GDP dissociation stimulator 1	5910	-0.68124	0.0216324
4640484	ILMN_2174612	5	5q33.2	CNOT8	CCR4-NOT transcription complex subunit 8	9337	-0.681142	0.00272863
3120685	ILMN_1821531	NA	NA	NA	NA		-0.679692	3.70853e-05
2970577	ILMN_1732278	1	1q41	AIDA	axin interactor, dorsalization associated	64853	-0.679595	0.0129578
7200437	ILMN_2274923	5	5q11.2	MOCS2	molybdenum cofactor synthesis 2	4338	-0.679458	0.000703942
4880703	ILMN_2351611	9	c("9q21.32", "9q21.2-q21.3")	UBQLN1	ubiquilin 1	29979	-0.678072	1.94967e-05
630619	ILMN_2092850	4	4q21.23	HPSE	heparanase	10855	-0.677987	0.000662676
4860735	ILMN_2327203	7	7q31.33	POT1	protection of telomeres 1	25913	-0.676319	0.0152352
2850646	ILMN_2221014	8	8p11.23	BAG4	BCL2 associated athanogene 4	9530	-0.67505	0.00364703
6330494	ILMN_2374778	15	15q21.1	DUT	deoxyuridine triphosphatase	1854	-0.674657	0.00386169
7210253	ILMN_3228688	NA	NA	NA	NA		-0.673428	0.00129317
4880671	ILMN_2391355	2	2p13.1	STAMBP	STAM binding protein	10617	-0.672433	1.57955e-06
7040408	ILMN_1674334	X	Xq22.1	ARMCX6	armadillo repeat containing X-linked 6	54470	-0.672195	0.00713549
4120341	ILMN_1683927	17	17p13.2	ITGAE	integrin subunit alpha E	3682	-0.668318	0.00598831
3850020	ILMN_1797499	8	8q11.21	PRKDC	protein kinase, DNA-activated, catalytic subunit	5591	-0.668161	0.00318952
6420341	ILMN_2081645	8	8q23.1	RSPO2	R-spondin 2	340419	-0.667722	0.00108966
2260672	ILMN_2284327	14	14q12	DCAF11	DDB1 and CUL4 associated factor 11	80344	-0.667279	0.00229703
3710193	ILMN_1808107	1	1p36.33	MMP23B	matrix metallopeptidase 23B	8510	-0.666158	0.0145509
2100528	ILMN_1788489	6	6p22.2	HIST1H3F	histone cluster 1 H3 family member f	8968	-0.666096	0.00720326
5900397	ILMN_1657884	17	17q21.33	NME2	NME/NM23 nucleoside diphosphate kinase 2	4831	-0.665955	0.000186554
1450020	ILMN_2201668	1	1q24.2	SLC19A2	solute carrier family 19 member 2	10560	-0.665772	0.00483635
6620403	ILMN_2290776	2	2p23.3	AGBL5	ATP/GTP binding protein like 5	60509	-0.664025	0.00220001
1740753	ILMN_3248676	9	9q21.11	CBWD3	COBW domain containing 3	445571	-0.662721	0.00126176
1780050	ILMN_1654141	13	13q12.11	ZDHHC20	zinc finger DHHC-type containing 20	253832	-0.661087	0.000299128
7380338	ILMN_1700024	6	6q25.1	UST	uronyl 2-sulfotransferase	10090	-0.660276	0.000388499
6960301	ILMN_1709741	NA	NA	NA	NA		-0.659961	0.00505279
4150209	ILMN_1774528	17	17q25.1	GPRC5C	G protein-coupled receptor class C group 5 member C	55890	-0.659774	0.0152594
2690349	ILMN_1766110	X	Xq26.2	PHF6	PHD finger protein 6	84295	-0.659715	0.0345257
5860327	ILMN_1807243	10	10p13	PRPF18	pre-mRNA processing factor 18	8559	-0.659507	0.00238458
5290333	ILMN_1657087	2	2q31.2-q31.3	ZNF385B	zinc finger protein 385B	151126	-0.659454	0.000311667
1690437	ILMN_3243986	1	1p11.2	FAM72B	family with sequence similarity 72 member B	653820	-0.659253	0.00537137
4070129	ILMN_1674694	18	18q12.2-q12.3	MIR924HG	MIR924 host gene	647946	-0.657311	0.00316323
6350768	ILMN_1654637	3	3p25.3	SETD5	SET domain containing 5	55209	-0.657016	0.0119584
2810246	ILMN_2315979	2	2p23.1	LBH	limb bud and heart development	81606	-0.656738	0.00175398
940725	ILMN_1707051	18	18q23	NFATC1	nuclear factor of activated T cells 1	4772	-0.656155	0.00129634
2370424	ILMN_3251383	2	2q21.1	CCDC74B	coiled-coil domain containing 74B	91409	-0.653513	0.0292836
6290563	ILMN_1662852	16	16p12.3	IQCK	IQ motif containing K	124152	-0.653296	5.53538e-05
4050735	ILMN_2188374	12	12q14.2	XPOT	exportin for tRNA	11260	-0.653176	0.0209293
3400672	ILMN_1718960	18	18q22.1	SERPINB8	serpin family B member 8	5271	-0.653116	0.0195391
3450408	ILMN_2288784	11	11p14.1	CCDC34	coiled-coil domain containing 34	91057	-0.652933	0.00325623
2680110	ILMN_1770338	3	3q25.1	TM4SF1	transmembrane 4 L six family member 1	4071	-0.652411	0.0213946
7400327	ILMN_1691864	2	2q13	SEPT10	septin 10	151011	-0.651781	0.0314537
5690139	ILMN_1803094	11	11q22.3	PDGFD	platelet derived growth factor D	80310	-0.651466	0.000781159
4810292	ILMN_2369666	1	1q32.2	CR2	complement C3d receptor 2	1380	-0.651374	0.000153865
4900082	ILMN_1870085	NA	NA	NA	NA		-0.647531	0.0046498
1690121	ILMN_1652790	2	2q33.1	CLK1	CDC like kinase 1	1195	-0.647176	0.0104705
540692	ILMN_1794011	3	3q24	CHST2	carbohydrate sulfotransferase 2	9435	-0.645797	0.0289872
1820739	ILMN_2357730	9	9q22.1	CDK20	cyclin dependent kinase 20	23552	-0.645186	0.000399903
7040184	ILMN_1657547	11	11p14.1	CCDC34	coiled-coil domain containing 34	91057	-0.643832	0.00721839
6350253	ILMN_1871688	NA	NA	NA	NA		-0.643456	0.00511036
3610068	ILMN_1691959	NA	NA	NA	NA		-0.643377	0.00702528
6100372	ILMN_2389114	7	7p12.2	FIGNL1	fidgetin like 1	63979	-0.642507	0.00101613
3520398	ILMN_2405324	1	1p36.11	IFNLR1	interferon lambda receptor 1	163702	-0.641683	0.00145197
1940327	ILMN_1779480	2	2p11.2	KCMF1	potassium channel modulatory factor 1	56888	-0.641538	0.00171388
1470523	ILMN_1677530	2	2q37.3	THAP4	THAP domain containing 4	51078	-0.641099	0.0103374
6350376	ILMN_2412624	11	11p11.2	TP53I11	tumor protein p53 inducible protein 11	9537	-0.640082	0.0314347
1690424	ILMN_1784230	2	2q11.1	TRIM43	tripartite motif containing 43	129868	-0.639861	0.0108807
360192	ILMN_1793474	7	7q36.3	INSIG1	insulin induced gene 1	3638	-0.639336	0.000108072
7210202	ILMN_1652472	7	7q34	BRAF	B-Raf proto-oncogene, serine/threonine kinase	673	-0.638071	0.0104544
4590767	ILMN_1711174	1	1q21.3	SPRR1B	small proline rich protein 1B	6699	-0.637821	0.0286294
1030450	ILMN_1684724	1	1q32.2	CR2	complement C3d receptor 2	1380	-0.637593	0.00391578
6180592	ILMN_1852793	NA	NA	NA	NA		-0.6375	0.00534851
7610187	ILMN_2358457	22	22q13.1	ATF4	activating transcription factor 4	468	-0.634315	0.000300119
2810082	ILMN_2049727	20	20q13.12	OSER1	oxidative stress responsive serine rich 1	51526	-0.634133	6.20787e-05
5390008	ILMN_1657855	7	7q22.1	ACTL6B	actin like 6B	51412	-0.632307	0.000228519
730142	ILMN_1677906	NA	NA	NA	NA		-0.630135	0.0179743
3460050	ILMN_3283146	NA	NA	NA	NA		-0.629947	0.00950388
1580301	ILMN_3307935	15	15q12	ATP10A	ATPase phospholipid transporting 10A (putative)	57194	-0.629625	0.00148467
2760129	ILMN_2352609	3	3p25.3	OGG1	8-oxoguanine DNA glycosylase	4968	-0.629616	0.00219968
3390221	ILMN_2225144	3	3p13	EIF4E3	eukaryotic translation initiation factor 4E family member 3	317649	-0.629348	0.00101497
1190703	ILMN_1670572	8	8p11.21	IDO2	indoleamine 2,3-dioxygenase 2	169355	-0.629338	0.0340673
1710753	ILMN_2120022	10	10p12.31	ARL5B	ADP ribosylation factor like GTPase 5B	221079	-0.628886	7.44617e-05
7510343	ILMN_3242362	9	9p13.3	LINC00950	long intergenic non-protein coding RNA 950	92973	-0.627346	0.00702659
3890543	ILMN_1696028	12	12p12.1	ETNK1	ethanolamine kinase 1	55500	-0.62727	0.00145629
1770400	ILMN_1765644	4	4p12	COMMD8	COMM domain containing 8	54951	-0.627222	0.00549088
2810379	ILMN_1824498	NA	NA	NA	NA		-0.627111	0.00706365
2360255	ILMN_2411116	6	6q27	FGFR1OP	FGFR1 oncogene partner	11116	-0.627051	0.000949468
7330463	ILMN_3239108	11	11p15.4	SNORA3A	small nucleolar RNA, H/ACA box 3A	619562	-0.626955	0.000169825
110523	ILMN_1833478	NA	NA	NA	NA		-0.625018	0.00207739
270390	ILMN_3286312	1	1q32.3	NEK2	NIMA related kinase 2	4751	-0.624825	0.00768026
3170392	ILMN_3307654	14	14q13.3-q21.1	MIPOL1	mirror-image polydactyly 1	145282	-0.624542	0.00359476
1010138	ILMN_1757272	8	8p11.21	THAP1	THAP domain containing 1	55145	-0.623758	0.00138249
5810717	ILMN_3238608	X	Xp21.1	PRRG1	proline rich and Gla domain 1	5638	-0.623483	0.00741154
4180132	ILMN_2346769	1	1q22	FAM189B	family with sequence similarity 189 member B	10712	-0.623425	0.00487634
3290324	ILMN_1807088	5	5p13.1	TTC33	tetratricopeptide repeat domain 33	23548	-0.623299	0.0171651
5310630	ILMN_2332267	5	5q23.2	CSNK1G3	casein kinase 1 gamma 3	1456	-0.62323	0.00296207
6130634	ILMN_1803192	15	15q15.3	WDR76	WD repeat domain 76	79968	-0.622688	0.00233948
450538	ILMN_1726913	4	4p15.2	RBPJ	recombination signal binding protein for immunoglobulin kappa J region	3516	-0.622081	0.00724387
7150433	ILMN_1700955	3	3q29	TCTEX1D2	Tctex1 domain containing 2	255758	-0.620106	9.13653e-05
2690039	ILMN_3304200	2	2q31.2-q31.3	ZNF385B	zinc finger protein 385B	151126	-0.619922	0.00193333
1090682	ILMN_1727605	6	6q22.1	FRK	fyn related Src family tyrosine kinase	2444	-0.619567	0.000848251
6520075	ILMN_1728698	16	16p12.3	GDE1	glycerophosphodiester phosphodiesterase 1	51573	-0.619304	9.02754e-05
5690390	ILMN_2285568	4	4q21.1	NAAA	N-acylethanolamine acid amidase	27163	-0.618692	0.00656003
110326	ILMN_1773395	NA	NA	NA	NA		-0.618508	0.0011578
3890750	ILMN_2380999	12	12p12.1	RECQL	RecQ like helicase	5965	-0.617214	0.000283686
4900524	ILMN_1728371	5	5q35.2	LOC643201	centrosomal protein 192kDa pseudogene	643201	-0.616063	0.00809511
5960044	ILMN_1708167	3	3p21.31	CDCP1	CUB domain containing protein 1	64866	-0.615698	0.0256154
7610201	ILMN_1795557	NA	NA	NA	NA		-0.615596	0.0361127
4830315	ILMN_2401878	1	1q41	DUSP10	dual specificity phosphatase 10	11221	-0.614658	0.00441281
7320291	ILMN_2081883	16	16p12.3	IQCK	IQ motif containing K	124152	-0.614639	2.7779e-05
110253	ILMN_1791366	11	11q13.1	RCOR2	REST corepressor 2	283248	-0.613655	0.00174119
3310450	ILMN_1755910	NA	NA	NA	NA		-0.61341	0.00345842
6200615	ILMN_1655922	NA	NA	NA	NA		-0.613364	0.0296201
4040343	ILMN_3179620	NA	NA	NA	NA		-0.613167	0.00300495
1940400	ILMN_1807298	9	9q31.1	NR4A3	nuclear receptor subfamily 4 group A member 3	8013	-0.612811	0.000187718
6040066	ILMN_1659953	22	22q13.2	SEPT3	septin 3	55964	-0.612352	0.0030569
20008	ILMN_3263243	7	7p22.3	LOC100128653	uncharacterized LOC100128653	100128653	-0.612339	0.00782554
1400246	ILMN_1668834	11	11q14.1	RSF1	remodeling and spacing factor 1	51773	-0.612205	0.0357263
3990608	ILMN_2147435	5	5q21.3	MAN2A1	mannosidase alpha class 2A member 1	4124	-0.612143	0.00174206
6200468	ILMN_1756326	9	9q22.2	CKS2	CDC28 protein kinase regulatory subunit 2	1164	-0.611704	0.000125122
3440156	ILMN_1814333	3	3q26.1	SERPINI1	serpin family I member 1	5274	-0.61161	9.92148e-05
3140619	ILMN_2063446	11	11p15.4	OR51B5	olfactory receptor family 51 subfamily B member 5	282763	-0.611026	0.000343976
2480048	ILMN_2064655	X	Xq28	CXorf40A	chromosome X open reading frame 40A	91966	-0.610712	0.0029696
6290192	ILMN_1657572	9	9q34.3	GRIN1	glutamate ionotropic receptor NMDA type subunit 1	2902	-0.610047	0.0104062
5860452	ILMN_1734410	5	5q35.1	BNIP1	BCL2 interacting protein 1	662	-0.609615	0.0013133
380563	ILMN_1680899	NA	NA	NA	NA		-0.609172	0.0288628
2190470	ILMN_2411897	8	8q22.3	KLF10	Kruppel like factor 10	7071	-0.608998	0.0434911
2850619	ILMN_1757497	7	7q22.1	VGF	VGF nerve growth factor inducible	7425	-0.608596	0.001258
4220674	ILMN_2229214	10	10q22.1	STOX1	storkhead box 1	219736	-0.60796	0.00294604
6940619	ILMN_1676737	2	2q37.3	SEPT2	septin 2	4735	-0.60771	0.00152446
60594	ILMN_1657619	4	4q23	DNAJB14	DnaJ heat shock protein family (Hsp40) member B14	79982	-0.607289	0.00815705
5270441	ILMN_2129273	2	2p22.2	STRN	striatin	6801	-0.607272	0.024845
670326	ILMN_1775944	2	2q33.2	ABI2	abl interactor 2	10152	-0.607131	0.00795159
5670594	ILMN_2347592	15	15q25.2	NMB	neuromedin B	4828	-0.606214	0.00958508
1580670	ILMN_3237069	NA	NA	NA	NA		-0.606039	0.00881034
5860368	ILMN_1691535	X	Xq24	CUL4B	cullin 4B	8450	-0.604446	0.00578111
3450273	ILMN_2381296	14	14q24.3	GSTZ1	glutathione S-transferase zeta 1	2954	-0.604118	0.00123246
4200333	ILMN_3235949	6	6p22.2	HIST1H3E	histone cluster 1 H3 family member e	8353	-0.603713	0.00493606
1770343	ILMN_1746012	12	12q13.3	MBD6	methyl-CpG binding domain protein 6	114785	-0.603036	0.0019801
580692	ILMN_1665832	20	20q11.21	ID1	inhibitor of DNA binding 1, HLH protein	3397	-0.602638	0.00839515
1740364	ILMN_1739253	2	2p13.1	STAMBP	STAM binding protein	10617	-0.601582	4.36953e-05
770338	ILMN_1689098	19	19q13.2	ATP1A3	ATPase Na+/K+ transporting subunit alpha 3	478	-0.600726	0.0196129
6650687	ILMN_1705985	X	Xp22.2	PIGA	phosphatidylinositol glycan anchor biosynthesis class A	5277	-0.600599	0.00140994
6220368	ILMN_1756669	1	1q24.1	POGK	pogo transposable element derived with KRAB domain	57645	0.600063	7.53144e-05
1300768	ILMN_1691143	10	10p12.1	RAB18	RAB18, member RAS oncogene family	22931	0.60007	0.014684
3850682	ILMN_1830984	NA	NA	NA	NA		0.600176	0.0162871
990735	ILMN_1665877	2	2q11.2	RNF149	ring finger protein 149	284996	0.600856	5.57878e-06
2510494	ILMN_1651229	1	1p34.1	IPO13	importin 13	9670	0.601821	0.000307028
3450189	ILMN_1731349	7	7p15.2	HOXA13	homeobox A13	3209	0.602162	0.000321896
160026	ILMN_1717180	13	13q12.13	MTMR6	myotubularin related protein 6	9107	0.602306	0.0172089
4900575	ILMN_2311548	17	17q23.1	PTRH2	peptidyl-tRNA hydrolase 2	51651	0.602422	0.000498783
6180392	ILMN_1705689	10	10q26.2	ADAM12	ADAM metallopeptidase domain 12	8038	0.602583	0.00142773
6450307	ILMN_2328972	20	20q11.21	DNMT3B	DNA methyltransferase 3 beta	1789	0.602854	0.00309994
4850543	ILMN_1710553	11	11q13.2	TMEM151A	transmembrane protein 151A	256472	0.60303	0.0277519
360280	ILMN_2147306	1	1p36.11	PNRC2	proline rich nuclear receptor coactivator 2	55629	0.603178	0.00010267
7550719	ILMN_1661778	11	11q13.3	TESMIN	testis expressed metallothionein like protein	9633	0.603701	0.00590684
3310376	ILMN_1765332	11	11q12.1	TIMM10	translocase of inner mitochondrial membrane 10	26519	0.604086	0.00778027
4480435	ILMN_1657571	19	19p13.13	ASNA1	arsA arsenite transporter, ATP-binding, homolog 1 (bacterial)	439	0.604167	0.0408201
770608	ILMN_3241744	19	19p13.2	KANK3	KN motif and ankyrin repeat domains 3	256949	0.604592	0.00989934
990685	ILMN_1678255	17	17p13.1	ALOXE3	arachidonate lipoxygenase 3	59344	0.605056	0.00856815
2450411	ILMN_2269256	10	10q21.3	DNAJC12	DnaJ heat shock protein family (Hsp40) member C12	56521	0.605231	0.00419508
2100537	ILMN_1745365	21	21q22.3	PKNOX1	PBX/knotted 1 homeobox 1	5316	0.605284	0.000114386
6940088	ILMN_2319913	12	12q13.2	DGKA	diacylglycerol kinase alpha	1606	0.605309	0.00278683
990162	ILMN_2234710	12	12p13.1-p12.3	C12orf60	chromosome 12 open reading frame 60	144608	0.605687	0.000801712
7160156	ILMN_1737255	22	22q11.23	LRRC75B	leucine rich repeat containing 75B	388886	0.606507	0.0178919
5670181	ILMN_1710078	6	6q25.3	TMEM181	transmembrane protein 181	57583	0.608037	0.000166407
6420411	ILMN_1814797	1	1q42.2	SLC35F3	solute carrier family 35 member F3	148641	0.60821	0.00244566
670598	ILMN_1695271	15	15q24.2	RPP25	ribonuclease P and MRP subunit p25	54913	0.608275	0.0343568
3990612	ILMN_3239435	4	4p16.3	HTT	huntingtin	3064	0.608411	0.0125422
3990026	ILMN_2374425	19	19q12	CCNE1	cyclin E1	898	0.608418	2.108e-05
1980088	ILMN_1832208	4	4p13	TMEM33	transmembrane protein 33	55161	0.609142	6.33075e-05
270474	ILMN_1788439	NA	NA	NA	NA		0.609155	0.0176983
650554	ILMN_3275206	NA	NA	NA	NA		0.60967	0.00202909
6370364	ILMN_1663575	NA	NA	NA	NA		0.610494	0.000530665
6620544	ILMN_1685112	17	17q23.3	TACO1	translational activator of cytochrome c oxidase I	51204	0.610674	3.41684e-05
5570730	ILMN_1724863	19	19p13.3	TICAM1	toll like receptor adaptor molecule 1	148022	0.610703	0.00416483
5820608	ILMN_2087575	19	19q13.32	ZC3H4	zinc finger CCCH-type containing 4	23211	0.611191	0.00200501
2320719	ILMN_1684086	14	14q32.2	BDKRB2	bradykinin receptor B2	624	0.611754	0.0138258
4480546	ILMN_1690352	10	10q21.3	ADO	2-aminoethanethiol dioxygenase	84890	0.611878	0.000684791
3610730	ILMN_1709937	19	19q13.31	KCNN4	potassium calcium-activated channel subfamily N member 4	3783	0.611899	0.00327762
2450681	ILMN_3229552	5	5q33.3	MED7	mediator complex subunit 7	9443	0.612484	0.00028794
3870484	ILMN_1714159	1	1p36.12	LUZP1	leucine zipper protein 1	7798	0.61255	0.000485034
5810689	ILMN_1661809	11	11p13	PRRG4	proline rich and Gla domain 4	79056	0.612567	0.027216
5960192	ILMN_1688205	19	19q13.41	KLK10	kallikrein related peptidase 10	5655	0.614062	0.00390569
3940414	ILMN_1696407	17	17q25.1	SRSF2	serine and arginine rich splicing factor 2	6427	0.614172	0.000684437
6840678	ILMN_3249435	11	11q24.1	UBASH3B	ubiquitin associated and SH3 domain containing B	84959	0.614334	0.00363718
2360673	ILMN_2401033	17	17q11.2	GOSR1	golgi SNAP receptor complex member 1	9527	0.614961	0.0149796
7200170	ILMN_1799150	1	1p13.2	PPM1J	protein phosphatase, Mg2+/Mn2+ dependent 1J	333926	0.61509	0.000155692
2760102	ILMN_1675483	2	2q37.3	ANKMY1	ankyrin repeat and MYND domain containing 1	51281	0.615296	0.00545244
6620437	ILMN_1753613	7	7p15.2	HOXA5	homeobox A5	3202	0.61559	0.00159272
1850435	ILMN_1697916	11	11p11.2	LARGE2	LARGE xylosyl- and glucuronyltransferase 2	120071	0.615828	0.0201974
2640437	ILMN_2356574	2	2p23.3	GTF3C2	general transcription factor IIIC subunit 2	2976	0.615931	0.00123216
1940427	ILMN_3273229	NA	NA	NA	NA		0.616392	0.0034623
3060470	ILMN_1804451	15	15q21.2	LEO1	LEO1 homolog, Paf1/RNA polymerase II complex component	123169	0.616444	0.00834153
6250427	ILMN_3247139	17	17q12	EPOP	elongin BC and polycomb repressive complex 2 associated protein	100170841	0.61675	0.00858532
5490612	ILMN_1753500	10	10p11.22	ARHGAP12	Rho GTPase activating protein 12	94134	0.61723	0.00356972
70576	ILMN_1758333	22	22q12.3	HMGXB4	HMG-box containing 4	10042	0.617482	0.0158153
1400358	ILMN_3253579	19	19p13.11	HAUS8	HAUS augmin like complex subunit 8	93323	0.617493	0.0021464
1510674	ILMN_1793578	9	9q32	ZFP37	ZFP37 zinc finger protein	7539	0.617735	0.0144555
830224	ILMN_1686531	22	22q11.23	GGT1	gamma-glutamyltransferase 1	2678	0.618543	0.00908867
6560131	ILMN_2225608	6	6q13	FAM135A	family with sequence similarity 135 member A	57579	0.618739	0.00317796
3310242	ILMN_2168347	19	19p13.2	EPOR	erythropoietin receptor	2057	0.61895	0.00364546
2190255	ILMN_2331232	NA	NA	NA	NA		0.619148	0.00180103
1780450	ILMN_1806705	9	9q34.11	ASB6	ankyrin repeat and SOCS box containing 6	140459	0.619268	0.0126884
380014	ILMN_1666553	17	17q25.1	SLC25A19	solute carrier family 25 member 19	60386	0.620135	0.00045492
1940228	ILMN_1770623	X	Xq28	CCNQ	cyclin Q	92002	0.620472	0.000185885
4850079	ILMN_1728626	9	9q34.2	WDR5	WD repeat domain 5	11091	0.620782	0.00326779
6980377	ILMN_2152178	15	15q13.3	FAN1	FANCD2 and FANCI associated nuclease 1	22909	0.620835	0.00521488
3290152	ILMN_1778560	7	7q22.1	ZNF3	zinc finger protein 3	7551	0.621037	0.00734008
5050608	ILMN_1664231	10	10q11.22	TIMM23	translocase of inner mitochondrial membrane 23	100287932	0.621053	0.000111138
3450632	ILMN_1761762	NA	NA	NA	NA		0.621543	0.0256909
3800243	ILMN_1741985	12	12q21.2	BBS10	Bardet-Biedl syndrome 10	79738	0.621659	0.00127839
6480082	ILMN_1732060	11	11p11.2	ARHGAP1	Rho GTPase activating protein 1	392	0.621892	1.93812e-05
3940435	ILMN_1801616	12	12p13.1	EMP1	epithelial membrane protein 1	2012	0.62201	2.7414e-05
6650554	ILMN_1828216	NA	NA	NA	NA		0.622117	0.00151608
4180142	ILMN_2102960	15	15q21.2-q21.3	FAM214A	family with sequence similarity 214 member A	56204	0.62235	0.0178603
6960332	ILMN_1771841	11	11q13.1	FOSL1	FOS like 1, AP-1 transcription factor subunit	8061	0.622541	0.0181854
3190364	ILMN_2372379	15	15q15.1	MGA	MGA, MAX dimerization protein	23269	0.622748	0.00200235
5900678	ILMN_3250899	NA	NA	NA	NA		0.623004	0.00479006
2360376	ILMN_1701655	12	12q24.13	SLC8B1	solute carrier family 8 member B1	80024	0.623464	0.000951562
6280209	ILMN_1792660	1	1q32.1	CAMSAP2	calmodulin regulated spectrin associated protein family member 2	23271	0.6235	0.0012162
3420097	ILMN_1733703	22	22q13.31	TRMU	tRNA 5-methylaminomethyl-2-thiouridylate methyltransferase	55687	0.623542	0.0249334
6350240	ILMN_2086238	17	17p13.3	SMYD4	SET and MYND domain containing 4	114826	0.623571	0.00264969
3990500	ILMN_3249059	1	1p35.3	SNHG12	small nucleolar RNA host gene 12	85028	0.623949	0.0424724
2360356	ILMN_1730670	19	19p13.3	FSTL3	follistatin like 3	10272	0.624395	0.000962482
6110468	ILMN_1760209	15	15q22.1-q22.2	RNF111	ring finger protein 111	54778	0.624792	0.00759365
5720070	ILMN_1661424	4	4q21.1	THAP6	THAP domain containing 6	152815	0.625038	6.3011e-05
540411	ILMN_2311089	17	17q21.31	BRCA1	BRCA1, DNA repair associated	672	0.625366	0.00240249
7100044	ILMN_2182335	12	12q12	ARID2	AT-rich interaction domain 2	196528	0.626065	0.0023623
20139	ILMN_1723837	1	1p13.3	SLC6A17	solute carrier family 6 member 17	388662	0.626423	0.00541238
7050612	ILMN_2358560	6	6q25.2-q25.3	TIAM2	T cell lymphoma invasion and metastasis 2	26230	0.626518	0.0160789
270706	ILMN_1742534	X	Xq22.3	COL4A5	collagen type IV alpha 5 chain	1287	0.62656	0.00388026
3840719	ILMN_1772845	12	12q24.31	SNRNP35	small nuclear ribonucleoprotein U11/U12 subunit 35	11066	0.6266	0.00470871
3130370	ILMN_2190414	19	19q13.41	ZNF83	zinc finger protein 83	55769	0.626984	0.0477096
6760343	ILMN_1659365	NA	NA	NA	NA		0.627106	0.00800129
6580685	ILMN_2413899	10	10p13	MCM10	minichromosome maintenance 10 replication initiation factor	55388	0.62718	0.0389283
1090367	ILMN_1805826	13	13q33.1	BIVM	basic, immunoglobulin-like variable motif containing	54841	0.628573	0.00391397
1850156	ILMN_1725338	8	8p23.1	CLDN23	claudin 23	137075	0.629026	5.82504e-05
2070025	ILMN_2050654	14	14q22.1	SAV1	salvador family WW domain containing protein 1	60485	0.629827	0.00138382
10440	ILMN_1679177	2	2q33.1	MARS2	methionyl-tRNA synthetase 2, mitochondrial	92935	0.629927	0.000356094
2190687	ILMN_1684591	16	16p13.3	ZSCAN32	zinc finger and SCAN domain containing 32	54925	0.630305	8.73429e-06
3890414	ILMN_1827211	NA	NA	NA	NA		0.630953	0.00581276
3400070	ILMN_2137066	8	8q24.3	ZNF7	zinc finger protein 7	7553	0.63104	0.00260618
1110017	ILMN_1663090	21	21q22.11	SON	SON DNA binding protein	6651	0.631219	0.00027039
3930059	ILMN_1669502	6	6p22.3	E2F3	E2F transcription factor 3	1871	0.63157	0.00025739
1260014	ILMN_1839719	NA	NA	NA	NA		0.63168	0.000654288
2350563	ILMN_1652085	2	2p13.3	MPHOSPH10	M-phase phosphoprotein 10	10199	0.631935	0.000588908
3940132	ILMN_2334210	17	17q25.1	ITGB4	integrin subunit beta 4	3691	0.632349	0.00435009
2600064	ILMN_1827413	NA	NA	NA	NA		0.632459	0.00425053
1500048	ILMN_2275803	17	17q25.3	LRRC45	leucine rich repeat containing 45	201255	0.633505	0.0199632
1260543	ILMN_1811592	10	c("10p12.1", "10p12.3")	ARHGAP21	Rho GTPase activating protein 21	57584	0.634286	0.000807887
5870136	ILMN_1796423	9	9q34.3	CLIC3	chloride intracellular channel 3	9022	0.63478	0.00284687
4670343	ILMN_1764729	14	14q32.33	JAG2	jagged 2	3714	0.63521	0.0013283
6370736	ILMN_1755419	X	Xp22.12	EIF1AX	eukaryotic translation initiation factor 1A X-linked	1964	0.635345	0.017959
5700273	ILMN_3236423	1	1q41	RAB3GAP2	RAB3 GTPase activating non-catalytic protein subunit 2	25782	0.635394	0.00239206
2970133	ILMN_1698950	21	21q22.3	PWP2	PWP2, small subunit processome component	5822	0.636592	0.00137763
5900445	ILMN_1675709	20	20q13.33	ARFGAP1	ADP ribosylation factor GTPase activating protein 1	55738	0.636676	0.00204219
6480379	ILMN_3250592	16	16p13.3	EEF2KMT	eukaryotic elongation factor 2 lysine methyltransferase	196483	0.636764	0.0349008
5670735	ILMN_2337789	19	19p13.2	MARCH2	membrane associated ring-CH-type finger 2	51257	0.636815	0.0121125
6650612	ILMN_1765523	11	11p15.5	TOLLIP	toll interacting protein	54472	0.63734	0.00272225
6350280	ILMN_1764654	NA	NA	NA	NA		0.637912	0.0182898
4060187	ILMN_2415267	6	6p24.3	RREB1	ras responsive element binding protein 1	6239	0.638405	0.000663308
1050132	ILMN_1682449	4	4p16.1	ZNF518B	zinc finger protein 518B	85460	0.638617	0.00164131
2340414	ILMN_1873620	10	10q23.1	TSPAN14	tetraspanin 14	81619	0.638727	0.029499
6350437	ILMN_1691290	3	3p21.31	CELSR3	cadherin EGF LAG seven-pass G-type receptor 3	1951	0.639043	0.0190845
1510014	ILMN_1810922	21	21q22.3	PCNT	pericentrin	5116	0.639957	0.00457745
4830349	ILMN_2149292	3	3p25.2	TMEM40	transmembrane protein 40	55287	0.640213	3.28663e-05
5490014	ILMN_1782129	22	22q13.33	ZBED4	zinc finger BED-type containing 4	9889	0.640733	3.61423e-06
6590240	ILMN_1711087	NA	NA	NA	NA		0.641199	0.00165951
7040682	ILMN_1837428	18	18q21.2	RAB27B	RAB27B, member RAS oncogene family	5874	0.641806	0.0175188
2650471	ILMN_3245310	19	19p13.3	YJU2	YJU2 splicing factor homolog	55702	0.642286	0.0209971
5870687	ILMN_1810891	16	16p11.2	ZNF629	zinc finger protein 629	23361	0.642332	0.0172062
20653	ILMN_1743402	14	14q23.1	SIX4	SIX homeobox 4	51804	0.642517	0.000687741
2360551	ILMN_1807439	15	15q26.3	ALDH1A3	aldehyde dehydrogenase 1 family member A3	220	0.643038	0.000686158
2030091	ILMN_1671600	19	19q13.42	EPS8L1	EPS8 like 1	54869	0.643137	0.0168634
6760037	ILMN_2336609	11	11q14.1	SYTL2	synaptotagmin like 2	54843	0.643997	0.00724355
5390132	ILMN_3223813	11	11q13.1	FOSL1	FOS like 1, AP-1 transcription factor subunit	8061	0.644093	0.00840188
4670193	ILMN_1740633	10	10q22.1	PRF1	perforin 1	5551	0.644285	0.00161397
3370746	ILMN_1659937	6	6q21	ZBTB24	zinc finger and BTB domain containing 24	9841	0.644949	1.02629e-05
6520577	ILMN_2285618	21	21q22.3	DIP2A	disco interacting protein 2 homolog A	23181	0.645652	0.0254377
50196	ILMN_1782863	6	6p12.1	FAM83B	family with sequence similarity 83 member B	222584	0.645684	0.00302503
5080048	ILMN_2392818	2	2p13.1	RTKN	rhotekin	6242	0.645836	0.00342378
3800097	ILMN_2405031	7	7q33-q34	TRIM24	tripartite motif containing 24	8805	0.646009	0.00402794
3290161	ILMN_2049417	19	19q13.42	TMEM86B	transmembrane protein 86B	255043	0.646046	0.00298882
2320286	ILMN_1764177	6	6p22.3	JARID2	jumonji and AT-rich interaction domain containing 2	3720	0.646348	1.22771e-05
270343	ILMN_1754531	15	15q21.2	AP4E1	adaptor related protein complex 4 subunit epsilon 1	23431	0.646727	2.99727e-05
6840328	ILMN_1682738	15	15q22.33	SMAD3	SMAD family member 3	4088	0.646877	1.64247e-05
5310332	ILMN_1667577	15	15q15.3	LCMT2	leucine carboxyl methyltransferase 2	9836	0.646898	0.000363406
4070289	ILMN_1747241	2	2q14.3	IWS1	IWS1, SUPT6H interacting protein	55677	0.647047	0.000207812
4900484	ILMN_1685661	1	1q41	RRP15	ribosomal RNA processing 15 homolog	51018	0.647337	0.00317233
2470196	ILMN_1794056	9	9p13.3	DNAJB5	DnaJ heat shock protein family (Hsp40) member B5	25822	0.647506	0.000382584
4570576	ILMN_1882000	X	Xp22.2	TXLNG	taxilin gamma	55787	0.647654	5.77312e-05
940672	ILMN_1680104	11	11p11.2	SLC35C1	solute carrier family 35 member C1	55343	0.647793	0.00780478
520333	ILMN_1701487	16	16p11.2	TAOK2	TAO kinase 2	9344	0.648097	0.0219707
5570445	ILMN_1692664	22	22q13.31	PRR5	proline rich 5	55615	0.648293	0.00126267
3120709	ILMN_1692390	12	12q13.11-q13.12	CCNT1	cyclin T1	904	0.64842	0.0337582
2760309	ILMN_1839019	3	3q27.3-q28	LPP	LIM domain containing preferred translocation partner in lipoma	4026	0.648422	0.000366289
1300187	ILMN_1660723	19	19q13.42	RDH13	retinol dehydrogenase 13	112724	0.649586	0.00610764
5310458	ILMN_1687316	1	1p34.3	NCDN	neurochondrin	23154	0.649698	0.0211944
5690603	ILMN_1675671	21	21q22.3	ICOSLG	inducible T cell costimulator ligand	23308	0.649915	0.00313073
730040	ILMN_1715684	1	1q32.2	LAMB3	laminin subunit beta 3	3914	0.650904	0.000323814
510341	ILMN_1705310	17	17q22	VEZF1	vascular endothelial zinc finger 1	7716	0.650912	1.07101e-06
6510408	ILMN_3241870	11	11q13.1	FRMD8	FERM domain containing 8	83786	0.650937	0.000704562
6330754	ILMN_1776325	1	1q21.3	UBE2Q1	ubiquitin conjugating enzyme E2 Q1	55585	0.651495	0.00188325
2510692	ILMN_2395285	12	12q24.31	SNRNP35	small nuclear ribonucleoprotein U11/U12 subunit 35	11066	0.652469	0.0151429
7610279	ILMN_1658902	11	11p15.5	DEAF1	DEAF1 transcription factor	10522	0.653052	0.0127152
4260176	ILMN_1737953	17	17q22	MKS1	Meckel syndrome, type 1	54903	0.653723	0.00703004
2340500	ILMN_1702738	19	19q13.32	KLC3	kinesin light chain 3	147700	0.654395	0.000171214
3130180	ILMN_1798083	19	19p13.11	CHERP	calcium homeostasis endoplasmic reticulum protein	10523	0.654411	0.00121822
5890435	ILMN_1671489	11	11q13.2	PC	pyruvate carboxylase	5091	0.65474	0.00154068
20040	ILMN_2404512	1	1q42.13	PSEN2	presenilin 2	5664	0.655269	0.00962203
630110	ILMN_1803745	12	12q13.2	SUOX	sulfite oxidase	6821	0.655759	0.000146735
3130768	ILMN_1747935	3	3q13.33	GOLGB1	golgin B1	2804	0.655851	0.00278463
520092	ILMN_1656254	NA	NA	NA	NA		0.656999	0.00101177
5810278	ILMN_1682929	11	11q14.1	SYTL2	synaptotagmin like 2	54843	0.657411	0.00676413
5910326	ILMN_1724059	22	22q12.2	GAS2L1	growth arrest specific 2 like 1	10634	0.658021	0.00849763
870497	ILMN_2384785	19	19q12	CCNE1	cyclin E1	898	0.658488	0.00300856
3940451	ILMN_1803590	12	12q21.1	ZFC3H1	zinc finger C3H1-type containing	196441	0.660835	0.0196472
3390551	ILMN_1657111	14	14q32.33	AHNAK2	AHNAK nucleoprotein 2	113146	0.660911	0.000197556
6510661	ILMN_1676625	20	20q13.33	SS18L1	SS18L1, nBAF chromatin remodeling complex subunit	26039	0.661042	0.0214716
3850722	ILMN_2231020	2	2q14.2	TMEM185B	transmembrane protein 185B	79134	0.661295	0.000322893
6100382	ILMN_1680591	2	2p13.1	RTKN	rhotekin	6242	0.662364	1.60859e-05
1940128	ILMN_1737252	8	8p12	NRG1	neuregulin 1	3084	0.662749	0.000131248
6200041	ILMN_1761915	21	21q22.2	BRWD1	bromodomain and WD repeat domain containing 1	54014	0.663219	0.00563782
630341	ILMN_1792733	19	19q13.32	FOXA3	forkhead box A3	3171	0.66363	0.000186271
2190689	ILMN_1802151	11	11p15.4	OSBPL5	oxysterol binding protein like 5	114879	0.663874	2.60774e-05
6900731	ILMN_2357781	1	1p36.12	ZNF436	zinc finger protein 436	80818	0.664668	0.000908793
730020	ILMN_1797298	17	17q25.1	ARMC7	armadillo repeat containing 7	79637	0.665302	0.000348151
520255	ILMN_1702636	18	18p11.21	TUBB6	tubulin beta 6 class V	84617	0.666149	0.000319592
6560066	ILMN_1772302	NA	NA	NA	NA		0.666632	0.00422342
3140039	ILMN_1775943	14	14q13.2	BRMS1L	BRMS1 like transcriptional repressor	84312	0.66691	0.0207756
1850296	ILMN_1794233	7	7q32.3	LINC-PINT	long intergenic non-protein coding RNA, p53 induced transcript	378805	0.667095	0.000257032
3840360	ILMN_2347888	12	12q13.12	LARP4	La ribonucleoprotein domain family member 4	113251	0.667539	0.00111984
3460468	ILMN_1690690	10	10q26.11-q26.12	SEC23IP	SEC23 interacting protein	11196	0.667916	6.11419e-05
4070397	ILMN_1813027	5	5q35.3	TRIM41	tripartite motif containing 41	90933	0.668637	0.0107351
520451	ILMN_1818149	NA	NA	NA	NA		0.669339	0.0482381
2190537	ILMN_1809866	11	11q12.3	WDR74	WD repeat domain 74	54663	0.669935	0.00386163
6220180	ILMN_1731064	1	1q42.13	COQ8A	coenzyme Q8A	56997	0.66997	2.29414e-05
1850482	ILMN_1669703	3	3q29	TNK2	tyrosine kinase non receptor 2	10188	0.670022	0.000847771
1190524	ILMN_1791531	16	16q23.1	FA2H	fatty acid 2-hydroxylase	79152	0.670238	0.00059605
730093	ILMN_1789166	19	19p13.3	SHD	Src homology 2 domain containing transforming protein D	56961	0.671162	0.0219709
2650678	ILMN_1788223	6	6q25.3	RSPH3	radial spoke head 3 homolog	83861	0.671195	0.00204399
6040286	ILMN_1738095	2	2q37.3	PER2	period circadian regulator 2	8864	0.67126	8.52718e-05
4830328	ILMN_1738718	3	3p21.31	CYB561D2	cytochrome b561 family member D2	11068	0.672359	0.00565411
290132	ILMN_1693004	20	20q11.23	SOGA1	suppressor of glucose, autophagy associated 1	140710	0.672834	0.00774273
2480156	ILMN_1742923	19	19q13.43	ZNF584	zinc finger protein 584	201514	0.672974	0.00371009
5720019	ILMN_1828083	NA	NA	NA	NA		0.6732	0.000439523
1770187	ILMN_2226304	4	4q28.1	ANKRD50	ankyrin repeat domain 50	57182	0.673525	0.000274052
4290014	ILMN_1663667	1	1q21.3	FLAD1	flavin adenine dinucleotide synthetase 1	80308	0.673846	0.00112619
4040605	ILMN_1714417	1	1q42.13	PSEN2	presenilin 2	5664	0.673876	0.000146557
4920669	ILMN_1811489	3	3p22.2	OXSR1	oxidative stress responsive 1	9943	0.674098	1.3626e-07
5900605	ILMN_1734096	10	10q25.3	DCLRE1A	DNA cross-link repair 1A	9937	0.67432	0.00634845
1660681	ILMN_1796762	16	16q21	CCDC102A	coiled-coil domain containing 102A	92922	0.676201	0.000158552
380594	ILMN_2197030	14	14q32.33	ZFYVE21	zinc finger FYVE-type containing 21	79038	0.676871	1.97658e-05
6040747	ILMN_1747504	1	1q44	AHCTF1	AT-hook containing transcription factor 1	25909	0.677331	0.00491109
5700167	ILMN_1767219	6	6p21.1	POLR1C	RNA polymerase I and III subunit C	9533	0.677569	6.55783e-05
6400735	ILMN_1809783	10	10q23.2	FAM25A	family with sequence similarity 25 member A	643161	0.677695	0.00839597
3140408	ILMN_1757882	8	8q24.3	PPP1R16A	protein phosphatase 1 regulatory subunit 16A	84988	0.678234	0.000176894
450300	ILMN_1794470	17	17p13.2	ANKFY1	ankyrin repeat and FYVE domain containing 1	51479	0.678823	3.80322e-05
6480474	ILMN_1659058	6	6p21.33	PPP1R10	protein phosphatase 1 regulatory subunit 10	5514	0.680043	0.00290854
650563	ILMN_1701457	16	16p13.3	FAHD1	fumarylacetoacetate hydrolase domain containing 1	81889	0.680435	0.00514432
4150279	ILMN_1795286	6	6p21.33	C6orf47	chromosome 6 open reading frame 47	57827	0.680665	0.000590599
580026	ILMN_1780298	16	16p13.3	EEF2KMT	eukaryotic elongation factor 2 lysine methyltransferase	196483	0.68123	0.0104442
3450037	ILMN_3239946	3	3q22.1	FAM86HP	family with sequence similarity 86, member A pseudogene	729375	0.682959	0.00245763
6220470	ILMN_1697117	6	6q27	TBP	TATA-box binding protein	6908	0.683611	0.000470163
430731	ILMN_1724986	3	3q29	WDR53	WD repeat domain 53	348793	0.684103	0.000127333
3370255	ILMN_1811301	9	9q34.3	INPP5E	inositol polyphosphate-5-phosphatase E	56623	0.684222	0.00278682
2570441	ILMN_2408102	22	22q12.1	TFIP11	tuftelin interacting protein 11	24144	0.685092	0.000144511
5130167	ILMN_1689585	20	20p13	C20orf194	chromosome 20 open reading frame 194	25943	0.685099	0.00124928
7510424	ILMN_2229922	12	12p11.21	KIAA1551	KIAA1551	55196	0.685813	0.000464088
2350156	ILMN_3247848	19	19q13.41	SPACA6	sperm acrosome associated 6	147650	0.686178	0.00343589
4230368	ILMN_2275248	3	3q27.1	ECE2	endothelin converting enzyme 2	9718	0.68706	0.00130804
4730019	ILMN_1654563	X	Xq13.1	EFNB1	ephrin B1	1947	0.687416	0.0157894
3450113	ILMN_1809323	9	9q31.1	TMEM246	transmembrane protein 246	84302	0.687914	0.000377494
5080037	ILMN_1709870	1	1p36.31	HES2	hes family bHLH transcription factor 2	54626	0.688144	0.00202553
4760520	ILMN_2103720	8	8q11.23	MRPL15	mitochondrial ribosomal protein L15	29088	0.689284	0.000646548
6280626	ILMN_2251978	21	21q22.11	PAXBP1	PAX3 and PAX7 binding protein 1	94104	0.689785	0.00644357
3990546	ILMN_1689968	15	15q22.31	PLEKHO2	pleckstrin homology domain containing O2	80301	0.690112	0.00177952
2490204	ILMN_2155516	3	3q13.31	QTRT2	queuine tRNA-ribosyltransferase accessory subunit 2	79691	0.690372	1.28296e-05
4120348	ILMN_1789504	15	15q24.2	PTPN9	protein tyrosine phosphatase, non-receptor type 9	5780	0.690409	0.00783481
1780403	ILMN_1687743	14	14q32.12	BTBD7	BTB domain containing 7	55727	0.691014	0.000199082
3850292	ILMN_1813938	3	3p25.1	CHCHD4	coiled-coil-helix-coiled-coil-helix domain containing 4	131474	0.691506	1.45412e-05
3170239	ILMN_1754121	15	15q24.1	CSK	C-terminal Src kinase	1445	0.691653	0.000231169
5560411	ILMN_1684964	7	7q36.1	ZNF212	zinc finger protein 212	7988	0.692542	3.73005e-05
5490524	ILMN_2307450	19	19q13.11	ZNF302	zinc finger protein 302	55900	0.692923	0.00988577
7210280	ILMN_2044293	13	13q14.11	KBTBD7	kelch repeat and BTB domain containing 7	84078	0.693031	0.00437626
4200008	ILMN_1756006	11	11q13.1	ATG2A	autophagy related 2A	23130	0.693098	0.000975444
5820672	ILMN_1652762	22	22q11.21	HIC2	HIC ZBTB transcriptional repressor 2	23119	0.693108	0.000489999
2650193	ILMN_1663042	20	20q13.12	SDC4	syndecan 4	6385	0.693645	7.26384e-05
1770195	ILMN_1735908	5	5q13.2	UTP15	UTP15, small subunit processome component	84135	0.69365	0.0140242
1190497	ILMN_2350114	13	13q14.2	TRIM13	tripartite motif containing 13	10206	0.694214	0.000543826
4780524	ILMN_2352574	19	19q13.43	ZNF274	zinc finger protein 274	10782	0.694504	0.00144041
7560538	ILMN_1752283	20	20q11.22	ITCH	itchy E3 ubiquitin protein ligase	83737	0.694564	0.00117446
3940189	ILMN_1683178	9	9p24.1	JAK2	Janus kinase 2	3717	0.695241	0.00956631
990121	ILMN_1744830	15	15q13.3	ARHGAP11A	Rho GTPase activating protein 11A	9824	0.695258	0.00389623
2350338	ILMN_1771260	12	12q24.31	B3GNT4	UDP-GlcNAc:betaGal beta-1,3-N-acetylglucosaminyltransferase 4	79369	0.695878	0.00140765
3450458	ILMN_1754126	1	1p36.12	SH2D5	SH2 domain containing 5	400745	0.696001	0.000938927
5360671	ILMN_3240092	11	11q21	MED17	mediator complex subunit 17	9440	0.696612	0.00234015
6580692	ILMN_2312906	1	1q41	MIA3	MIA SH3 domain ER export factor 3	375056	0.6974	0.0101192
6380112	ILMN_1723706	22	22q13.31	GRAMD4	GRAM domain containing 4	23151	0.697425	0.000804226
3610072	ILMN_1735045	22	22q13.2	A4GALT	alpha 1,4-galactosyltransferase (P blood group)	53947	0.697589	0.000139899
7330674	ILMN_2222008	6	6p21.32	KIFC1	kinesin family member C1	3833	0.697741	0.000285246
3440041	ILMN_2344079	20	20q13.33	ZGPAT	zinc finger CCCH-type and G-patch domain containing	84619	0.697964	0.0145725
4040397	ILMN_1775822	22	22q13.1	PDGFB	platelet derived growth factor subunit B	5155	0.69853	0.011087
1510630	ILMN_1811650	16	16q22.1	DUS2	dihydrouridine synthase 2	54920	0.698538	5.43972e-05
5860519	ILMN_1666894	15	15q24.2	CSPG4	chondroitin sulfate proteoglycan 4	1464	0.69906	6.70193e-06
6290161	ILMN_1732410	10	10q21.2	SLC16A9	solute carrier family 16 member 9	220963	0.699536	0.00173329
7380327	ILMN_1771139	16	16q24.2	FBXO31	F-box protein 31	79791	0.700554	0.000434248
6960056	ILMN_1673252	7	7p22.1	AIMP2	aminoacyl tRNA synthetase complex interacting multifunctional protein 2	7965	0.700996	0.000347988
5910553	ILMN_2360730	7	7q31.2	CAV2	caveolin 2	858	0.701414	0.000220584
7000619	ILMN_1717334	19	19p13.3	VAV1	vav guanine nucleotide exchange factor 1	7409	0.701677	0.00240705
7380368	ILMN_1789775	11	11q12.3	WDR74	WD repeat domain 74	54663	0.702385	0.000115038
4180717	ILMN_1656482	20	20q13.33	OSBPL2	oxysterol binding protein like 2	9885	0.704599	4.81068e-05
4010414	ILMN_1679460	12	12p11.23-p11.22	PPFIBP1	PPFIA binding protein 1	8496	0.705346	0.000700926
5870605	ILMN_1900661	NA	NA	NA	NA		0.705652	9.14928e-05
3170520	ILMN_2398847	16	16p12.1	ARHGAP17	Rho GTPase activating protein 17	55114	0.706268	7.20301e-05
6560017	ILMN_2402600	9	9p24.2	GLIS3	GLIS family zinc finger 3	169792	0.706274	0.00378708
110132	ILMN_2234310	1	1p36.33	CPTP	ceramide-1-phosphate transfer protein	80772	0.707226	0.000439117
130408	ILMN_1756525	1	1q25.1	KLHL20	kelch like family member 20	27252	0.707978	0.0016181
6900209	ILMN_1713751	5	5q33.3	ADAM19	ADAM metallopeptidase domain 19	8728	0.708382	5.20389e-05
4010072	ILMN_1751051	7	7p14.1	C7orf25	chromosome 7 open reading frame 25	79020	0.709452	0.000474977
7400209	ILMN_1654823	NA	NA	NA	NA		0.709505	0.0116221
2970594	ILMN_2350574	19	19q13.42	MYADM	myeloid associated differentiation marker	91663	0.709816	0.00154986
360445	ILMN_2407482	20	20p13	ITPA	inosine triphosphatase	3704	0.709822	0.00409303
3850255	ILMN_2283196	20	20q13.12	ZSWIM3	zinc finger SWIM-type containing 3	140831	0.710883	0.00126998
3710040	ILMN_1806607	1	1p36.11	SFN	stratifin	2810	0.711361	0.00112653
5890241	ILMN_1798061	14	14q24.1	ZFYVE26	zinc finger FYVE-type containing 26	23503	0.712158	0.00358285
5490102	ILMN_1745423	4	4q13.3	UTP3	UTP3, small subunit processome component	57050	0.712864	0.00275882
5270343	ILMN_1774589	1	1p35.2	IQCC	IQ motif containing C	55721	0.713393	0.0018116
5310100	ILMN_1705241	9	9q22.33	TDRD7	tudor domain containing 7	23424	0.713546	0.000309412
1230746	ILMN_1779677	9	9q21.33	TUT7	terminal uridylyl transferase 7	79670	0.713549	0.000364723
6250093	ILMN_1733511	12	12q24.33	GOLGA3	golgin A3	2802	0.713563	3.53318e-05
1070180	ILMN_3239168	11	11q13.2	FAM86C2P	family with sequence similarity 86, member A pseudogene	645332	0.714482	0.00662073
840706	ILMN_1656942	X	Xp11.23	PRICKLE3	prickle planar cell polarity protein 3	4007	0.714547	0.00111261
2600403	ILMN_3247159	9	9p22.1	SCARNA8	small Cajal body-specific RNA 8	677776	0.716787	0.0163057
2450682	ILMN_1893764	19	19q13.32	CCDC61	coiled-coil domain containing 61	729440	0.716858	0.000113322
6220327	ILMN_1747771	4	4p16.3	MAEA	macrophage erythroblast attacher	10296	0.717315	1.056e-05
2630370	ILMN_2358069	7	7p22.3	MAD1L1	mitotic arrest deficient 1 like 1	8379	0.717348	0.00369461
1980670	ILMN_1746801	1	1q21.3	CGN	cingulin	57530	0.718209	6.4417e-05
7210093	ILMN_1716265	11	11q13.4	PGM2L1	phosphoglucomutase 2 like 1	283209	0.71888	0.00269028
2490068	ILMN_1699254	14	14q24.1	PLEKHH1	pleckstrin homology, MyTH4 and FERM domain containing H1	57475	0.719322	0.00399104
7000086	ILMN_1803476	6	6p21.31	KCTD20	potassium channel tetramerization domain containing 20	222658	0.71979	0.00499453
3990201	ILMN_1708203	4	4q31.21	OTUD4	OTU deubiquitinase 4	54726	0.720619	2.84234e-05
1050180	ILMN_1772540	16	16q23.2	ATMIN	ATM interactor	23300	0.721316	0.000189828
3850347	ILMN_2112744	22	22q11.21	P2RX6P	purinergic receptor P2X 6 pseudogene	440799	0.721856	0.000638848
5700324	ILMN_1742147	X	Xq28	UBL4A	ubiquitin like 4A	8266	0.722943	3.57586e-06
4860367	ILMN_2370464	3	3p21.31	ATRIP	ATR interacting protein	84126	0.723098	4.60377e-06
4850088	ILMN_2342903	19	19p13.12	GIPC1	GIPC PDZ domain containing family member 1	10755	0.723133	0.0146172
60609	ILMN_1705447	16	16q24.3	AFG3L1P	AFG3 like matrix AAA peptidase subunit 1, pseudogene	172	0.723805	0.0164564
2810022	ILMN_1757415	1	1p32.3	COA7	cytochrome c oxidase assembly factor 7 (putative)	65260	0.724165	0.00289285
6270093	ILMN_1794959	1	1q42.2	SLC35F3	solute carrier family 35 member F3	148641	0.724447	0.00692632
2760068	ILMN_1836218	5	5p15.33	PP7080	uncharacterized LOC25845	25845	0.724732	0.000146906
5820427	ILMN_1806328	1	1p36.11	PDIK1L	PDLIM1 interacting kinase 1 like	149420	0.725387	0.000883352
2570139	ILMN_1677532	1	1p36.22	TARDBP	TAR DNA binding protein	23435	0.725585	0.0282774
990372	ILMN_1651282	10	10q25.1	COL17A1	collagen type XVII alpha 1 chain	1308	0.726762	0.000332043
4120133	ILMN_1668283	3	3p21.31	HYAL2	hyaluronidase 2	8692	0.726791	0.00160766
7040220	ILMN_1705469	NA	NA	NA	NA		0.726988	0.00024789
770408	ILMN_1744381	7	7q22.1	SERPINE1	serpin family E member 1	5054	0.727073	0.000126795
4210326	ILMN_1727218	9	9q33.2	ZBTB6	zinc finger and BTB domain containing 6	10773	0.727869	0.000780058
5420719	ILMN_1661594	2	2p13.3	C2orf42	chromosome 2 open reading frame 42	54980	0.728127	0.000203648
1820133	ILMN_1781721	9	9q34.13	DDX31	DEAD-box helicase 31	64794	0.729203	6.87616e-05
1230296	ILMN_1805658	6	6q24.2	LTV1	LTV1 ribosome biogenesis factor	84946	0.729266	8.31221e-05
1010653	ILMN_1746686	6	6p21.1	POLR1C	RNA polymerase I and III subunit C	9533	0.730316	8.08673e-06
4260152	ILMN_2065606	1	1q23.3	TOMM40L	translocase of outer mitochondrial membrane 40 like	84134	0.730969	0.00872915
6960544	ILMN_2231021	2	2q14.2	TMEM185B	transmembrane protein 185B	79134	0.731724	0.000105055
240392	ILMN_1878029	NA	NA	NA	NA		0.732225	0.000706853
2900110	ILMN_1683533	3	3p14.3	CCDC66	coiled-coil domain containing 66	285331	0.732265	0.00171224
4850307	ILMN_3289262	1	1p36.11	PNRC2	proline rich nuclear receptor coactivator 2	55629	0.732871	3.51125e-05
2490170	ILMN_1706558	2	2p23.2	TRMT61B	tRNA methyltransferase 61B	55006	0.733606	0.00199382
510520	ILMN_1676361	10	10q11.22-q11.23	ARHGAP22	Rho GTPase activating protein 22	58504	0.734006	0.000707424
3290609	ILMN_1845086	NA	NA	NA	NA		0.7342	0.0166525
4880392	ILMN_1732609	9	9p13.3	FAM214B	family with sequence similarity 214 member B	80256	0.734265	0.000480471
940670	ILMN_1788783	6	6p12.2	TRAM2	translocation associated membrane protein 2	9697	0.735046	0.000703394
1470367	ILMN_2205050	X	Xp22.33	PRKX	protein kinase X-linked	5613	0.7352	0.000175582
7050180	ILMN_1699357	5	5q31.1	SLC22A5	solute carrier family 22 member 5	6584	0.735411	3.53875e-05
160561	ILMN_1718610	16	16p12.1	ARHGAP17	Rho GTPase activating protein 17	55114	0.735781	9.40306e-05
5910347	ILMN_1757230	8	8q24.3	ZNF250	zinc finger protein 250	58500	0.736343	0.000394964
3840215	ILMN_2401779	9	9q34.11	FAM102A	family with sequence similarity 102 member A	399665	0.737018	0.000178877
1690753	ILMN_2307978	19	19p13.3	ABHD17A	abhydrolase domain containing 17A	81926	0.738104	0.0177998
7380059	ILMN_1655068	17	17p11.2	TOM1L2	target of myb1 like 2 membrane trafficking protein	146691	0.738726	0.0121418
6590731	ILMN_1783806	6	6p22.3	DTNBP1	dystrobrevin binding protein 1	84062	0.73931	2.95135e-05
5890538	ILMN_1719985	19	19p13.3	FEM1A	fem-1 homolog A	55527	0.739637	0.00069133
3890187	ILMN_1813834	1	1p13.3	PRMT6	protein arginine methyltransferase 6	55170	0.740286	0.000637865
5270402	ILMN_1674662	15	15q26.1	TICRR	TOPBP1 interacting checkpoint and replication regulator	90381	0.740461	4.58311e-05
4760482	ILMN_1667405	9	9p13.3	ARHGEF39	Rho guanine nucleotide exchange factor 39	84904	0.740767	0.00272453
5700243	ILMN_1691849	11	11p14.1	LIN7C	lin-7 homolog C, crumbs cell polarity complex component	55327	0.740835	0.0287121
6280685	ILMN_1690695	15	15q26.1	PEX11A	peroxisomal biogenesis factor 11 alpha	8800	0.741453	0.000426381
20301	ILMN_3251303	3	3p25.1	NR2C2	nuclear receptor subfamily 2 group C member 2	7182	0.74149	0.0011934
1940563	ILMN_1843198	1	1p31.3	AK4	adenylate kinase 4	205	0.741911	1.92811e-06
3390373	ILMN_1706959	17	17p13.3	TIMM22	translocase of inner mitochondrial membrane 22	29928	0.742324	0.000525758
6620356	ILMN_2059505	15	15q21.2	ARPP19	cAMP regulated phosphoprotein 19	10776	0.742521	0.000342913
1430278	ILMN_1758895	1	1q21.3	CTSK	cathepsin K	1513	0.742874	0.0222567
580255	ILMN_1688625	6	6q21	CRYBG1	crystallin beta-gamma domain containing 1	202	0.742926	0.000669681
2320037	ILMN_1764851	20	20q13.12	TP53RK	TP53 regulating kinase	112858	0.743877	0.00066203
3170102	ILMN_2161556	12	12q24.22	C12orf49	chromosome 12 open reading frame 49	79794	0.744462	2.46808e-05
1740349	ILMN_1719581	1	1p36.11	MYOM3	myomesin 3	127294	0.74466	3.83066e-05
5910767	ILMN_2331231	NA	NA	NA	NA		0.744747	0.000408413
6520561	ILMN_1685540	4	4q21.1	SHROOM3	shroom family member 3	57619	0.745403	0.000422604
270646	ILMN_2186369	17	17p12-p11.2	NCOR1	nuclear receptor corepressor 1	9611	0.745684	0.00203068
1570598	ILMN_2317543	17	17q25.1	ITGB4	integrin subunit beta 4	3691	0.746321	0.00294995
7400114	ILMN_2185563	5	5q13.2	ANKRA2	ankyrin repeat family A member 2	57763	0.746705	0.000733113
3450681	ILMN_1716862	2	2p21	PPM1B	protein phosphatase, Mg2+/Mn2+ dependent 1B	5495	0.748847	2.55288e-05
6110246	ILMN_1759595	22	22q11.21	RTL10	retrotransposon Gag like 10	79680	0.749718	0.00241655
6370528	ILMN_1681221	NA	NA	NA	NA		0.749879	0.000236127
7380367	ILMN_3244065	9	9q34.3	TMEM250	transmembrane protein 250	90120	0.749945	0.000434078
4230445	ILMN_1694730	2	2q37.3	RNPEPL1	arginyl aminopeptidase like 1	57140	0.749955	0.00481339
150528	ILMN_2327090	4	4p16.3	MAEA	macrophage erythroblast attacher	10296	0.750024	0.000314081
1780538	ILMN_1806349	X	Xq28	SLC6A8	solute carrier family 6 member 8	6535	0.750391	0.00282694
1170072	ILMN_2150654	19	19p13.13-p13.12	ZSWIM4	zinc finger SWIM-type containing 4	65249	0.750631	0.000695829
2140368	ILMN_1772798	15	15q21.2	ARPP19	cAMP regulated phosphoprotein 19	10776	0.75159	0.00331231
2190725	ILMN_1703688	3	3q23	RASA2	RAS p21 protein activator 2	5922	0.752272	0.00334264
360259	ILMN_2241775	1	1q31.2	TROVE2	TROVE domain family member 2	6738	0.752775	6.85338e-06
6520669	ILMN_1706005	9	9p13.3	GALT	galactose-1-phosphate uridylyltransferase	2592	0.75321	0.000989397
150274	ILMN_1767542	15	15q23	THAP10	THAP domain containing 10	56906	0.75329	0.000232393
4060523	ILMN_2046024	2	2p13.1	DUSP11	dual specificity phosphatase 11	8446	0.754685	0.000183075
6580689	ILMN_1684873	X	Xp22.33	ARSD	arylsulfatase D	414	0.754788	0.000395454
4760014	ILMN_1698996	21	21q22.3	SLC19A1	solute carrier family 19 member 1	6573	0.756964	0.0133268
4850142	ILMN_1700733	15	15q21.2-q21.3	FAM214A	family with sequence similarity 214 member A	56204	0.75702	0.00258096
3450093	ILMN_1680129	5	5p15.31	NSUN2	NOP2/Sun RNA methyltransferase family member 2	54888	0.757283	0.000160188
1190167	ILMN_1716468	3	3q22.1	NUDT16P1	nudix hydrolase 16 pseudogene 1	152195	0.757465	0.00114981
3710739	ILMN_1832720	NA	NA	NA	NA		0.757768	0.00146293
1710639	ILMN_1743104	11	11q13.2	RBM4B	RNA binding motif protein 4B	83759	0.758034	2.00326e-07
780471	ILMN_1728710	19	19q13.41	ZNF816	zinc finger protein 816	125893	0.7586	0.000354133
1820195	ILMN_1786852	20	20p13	ZCCHC3	zinc finger CCHC-type containing 3	85364	0.759167	0.00194702
2320537	ILMN_1686985	X	Xq28	MTM1	myotubularin 1	4534	0.76005	0.00152344
4220647	ILMN_1730549	NA	NA	NA	NA		0.760309	0.00337153
6250064	ILMN_1708375	5	5q31.1	IRF1	interferon regulatory factor 1	3659	0.760508	0.0021729
5670088	ILMN_1654737	9	9q33.1	TRIM32	tripartite motif containing 32	22954	0.761491	8.59899e-06
160220	ILMN_2199284	12	12q24.11	ANAPC7	anaphase promoting complex subunit 7	51434	0.762176	0.013283
5960398	ILMN_1697220	6	6q14.3	NT5E	5'-nucleotidase ecto	4907	0.762884	0.00125617
5130594	ILMN_1805863	17	17p13.3	WDR81	WD repeat domain 81	124997	0.763055	0.0060976
2710746	ILMN_1672596	16	16q23.1	BCAR1	BCAR1, Cas family scaffold protein	9564	0.763777	0.00932166
3460270	ILMN_1774387	20	20q12	ZHX3	zinc fingers and homeoboxes 3	23051	0.764173	5.14293e-05
1400408	ILMN_1768773	NA	NA	NA	NA		0.766016	0.0042177
4830291	ILMN_2089458	1	1p21.2	SASS6	SAS-6 centriolar assembly protein	163786	0.766293	0.000140279
1990487	ILMN_1809086	3	3q23	XRN1	5'-3' exoribonuclease 1	54464	0.766604	6.51569e-05
4250167	ILMN_1683755	1	1q32.1	SOX13	SRY-box 13	9580	0.766707	1.76987e-05
430520	ILMN_1691333	19	19p13.3	ZNF57	zinc finger protein 57	126295	0.767176	0.000659473
6550025	ILMN_1693317	2	2p25.3	TRAPPC12	trafficking protein particle complex 12	51112	0.767396	1.5521e-05
4810377	ILMN_3307409	6	6p24.3	RREB1	ras responsive element binding protein 1	6239	0.768247	3.85225e-06
2900139	ILMN_1778144	12	12q13.11	SLC48A1	solute carrier family 48 member 1	55652	0.769338	0.00448958
3360445	ILMN_2349006	1	1q23.3	USP21	ubiquitin specific peptidase 21	27005	0.769922	5.23809e-07
2320408	ILMN_1760556	NA	NA	NA	NA		0.770122	0.0410504
870168	ILMN_1787193	19	19q13.2	CYP2S1	cytochrome P450 family 2 subfamily S member 1	29785	0.77056	0.00412191
4730152	ILMN_3257566	1	1q32.1	DSTYK	dual serine/threonine and tyrosine protein kinase	25778	0.774069	0.000144615
2750100	ILMN_3257884	22	22q12.3	HMGXB4	HMG-box containing 4	10042	0.775259	4.13696e-06
20553	ILMN_1655485	1	1q42.2	SPRTN	SprT-like N-terminal domain	83932	0.77668	5.33228e-05
3360544	ILMN_1689624	3	3q11.2	RIOX2	ribosomal oxygenase 2	84864	0.778127	0.00442131
2070619	ILMN_1805271	4	4p16.3	ZNF721	zinc finger protein 721	170960	0.77866	0.000947182
7200731	ILMN_1658104	13	13q14.11	KBTBD6	kelch repeat and BTB domain containing 6	89890	0.779019	0.00014729
2070195	ILMN_1677484	9	9q34.3	SNAPC4	small nuclear RNA activating complex polypeptide 4	6621	0.780184	0.000778265
6620600	ILMN_2223720	16	16q23.2	ATMIN	ATM interactor	23300	0.781689	0.00709601
7050682	ILMN_1713529	5	5q23.1	SEMA6A	semaphorin 6A	57556	0.782123	0.00259327
5700132	ILMN_1743643	3	3q21.3	ZXDC	ZXD family zinc finger C	79364	0.784373	5.55288e-05
50274	ILMN_1689774	4	4p16.1	MRFAP1L1	Morf4 family associated protein 1 like 1	114932	0.785638	0.00021119
840553	ILMN_1776213	5	5q15	RGMB	repulsive guidance molecule BMP co-receptor b	285704	0.786167	0.000457694
4290132	ILMN_2263144	11	11q12.3	TMEM223	transmembrane protein 223	79064	0.786383	0.00542478
5420110	ILMN_1745813	10	10q22.1	KIF1BP	KIF1 binding protein	26128	0.786735	0.000362067
2810730	ILMN_2322842	12	12q12	PPHLN1	periphilin 1	51535	0.786743	4.67396e-05
6450162	ILMN_1814106	9	9q34.3	CYSRT1	cysteine rich tail 1	375791	0.787219	0.000276309
6940397	ILMN_1741219	X	Xp11.21	RRAGB	Ras related GTP binding B	10325	0.787521	0.000772255
1430475	ILMN_1704472	19	19q13.2	EID2	EP300 interacting inhibitor of differentiation 2	163126	0.788165	0.00112738
7550307	ILMN_1793476	11	11p15.4	CAVIN3	caveolae associated protein 3	112464	0.788692	3.95277e-05
5340209	ILMN_1789616	7	7p15.3	NUPL2	nucleoporin like 2	11097	0.789669	1.98894e-05
6510368	ILMN_1710207	10	10q24.31	SLF2	SMC5-SMC6 complex localization factor 2	55719	0.790523	5.97765e-05
5670296	ILMN_1806946	17	17q21.31	UBTF	upstream binding transcription factor	7343	0.791168	0.0090911
4230035	ILMN_1732343	11	11q23.3	SIK3	SIK family kinase 3	23387	0.791268	0.00190691
3520382	ILMN_1722522	2	2q21.3	CCNT2	cyclin T2	905	0.792433	1.85185e-05
990017	ILMN_1806631	9	9q34.3	TMEM203	transmembrane protein 203	94107	0.793998	0.000634961
5310333	ILMN_2375360	X	Xq22.3	COL4A5	collagen type IV alpha 5 chain	1287	0.794368	8.94277e-05
5090309	ILMN_2143250	11	11p15.3	FAR1	fatty acyl-CoA reductase 1	84188	0.794952	0.000307103
5960450	ILMN_2358914	20	20q13.12	SLC35C2	solute carrier family 35 member C2	51006	0.795358	0.0013232
6620392	ILMN_1663080	7	7p22.3	LFNG	LFNG O-fucosylpeptide 3-beta-N-acetylglucosaminyltransferase	3955	0.795477	0.00251259
3360390	ILMN_1779470	11	11q23.3	ABCG4	ATP binding cassette subfamily G member 4	64137	0.795541	0.00162637
5960343	ILMN_1787509	20	20q13.33	HELZ2	helicase with zinc finger 2	85441	0.796124	0.000146717
7210040	ILMN_2096405	10	10p15.3	WDR37	WD repeat domain 37	22884	0.796984	9.4122e-06
1340047	ILMN_3245476	11	11p15.5	PHRF1	PHD and ring finger domains 1	57661	0.798074	3.68358e-05
430181	ILMN_1653501	3	3p21.31	SEMA3B	semaphorin 3B	7869	0.799496	0.00229709
460082	ILMN_2137208	1	1q32.1	GOLT1A	golgi transport 1A	127845	0.799913	3.62815e-05
4760154	ILMN_2412384	8	8q22.1	CCNE2	cyclin E2	9134	0.800334	0.000337687
430491	ILMN_1766593	11	11p15.5	PHRF1	PHD and ring finger domains 1	57661	0.800891	0.0147201
60092	ILMN_1662658	12	12q24.33	PUS1	pseudouridine synthase 1	80324	0.801764	5.07058e-06
4890341	ILMN_1684211	22	22q12.2	SEC14L2	SEC14 like lipid binding 2	23541	0.802509	0.000494003
2320722	ILMN_1692742	8	8q24.3	DENND3	DENN domain containing 3	22898	0.802556	0.00153889
110328	ILMN_1779279	14	14q22.3	MAPK1IP1L	mitogen-activated protein kinase 1 interacting protein 1 like	93487	0.803104	4.64614e-05
510180	ILMN_1789400	1	1p33	FOXD2	forkhead box D2	2306	0.804234	0.00101599
110437	ILMN_1694847	8	8q21.11	TERF1	telomeric repeat binding factor 1	7013	0.804329	0.0154142
3840678	ILMN_1743714	22	22q13.1	CARD10	caspase recruitment domain family member 10	29775	0.807615	6.44408e-05
6200528	ILMN_1689189	11	11q12.3	ZBTB3	zinc finger and BTB domain containing 3	79842	0.808107	0.000170369
4120411	ILMN_1703477	1	1q22	ARHGEF2	Rho/Rac guanine nucleotide exchange factor 2	9181	0.809061	4.45922e-06
7550743	ILMN_1682694	X	Xq28	VMA21	VMA21, vacuolar ATPase assembly factor	203547	0.809098	3.6699e-06
630603	ILMN_1806809	9	9q31.1	ZNF189	zinc finger protein 189	7743	0.809176	0.00584863
6590050	ILMN_2258749	17	17q25.3	BAIAP2	BAI1 associated protein 2	10458	0.81494	8.40756e-05
5260594	ILMN_3243156	14	14q32.33	AHNAK2	AHNAK nucleoprotein 2	113146	0.816715	0.000172101
4180086	ILMN_1664960	14	14q32.33	CEP170B	centrosomal protein 170B	283638	0.817017	0.000179463
4210750	ILMN_1740819	2	2q11.2	STARD7	StAR related lipid transfer domain containing 7	56910	0.817541	2.40245e-06
4050239	ILMN_1655608	3	3p21.31	KLHL18	kelch like family member 18	23276	0.817848	0.000617754
1070279	ILMN_1676728	6	6p21.1	DLK2	delta like non-canonical Notch ligand 2	65989	0.819073	2.30478e-05
510577	ILMN_1666893	4	4q35.2	TRIML2	tripartite motif family like 2	205860	0.819802	0.0059594
7510259	ILMN_1722056	13	13q14.3	ATP7B	ATPase copper transporting beta	540	0.819851	8.1237e-06
130735	ILMN_2156786	5	5q22.3	PGGT1B	protein geranylgeranyltransferase type I subunit beta	5229	0.819858	0.000106582
6900278	ILMN_1709032	3	3p21.31	FYCO1	FYVE and coiled-coil domain containing 1	79443	0.819878	1.90639e-08
1230632	ILMN_2353327	9	9p13.2	RNF38	ring finger protein 38	152006	0.819997	0.00272843
2100241	ILMN_1783846	2	2q33.2	RAPH1	Ras association (RalGDS/AF-6) and pleckstrin homology domains 1	65059	0.822382	3.78099e-05
5820500	ILMN_1790202	1	1q42.13	C1orf35	chromosome 1 open reading frame 35	79169	0.823048	1.36627e-06
4560576	ILMN_1738523	3	3p22.2	MYD88	MYD88, innate immune signal transduction adaptor	4615	0.82464	1.05764e-05
2600452	ILMN_1778032	9	9q34.2	SURF6	surfeit 6	6838	0.826404	1.36358e-05
1230176	ILMN_1735553	14	14q24.2	MAP3K9	mitogen-activated protein kinase kinase kinase 9	4293	0.827858	0.00168537
4860646	ILMN_1712684	7	7p22.3	FAM20C	FAM20C, golgi associated secretory pathway kinase	56975	0.832003	0.000463942
1990446	ILMN_1797191	1	1q25.1	KIAA0040	KIAA0040	9674	0.83375	3.79934e-05
4560689	ILMN_1810085	3	3q27.1	ABCF3	ATP binding cassette subfamily F member 3	55324	0.833898	0.00265503
2140463	ILMN_1687495	21	21q22.3	SLC37A1	solute carrier family 37 member 1	54020	0.83668	0.000198131
5390433	ILMN_2349831	14	14q32.13	DICER1	dicer 1, ribonuclease III	23405	0.837127	0.00211784
3840463	ILMN_2194649	1	1q24.1	TADA1	transcriptional adaptor 1	117143	0.837178	2.53834e-06
2510204	ILMN_1751431	12	12q13.2	PYM1	PYM homolog 1, exon junction complex associated factor	84305	0.841848	0.00124833
5130332	ILMN_1758337	16	16p13.3	ZNF213	zinc finger protein 213	7760	0.842955	1.06316e-05
7210128	ILMN_2405297	1	1p12	NOTCH2	notch 2	4853	0.846771	0.000202188
5690113	ILMN_2102693	17	17q11.2	NUFIP2	nuclear FMR1 interacting protein 2	57532	0.847391	3.02551e-05
3360112	ILMN_1784661	9	9q21.13	CEMIP2	cell migration inducing hyaluronidase 2	23670	0.848632	0.000596679
1660722	ILMN_1685547	X	Xp11.21	ZXDB	zinc finger X-linked duplicated B	158586	0.850173	5.38515e-05
3940255	ILMN_2120917	11	11p15.4	CTR9	CTR9 homolog, Paf1/RNA polymerase II complex component	9646	0.850872	0.00155241
6860612	ILMN_2106227	9	9p24.1	KIAA2026	KIAA2026	158358	0.851148	7.10573e-05
3420228	ILMN_1748831	14	14q32.33	PPP1R13B	protein phosphatase 1 regulatory subunit 13B	23368	0.853592	0.000430413
2260577	ILMN_1810037	9	9p13.3	RUSC2	RUN and SH3 domain containing 2	9853	0.853652	0.000131786
6400722	ILMN_3181420	22	22q12.3	HMGXB4	HMG-box containing 4	10042	0.853752	9.96405e-08
1990292	ILMN_2407811	17	17p13.1	NEURL4	neuralized E3 ubiquitin protein ligase 4	84461	0.853846	0.00159794
3520168	ILMN_1881909	NA	NA	NA	NA		0.85955	0.0437881
430639	ILMN_1798602	11	11q14.1	PCF11	PCF11, cleavage and polyadenylation factor subunit	51585	0.859631	0.000147234
2060079	ILMN_2346831	14	14q21.3	MGAT2	mannosyl (alpha-1,6-)-glycoprotein beta-1,2-N-acetylglucosaminyltransferase	4247	0.860259	1.95659e-05
6060379	ILMN_1761086	2	2p15-p14	VPS54	VPS54, GARP complex subunit	51542	0.861578	1.90006e-05
1570092	ILMN_1699489	18	18p11.21	TUBB6	tubulin beta 6 class V	84617	0.863254	1.93301e-05
2970020	ILMN_1715864	X	Xp22.2-p22.13	NHS	NHS actin remodeling regulator	4810	0.863587	9.65223e-05
2140026	ILMN_2075847	12	12q13.2	ZC3H10	zinc finger CCCH-type containing 10	84872	0.863872	6.35716e-05
1990092	ILMN_3256325	1	1p13.3	CYB561D1	cytochrome b561 family member D1	284613	0.864859	8.72025e-05
540221	ILMN_1723158	12	12p13.31	NOP2	NOP2 nucleolar protein	4839	0.866254	8.61522e-06
5670095	ILMN_1748427	10	10q11.21	ZNF239	zinc finger protein 239	8187	0.866705	1.3196e-05
5860064	ILMN_1670322	5	5q13.2	FCHO2	FCH domain only 2	115548	0.868772	3.43538e-05
4560482	ILMN_1702044	17	17p13.1	CNTROB	centrobin, centriole duplication and spindle assembly protein	116840	0.871489	0.00530815
7400100	ILMN_2383455	12	12q13.2	SUOX	sulfite oxidase	6821	0.872453	9.7669e-05
830424	ILMN_2152581	6	6p21.31	STK38	serine/threonine kinase 38	11329	0.872656	5.0841e-06
6770209	ILMN_1652512	21	21q22.3	C2CD2	C2 calcium dependent domain containing 2	25966	0.872962	3.76623e-06
7000390	ILMN_1751474	1	1p22.1	ARHGAP29	Rho GTPase activating protein 29	9411	0.873795	0.000735133
650008	ILMN_1659156	10	10p15.1	ANKRD16	ankyrin repeat domain 16	54522	0.874355	8.78698e-05
1820768	ILMN_1853876	8	8q21.3	TMEM64	transmembrane protein 64	169200	0.875528	1.79529e-07
7560253	ILMN_1745271	8	8q24.3	EXOSC4	exosome component 4	54512	0.876346	0.000564053
6450685	ILMN_1791569	3	3q21.3	PLXNA1	plexin A1	5361	0.876628	0.000243734
6280053	ILMN_1741976	4	4q22.3	SMARCAD1	SWI/SNF-related, matrix-associated actin-dependent regulator of chromatin, subfamily a, containing DEAD/H box 1	56916	0.877465	3.39596e-05
2810328	ILMN_1797698	20	20q11.22	RBM12	RNA binding motif protein 12	10137	0.877626	5.24869e-05
4120370	ILMN_1723793	16	16p12.2	PALB2	partner and localizer of BRCA2	79728	0.878356	0.000317639
3170093	ILMN_2226917	14	14q24.1	SUSD6	sushi domain containing 6	9766	0.87997	5.20271e-07
6370044	ILMN_1763842	9	9q34.11	PTRH1	peptidyl-tRNA hydrolase 1 homolog	138428	0.88003	0.000858382
2070315	ILMN_1740923	20	20p13	SLC52A3	solute carrier family 52 member 3	113278	0.88064	7.8738e-05
6330204	ILMN_1714945	19	19q13.2	ITPKC	inositol-trisphosphate 3-kinase C	80271	0.88075	0.00254059
7210685	ILMN_1651767	22	22q13.1-q13.2	MRTFA	myocardin related transcription factor A	57591	0.881312	0.000590359
6100446	ILMN_1840316	NA	NA	NA	NA		0.881485	0.00194968
7320731	ILMN_1678087	6	6q26	MAP3K4	mitogen-activated protein kinase kinase kinase 4	4216	0.882128	6.33986e-07
380019	ILMN_1696537	4	4q24	DDIT4L	DNA damage inducible transcript 4 like	115265	0.882455	3.80572e-06
4590121	ILMN_2211122	19	19q13.43	TRAPPC2B	trafficking protein particle complex 2B	10597	0.88405	3.70485e-06
3190338	ILMN_1726466	9	9q32	HDHD3	haloacid dehalogenase like hydrolase domain containing 3	81932	0.885446	4.52901e-05
5490196	ILMN_2340347	11	11q13.2	PC	pyruvate carboxylase	5091	0.886023	0.00438297
5340017	ILMN_2148527	11	11p15.5	H19	H19, imprinted maternally expressed transcript	283120	0.886218	0.000845339
2120544	ILMN_1733696	15	15q24.2	IMP3	IMP3, U3 small nucleolar ribonucleoprotein	55272	0.887452	7.21539e-09
450608	ILMN_2385191	3	3p21.31	QRICH1	glutamine rich 1	54870	0.888261	8.16165e-05
1090414	ILMN_2073010	9	9q34.3	TMEM203	transmembrane protein 203	94107	0.888433	6.28223e-05
3710296	ILMN_1740005	17	17p13.3	SERPINF2	serpin family F member 2	5345	0.888904	5.72855e-06
3440608	ILMN_1785177	12	12q13.2	DNAJC14	DnaJ heat shock protein family (Hsp40) member C14	85406	0.891077	3.29437e-06
3400709	ILMN_1882590	9	9q34.3	NACC2	NACC family member 2	138151	0.891148	3.5755e-06
6650202	ILMN_1744299	6	c("6p12.3", "6")	ADGRF1	adhesion G protein-coupled receptor F1	266977	0.893629	4.17158e-06
1190739	ILMN_1751034	16	16p12.3	ITPRIPL2	ITPRIP like 2	162073	0.894123	0.0104356
1990575	ILMN_2054145	6	6p24.2	PAK1IP1	PAK1 interacting protein 1	55003	0.894186	0.000440389
1010630	ILMN_3226904	12	12p13.31	NOP2	NOP2 nucleolar protein	4839	0.894192	0.00118012
2100653	ILMN_1783606	7	7q22.3	KMT2E	lysine methyltransferase 2E	55904	0.894232	4.42945e-05
1990253	ILMN_1777096	12	12q23.3	TDG	thymine DNA glycosylase	6996	0.89434	2.972e-08
5700747	ILMN_1695604	6	6q22.1	DCBLD1	discoidin, CUB and LCCL domain containing 1	285761	0.894958	0.00171723
3140521	ILMN_3247636	15	15q22.31	SCARNA14	small Cajal body-specific RNA 14	692149	0.895826	0.0137505
1430681	ILMN_1784655	17	17q11.2	TLCD1	TLC domain containing 1	116238	0.896238	0.00227909
5360653	ILMN_1678579	1	1p32.3	CPT2	carnitine palmitoyltransferase 2	1376	0.898938	2.12161e-05
2060037	ILMN_1731113	9	9q33.3	ZBTB43	zinc finger and BTB domain containing 43	23099	0.901624	0.0115454
3850341	ILMN_1718268	1	1p34.3	GJB4	gap junction protein beta 4	127534	0.902085	0.00707714
3800017	ILMN_2346727	8	8p22	MTUS1	microtubule associated scaffold protein 1	57509	0.90261	0.000763095
4890133	ILMN_1765829	17	17q11.2	NUFIP2	nuclear FMR1 interacting protein 2	57532	0.903562	5.54033e-06
240154	ILMN_3235477	21	21q22.3	RRP1	ribosomal RNA processing 1	8568	0.904352	0.00542224
1050500	ILMN_1744268	8	8q24.3	PLEC	plectin	5339	0.904563	2.81438e-05
7050136	ILMN_1786976	20	20q13.32	RAB22A	RAB22A, member RAS oncogene family	57403	0.907716	2.22022e-07
7000176	ILMN_2063532	4	4p11	SLC10A4	solute carrier family 10 member 4	201780	0.908234	0.00318939
1580735	ILMN_2115154	7	7p15.3	NUPL2	nucleoporin like 2	11097	0.908261	1.29773e-06
2640246	ILMN_1711078	NA	NA	NA	NA		0.911195	0.0172498
4010138	ILMN_1658575	2	2q24.1	GALNT5	polypeptide N-acetylgalactosaminyltransferase 5	11227	0.911361	4.50229e-06
6220113	ILMN_1718152	11	11p13	DEPDC7	DEP domain containing 7	91614	0.911408	0.000604503
450553	ILMN_1714567	11	11q12.3	AHNAK	AHNAK nucleoprotein	79026	0.911988	4.33341e-06
7210113	ILMN_1670099	2	2q24.3	NOSTRIN	nitric oxide synthase trafficking	115677	0.913661	3.71453e-06
5310717	ILMN_1724753	14	14q22.1	NIN	ninein	51199	0.913688	7.37767e-07
620543	ILMN_2200917	3	3p24.1	SLC4A7	solute carrier family 4 member 7	9497	0.914718	6.7728e-05
6180064	ILMN_1678032	19	19q13.33	NR1H2	nuclear receptor subfamily 1 group H member 2	7376	0.918077	0.000379854
3290343	ILMN_2337058	X	Xp11.23	PORCN	porcupine O-acyltransferase	64840	0.919733	0.000256479
5820601	ILMN_1688480	11	11q13.3	CCND1	cyclin D1	595	0.920313	1.79747e-10
6960538	ILMN_2328433	12	12p13.31	NOP2	NOP2 nucleolar protein	4839	0.923895	0.000693564
4200386	ILMN_1743352	6	6p21.1	TBCC	tubulin folding cofactor C	6903	0.925285	0.00107277
4280253	ILMN_1726064	6	6p24.2	PAK1IP1	PAK1 interacting protein 1	55003	0.926941	9.65715e-07
3890189	ILMN_1746846	2	2q35	TTLL4	tubulin tyrosine ligase like 4	9654	0.928737	4.34351e-06
3390730	ILMN_1753627	9	9q34.11	DOLK	dolichol kinase	22845	0.930107	3.38272e-05
510093	ILMN_2387784	11	11p15.5	DEAF1	DEAF1 transcription factor	10522	0.930731	0.00232528
430333	ILMN_1723768	11	11q23.3	NLRX1	NLR family member X1	79671	0.930902	8.98917e-07
2600079	ILMN_1672565	3	3q12.3	TRMT10C	tRNA methyltransferase 10C, mitochondrial RNase P subunit	54931	0.934377	9.01543e-05
6250451	ILMN_1658010	X	Xq22.1	CENPI	centromere protein I	2491	0.934853	1.3743e-05
70239	ILMN_2064917	5	5q13.3	AGGF1	angiogenic factor with G-patch and FHA domains 1	55109	0.935058	3.29598e-06
20707	ILMN_2300396	8	8q24.3	COMMD5	COMM domain containing 5	28991	0.935787	2.03228e-05
1030768	ILMN_1809040	1	1p36.11	LDLRAP1	low density lipoprotein receptor adaptor protein 1	26119	0.937212	0.00011793
4760692	ILMN_1805474	1	1q42.2	C1orf131	chromosome 1 open reading frame 131	128061	0.938827	0.00104027
2190220	ILMN_1810228	1	1p13.1	TTF2	transcription termination factor 2	8458	0.939183	3.67903e-05
1990288	ILMN_1741628	1	1q25.2	ABL2	ABL proto-oncogene 2, non-receptor tyrosine kinase	27	0.94083	9.73604e-06
1660477	ILMN_1778242	14	14q32.11	CALM1	calmodulin 1	801	0.943314	1.49159e-06
2940632	ILMN_1731044	NA	NA	NA	NA		0.943838	1.70226e-05
2120452	ILMN_1795342	2	2q37.3	MLPH	melanophilin	79083	0.94385	8.35742e-08
3370471	ILMN_1776493	8	8p22	MTUS1	microtubule associated scaffold protein 1	57509	0.945124	3.2618e-05
1570754	ILMN_1808779	11	11p13	CSTF3	cleavage stimulation factor subunit 3	1479	0.945573	1.07612e-06
3060450	ILMN_1786893	3	3p21.31	RBM5	RNA binding motif protein 5	10181	0.947714	1.67844e-05
6060326	ILMN_1782110	21	21q22.3	ZBTB21	zinc finger and BTB domain containing 21	49854	0.951992	2.01704e-05
650348	ILMN_3306997	12	12q14.1	METTL1	methyltransferase like 1	4234	0.958333	0.000193038
4040450	ILMN_1682180	8	8q13.1	VCPIP1	valosin containing protein interacting protein 1	80124	0.958506	9.03356e-05
3800088	ILMN_2192072	11	11q22.2	MMP7	matrix metallopeptidase 7	4316	0.959665	4.1383e-07
520341	ILMN_1669259	11	11q21	ANKRD49	ankyrin repeat domain 49	54851	0.961547	8.19765e-05
1430280	ILMN_1715715	19	19q13.11	CEBPA	CCAAT enhancer binding protein alpha	1050	0.969046	0.000239842
2030041	ILMN_1757237	2	c("2p25.1", "2p24")	ASAP2	ArfGAP with SH3 domain, ankyrin repeat and PH domain 2	8853	0.969896	4.74216e-06
6960367	ILMN_2241124	6	c("6p12.3", "6")	ADGRF1	adhesion G protein-coupled receptor F1	266977	0.972455	1.05603e-06
1090280	ILMN_1730888	7	7q11.21	ZNF680	zinc finger protein 680	340252	0.976145	0.000952575
4760747	ILMN_1651950	7	7q11.21	TPST1	tyrosylprotein sulfotransferase 1	8460	0.97725	1.10257e-07
730458	ILMN_2127605	19	19q13.11	LRP3	LDL receptor related protein 3	4037	0.979967	1.31267e-05
6450300	ILMN_1770206	17	17p13.3	GEMIN4	gem nuclear organelle associated protein 4	50628	0.980243	2.52332e-06
6180253	ILMN_1652777	11	11q13.1	CDC42EP2	CDC42 effector protein 2	10435	0.980913	7.81286e-05
460458	ILMN_1728802	1	1q43-q44	SDCCAG8	serologically defined colon cancer antigen 8	10806	0.981133	2.6908e-05
2810026	ILMN_1778575	3	3p25.1	WNT7A	Wnt family member 7A	7476	0.984463	1.20843e-06
6350075	ILMN_1692072	16	16q24.3	CENPBD1	CENPB DNA-binding domain containing 1	92806	0.98722	1.31713e-05
830215	ILMN_1745513	22	22q13.2	MCAT	malonyl-CoA-acyl carrier protein transacylase	27349	0.990754	7.84779e-05
830201	ILMN_1801443	11	11q13.5	TSKU	tsukushi, small leucine rich proteoglycan	25987	0.991659	1.68705e-06
20347	ILMN_1793831	16	16q22.1	TRADD	TNFRSF1A associated via death domain	8717	0.991704	0.000408159
5290307	ILMN_2168992	6	6q24.3	FBXO30	F-box protein 30	84085	0.993168	2.10268e-05
5220397	ILMN_1738368	6	6p24.3	RREB1	ras responsive element binding protein 1	6239	0.993528	0.000377367
5670367	ILMN_3251550	12	12q21.2	PHLDA1	pleckstrin homology like domain family A member 1	22822	0.995418	5.1458e-06
5340142	ILMN_1813766	9	9p24.1	RCL1	RNA terminal phosphate cyclase like 1	10171	0.996994	1.00263e-06
6620528	ILMN_1775170	16	16q13	MT1X	metallothionein 1X	4501	0.997321	0.00011318
5090010	ILMN_1692100	3	3p21.31	ZNF35	zinc finger protein 35	7584	1.00132	5.71414e-06
6220386	ILMN_2277419	17	17q25.3	SLC38A10	solute carrier family 38 member 10	124565	1.00932	1.56554e-05
5810600	ILMN_1726547	6	6q23.3	MAP3K5	mitogen-activated protein kinase kinase kinase 5	4217	1.01012	6.62707e-07
3800168	ILMN_1775708	12	12p13.31	SLC2A3	solute carrier family 2 member 3	6515	1.01126	4.12058e-06
3830327	ILMN_1657708	3	3q21.3	MGLL	monoglyceride lipase	11343	1.01471	7.39889e-05
380504	ILMN_1668760	16	16q22.1	HAS3	hyaluronan synthase 3	3038	1.01826	9.38427e-05
2900255	ILMN_1661484	19	19q13.43	ZBTB45	zinc finger and BTB domain containing 45	84878	1.01844	1.15409e-05
4760113	ILMN_1783712	16	16p12.3	KNOP1	lysine rich nucleolar protein 1	400506	1.01888	1.30599e-05
4200593	ILMN_2215119	6	6q25.3	SYNJ2	synaptojanin 2	8871	1.01957	6.34469e-06
5860204	ILMN_1787345	12	12q13.12	FKBP11	FK506 binding protein 11	51303	1.02073	0.0107126
1450634	ILMN_1807169	1	1p35.2	TINAGL1	tubulointerstitial nephritis antigen like 1	64129	1.02195	0.00303909
7570477	ILMN_1726289	12	12p11.21	KIAA1551	KIAA1551	55196	1.02619	8.68202e-07
5340646	ILMN_3194508	2	c("2p25.1", "2p24")	ASAP2	ArfGAP with SH3 domain, ankyrin repeat and PH domain 2	8853	1.02793	5.71638e-06
4280048	ILMN_2308903	20	20q13.12	WFDC3	WAP four-disulfide core domain 3	140686	1.0281	4.37789e-05
5700088	ILMN_1751656	2	2p25.1	KLF11	Kruppel like factor 11	8462	1.03293	3.35347e-06
240487	ILMN_1665384	1	1q44	SH3BP5L	SH3 binding domain protein 5 like	80851	1.03431	0.000996637
5810273	ILMN_1685854	5	5q31.3	IGIP	IgA inducing protein	492311	1.03736	0.000701732
1230673	ILMN_1798459	NA	NA	NA	NA		1.04012	0.00111723
1770603	ILMN_1768469	11	11q12.1	TCN1	transcobalamin 1	6947	1.04025	0.000185916
1410538	ILMN_2119774	11	11p15.2	CYP2R1	cytochrome P450 family 2 subfamily R member 1	120227	1.04991	2.50211e-05
520600	ILMN_2199022	17	17q25.1	SAP30BP	SAP30 binding protein	29115	1.05086	4.87835e-05
6270437	ILMN_1746465	11	11p13	FJX1	four-jointed box kinase 1	24147	1.05337	1.36745e-05
6620386	ILMN_1669557	1	1p36.11	CRYBG2	crystallin beta-gamma domain containing 2	55057	1.05349	1.39091e-05
3460451	ILMN_1743103	10	10q24.33	SH3PXD2A	SH3 and PX domains 2A	9644	1.05388	3.2944e-06
7560471	ILMN_1798288	1	1p33	MOB3C	MOB kinase activator 3C	148932	1.05423	1.77078e-08
4760647	ILMN_1699451	X	Xq28	CCNQ	cyclin Q	92002	1.05929	1.13143e-05
1010152	ILMN_1668469	4	4q31.3	TMEM131L	transmembrane 131 like	23240	1.0599	4.50771e-07
7320075	ILMN_3235803	9	9q21.11	AQP7P3	aquaporin 7 pseudogene 3	441432	1.0621	7.30313e-06
7510408	ILMN_1718629	21	21q11.2-q21.1	NRIP1	nuclear receptor interacting protein 1	8204	1.06253	2.22243e-06
7040132	ILMN_1661833	18	18p11.22	ANKRD12	ankyrin repeat domain 12	23253	1.06525	3.20241e-06
1990358	ILMN_1815190	12	12q14.1	METTL1	methyltransferase like 1	4234	1.07298	1.472e-05
2030735	ILMN_1708223	15	15q15.1	PAK6	p21 (RAC1) activated kinase 6	56924	1.07407	0.000533012
5700068	ILMN_2352380	21	21q22.3	TRPM2	transient receptor potential cation channel subfamily M member 2	7226	1.07508	7.31667e-05
430368	ILMN_1811195	19	19q13.43	ZNF211	zinc finger protein 211	10520	1.07675	6.62245e-06
7160100	ILMN_1796210	10	10q24.32	PPRC1	peroxisome proliferator-activated receptor gamma, coactivator-related 1	23082	1.07703	3.53531e-07
2680202	ILMN_1667432	3	3p21.31	HYAL3	hyaluronidase 3	8372	1.07743	2.20423e-05
10079	ILMN_2129572	1	1p21.3	F3	coagulation factor III, tissue factor	2152	1.07913	1.88483e-06
840528	ILMN_1712708	17	17q25.1	TRIM47	tripartite motif containing 47	91107	1.08123	1.03596e-06
5910338	ILMN_2073012	9	9q34.3	TMEM203	transmembrane protein 203	94107	1.08695	2.23861e-08
6980612	ILMN_1794501	16	16q22.1	HAS3	hyaluronan synthase 3	3038	1.08712	4.06699e-08
2450634	ILMN_1786024	22	22q13.2	POLR3H	RNA polymerase III subunit H	171568	1.08812	0.00236672
5080647	ILMN_1743397	17	17q12	PIGW	phosphatidylinositol glycan anchor biosynthesis class W	284098	1.08847	3.79993e-06
1940524	ILMN_1653856	11	11q24.1	UBASH3B	ubiquitin associated and SH3 domain containing B	84959	1.08924	2.82129e-07
6370037	ILMN_2145781	Y	Yq11.223	RBMY2FP	RNA binding motif protein, Y-linked, family 2, member F pseudogene	159162	1.0895	7.6437e-06
2120017	ILMN_2062370	9	9q22.31	NOL8	nucleolar protein 8	55035	1.09166	3.78975e-05
1190142	ILMN_1697268	18	18p11.32-p11.31	EMILIN2	elastin microfibril interfacer 2	84034	1.09538	1.57425e-07
5670075	ILMN_1722276	17	17p13.3	PAFAH1B1	platelet activating factor acetylhydrolase 1b regulatory subunit 1	5048	1.09632	2.53713e-06
7510537	ILMN_1701621	22	22q13.33	SCO2	SCO2, cytochrome c oxidase assembly protein	9997	1.09678	1.74236e-05
150392	ILMN_1849941	NA	NA	NA	NA		1.0968	1.08215e-06
1780379	ILMN_1805673	7	7q22.1	ALKBH4	alkB homolog 4, lysine demethylase	54784	1.09786	1.2547e-05
1240746	ILMN_1740415	20	20q13.12	WFDC3	WAP four-disulfide core domain 3	140686	1.09804	8.19304e-06
1300392	ILMN_1751328	8	8q24.3	FAM83H	family with sequence similarity 83 member H	286077	1.10047	1.4775e-05
5310050	ILMN_1768433	3	3p21.31	CCDC71	coiled-coil domain containing 71	64925	1.10907	0.000314934
360292	ILMN_3235325	NA	NA	NA	NA		1.10991	0.000127251
1070400	ILMN_1739813	3	3p21.31	HYAL1	hyaluronidase 1	3373	1.11027	1.42886e-08
6290546	ILMN_1750079	7	7p13	PURB	purine rich element binding protein B	5814	1.11095	1.89841e-05
6290707	ILMN_1793888	18	18q21.33	SERPINB5	serpin family B member 5	5268	1.1162	2.68237e-07
5700753	ILMN_1716815	19	19q13.2	CEACAM1	carcinoembryonic antigen related cell adhesion molecule 1	634	1.11834	7.66784e-05
2470161	ILMN_1708041	19	19q12	PLEKHF1	pleckstrin homology and FYVE domain containing 1	79156	1.12202	5.30892e-05
7560136	ILMN_1662065	2	2p14	WDR92	WD repeat domain 92	116143	1.12423	8.00219e-08
1010446	ILMN_1729288	22	22q12.3	C1QTNF6	C1q and TNF related 6	114904	1.13323	1.11242e-06
2750706	ILMN_1778831	20	20q13.33	NTSR1	neurotensin receptor 1	4923	1.1369	2.96625e-06
2060541	ILMN_3244323	1	1p36.33	MRPL20-AS1	MRPL20 antisense RNA 1	148413	1.1391	8.26388e-06
3780100	ILMN_1781966	22	22q12.2	OSBP2	oxysterol binding protein 2	23762	1.14063	7.88777e-07
360270	ILMN_1714600	12	12q21.2	NAV3	neuron navigator 3	89795	1.14267	9.69909e-07
990523	ILMN_3307782	7	7p22.1	FBXL18	F-box and leucine rich repeat protein 18	80028	1.14712	4.25869e-06
6580168	ILMN_1660544	15	15q26.2	ARRDC4	arrestin domain containing 4	91947	1.14784	4.17907e-07
7100300	ILMN_1809951	16	16p13.3	ZNF200	zinc finger protein 200	7752	1.14797	2.60964e-07
540541	ILMN_1673637	4	4p11	SLC10A4	solute carrier family 10 member 4	201780	1.14826	5.07195e-07
2490291	ILMN_1658373	12	12q13.3	PAN2	poly(A) specific ribonuclease subunit PAN2	9924	1.15006	0.00401426
620619	ILMN_1735495	2	2q11.2	TBC1D8	TBC1 domain family member 8	11138	1.15178	4.47e-06
3180315	ILMN_1711361	16	16q21	ZNF319	zinc finger protein 319	57567	1.1583	3.12375e-07
1770446	ILMN_3251171	X	Xq28	DNASE1L1	deoxyribonuclease 1 like 1	1774	1.15908	0.000185446
3520041	ILMN_2236800	21	21q22.11	SON	SON DNA binding protein	6651	1.16122	4.32367e-05
5720424	ILMN_1699574	10	10p11.22	NRP1	neuropilin 1	8829	1.16255	8.82653e-08
7400246	ILMN_1796113	12	12q13.12	BCDIN3D	BCDIN3 domain containing RNA methyltransferase	144233	1.18657	9.68989e-07
2190538	ILMN_1701243	10	10q24.31	TWNK	twinkle mtDNA helicase	56652	1.18868	1.94593e-07
5050575	ILMN_1654385	10	10p15.1	ASB13	ankyrin repeat and SOCS box containing 13	79754	1.19654	3.15896e-07
5130521	ILMN_1810392	11	11q13.1	ZNHIT2	zinc finger HIT-type containing 2	741	1.20194	6.75742e-06
4150408	ILMN_2372915	11	11q13.4	P2RY2	purinergic receptor P2Y2	5029	1.20728	3.14684e-07
2030397	ILMN_1671058	13	13q12.2	CDX2	caudal type homeobox 2	1045	1.21142	1.8432e-08
520639	ILMN_1705774	8	8q24.3	TIGD5	tigger transposable element derived 5	84948	1.21376	1.19911e-06
6660630	ILMN_1714108	8	8q22.1	TP53INP1	tumor protein p53 inducible nuclear protein 1	94241	1.21678	1.19333e-05
7210438	ILMN_1653896	3	3p21.31	ATRIP	ATR interacting protein	84126	1.22811	7.44276e-08
3440025	ILMN_1730504	6	6q26	AGPAT4	1-acylglycerol-3-phosphate O-acyltransferase 4	56895	1.23608	8.04094e-05
2490408	ILMN_1769757	14	14q21.3	DNAAF2	dynein axonemal assembly factor 2	55172	1.24744	0.000204185
6100433	ILMN_1812968	20	20q13.33	SOX18	SRY-box 18	54345	1.25807	2.22056e-06
1980300	ILMN_2314417	3	3p21.31	HYAL1	hyaluronidase 1	3373	1.26382	1.8218e-07
4810288	ILMN_1796968	11	11q12.3	INTS5	integrator complex subunit 5	80789	1.27375	2.42243e-06
7100136	ILMN_2094266	1	1p36.31	HES2	hes family bHLH transcription factor 2	54626	1.27673	1.13206e-05
6480592	ILMN_2406035	18	18q11.2	LAMA3	laminin subunit alpha 3	3909	1.27817	9.78266e-08
3870504	ILMN_1715181	19	19p13.11	ARRDC2	arrestin domain containing 2	27106	1.28406	4.08206e-07
1300037	ILMN_1741736	16	16q22.1	DDX28	DEAD-box helicase 28	55794	1.28942	2.71905e-06
1850546	ILMN_1745112	9	9q34.11	FAM102A	family with sequence similarity 102 member A	399665	1.29915	4.22879e-05
5910609	ILMN_1652185	16	16p12.1	IL4R	interleukin 4 receptor	3566	1.30392	6.52068e-08
6220288	ILMN_1655077	6	6q21	PRDM1	PR/SET domain 1	639	1.31841	5.03692e-05
4180554	ILMN_3265237	NA	NA	NA	NA		1.34191	0.0143123
1230196	ILMN_1809139	1	1q44	AHCTF1	AT-hook containing transcription factor 1	25909	1.34579	6.63611e-07
5560086	ILMN_2119535	6	6p25.2	RIPK1	receptor interacting serine/threonine kinase 1	8737	1.34929	6.72787e-07
4730543	ILMN_1761996	14	14q24.1	SRSF5	serine and arginine rich splicing factor 5	6430	1.35538	3.55546e-06
3780386	ILMN_1730516	NA	NA	NA	NA		1.361	6.37092e-07
3400332	ILMN_1802205	2	2p24.1	RHOB	ras homolog family member B	388	1.36419	1.54927e-07
5560408	ILMN_1728009	5	5q13.2	TMEM171	transmembrane protein 171	134285	1.38075	1.41922e-07
3800487	ILMN_1745148	20	20q13.13	ZNFX1	zinc finger NFX1-type containing 1	57169	1.38672	4.38308e-09
3450463	ILMN_2184064	15	15q26.2	ARRDC4	arrestin domain containing 4	91947	1.40808	1.84831e-08
3990224	ILMN_1765109	1	1p36.31	TNFRSF25	TNF receptor superfamily member 25	8718	1.40966	0.00118246
2750674	ILMN_3270972	2	c("2p25.1", "2p24")	ASAP2	ArfGAP with SH3 domain, ankyrin repeat and PH domain 2	8853	1.42686	2.32685e-07
1710397	ILMN_1747078	11	11q24.2	HYLS1	HYLS1, centriolar and ciliogenesis associated	219844	1.4281	2.89965e-07
4120437	ILMN_1767658	8	8q13.1	RRS1	ribosome biogenesis regulator homolog	23212	1.43404	7.14159e-06
990672	ILMN_1721575	15	15q15.1	VPS18	VPS18, CORVET/HOPS core subunit	57617	1.45148	8.28024e-06
1260020	ILMN_2358919	2	2p23.3	TP53I3	tumor protein p53 inducible protein 3	9540	1.45376	4.07758e-07
2690292	ILMN_1770035	20	20q13.12	NCOA5	nuclear receptor coactivator 5	57727	1.46805	4.4786e-07
6380445	ILMN_2378868	14	14q24.1	SRSF5	serine and arginine rich splicing factor 5	6430	1.49275	7.9378e-08
5420538	ILMN_2214197	8	8q22.1	TP53INP1	tumor protein p53 inducible nuclear protein 1	94241	1.53473	1.75093e-07
3850692	ILMN_1735930	19	19p13.11	KLF2	Kruppel like factor 2	10365	1.55453	1.40196e-08
1300470	ILMN_1679391	9	9q21.12	MAMDC2	MAM domain containing 2	256691	1.56415	2.63151e-11
6510156	ILMN_3238435	10	10q24.31	SNORA12	small nucleolar RNA, H/ACA box 12	677800	1.57848	1.31682e-05
5050500	ILMN_1688853	6	6p21.32	ZBTB9	zinc finger and BTB domain containing 9	221504	1.61673	5.47268e-10
3930278	ILMN_1756402	2	2q14.2	TMEM177	transmembrane protein 177	80775	1.68111	4.07958e-07
730491	ILMN_1706483	1	1q32.1	C1orf116	chromosome 1 open reading frame 116	79098	1.71328	5.27837e-09
520682	ILMN_1784294	7	7q32.2	CPA4	carboxypeptidase A4	51200	1.73921	2.17115e-08
3940088	ILMN_1651365	3	3q13.13	ZBED2	zinc finger BED-type containing 2	79413	1.74945	1.80052e-06
7150176	ILMN_1737298	2	2p11.2	MAT2A	methionine adenosyltransferase 2A	4144	1.80322	4.96348e-07
5820333	ILMN_1730077	15	15q15.1	RPUSD2	RNA pseudouridine synthase domain containing 2	27079	1.95151	1.79709e-10
6280440	ILMN_1770505	22	22q13.2	BIK	BCL2 interacting killer	638	2.22935	3.57213e-10
2940301	ILMN_1718537	10	10q24.32	HPS6	HPS6, biogenesis of lysosomal organelles complex 2 subunit 3	79803	2.95517	1.96299e-10
Differentially expressed genes are reported in the siTRAP1 0.5% O2 vs. siNEG 0.5% O2 experimental condition. The lists of genes are sorted for logFC values (abs logFC ≥0.60, P-value <0.05).

## Sheet: siNEG 0.5%O2 vs. siNEG 20%O2
Table SII. Continued.
row.names	Ill_ID	Chr	Band	Symbol	Name	EntrezID	logFC	P-value
2940301	ILMN_1718537	10	10q24.32	HPS6	HPS6, biogenesis of lysosomal organelles complex 2 subunit 3	79803	-4.54415	7.65759e-14
7150176	ILMN_1737298	2	2p11.2	MAT2A	methionine adenosyltransferase 2A	4144	-3.7346	2.54757e-12
5820333	ILMN_1730077	15	15q15.1	RPUSD2	RNA pseudouridine synthase domain containing 2	27079	-3.59799	2.4106e-15
3930278	ILMN_1756402	2	2q14.2	TMEM177	transmembrane protein 177	80775	-3.34346	4.13503e-12
5310050	ILMN_1768433	3	3p21.31	CCDC71	coiled-coil domain containing 71	64925	-3.33408	3.60124e-11
520639	ILMN_1705774	8	8q24.3	TIGD5	tigger transposable element derived 5	84948	-3.24987	7.34981e-14
2450634	ILMN_1786024	22	22q13.2	POLR3H	RNA polymerase III subunit H	171568	-3.1722	2.75934e-09
4730543	ILMN_1761996	14	14q24.1	SRSF5	serine and arginine rich splicing factor 5	6430	-3.12075	4.76983e-12
6380445	ILMN_2378868	14	14q24.1	SRSF5	serine and arginine rich splicing factor 5	6430	-3.09436	2.71e-13
7400246	ILMN_1796113	12	12q13.12	BCDIN3D	BCDIN3 domain containing RNA methyltransferase	144233	-3.03679	1.27571e-13
4120437	ILMN_1767658	8	8q13.1	RRS1	ribosome biogenesis regulator homolog	23212	-2.97362	7.66531e-11
4760692	ILMN_1805474	1	1q42.2	C1orf131	chromosome 1 open reading frame 131	128061	-2.92052	1.78411e-10
4760113	ILMN_1783712	16	16p12.3	KNOP1	lysine rich nucleolar protein 1	400506	-2.8124	1.1062e-12
5050500	ILMN_1688853	6	6p21.32	ZBTB9	zinc finger and BTB domain containing 9	221504	-2.69476	5.25238e-14
2060541	ILMN_3244323	1	1p36.33	MRPL20-AS1	MRPL20 antisense RNA 1	148413	-2.69331	9.31186e-12
3520168	ILMN_1881909	NA	NA	NA	NA		-2.57977	2.6848e-06
3390730	ILMN_1753627	9	9q34.11	DOLK	dolichol kinase	22845	-2.57896	4.12486e-12
1230196	ILMN_1809139	1	1q44	AHCTF1	AT-hook containing transcription factor 1	25909	-2.57862	1.45922e-11
6480379	ILMN_3250592	16	16p13.3	EEF2KMT	eukaryotic elongation factor 2 lysine methyltransferase	196483	-2.54323	1.85103e-08
2810328	ILMN_1797698	20	20q11.22	RBM12	RNA binding motif protein 12	10137	-2.54201	3.69e-12
1190142	ILMN_1697268	18	18p11.32-p11.31	EMILIN2	elastin microfibril interfacer 2	84034	-2.52881	8.61961e-14
1850156	ILMN_1725338	8	8p23.1	CLDN23	claudin 23	137075	-2.52835	1.09784e-14
670446	ILMN_1753482	11	11q13.4	FAM86C1	family with sequence similarity 86 member C1	55199	-2.51164	6.75358e-12
3460551	ILMN_1690464	10	10q23.33	SLC35G1	solute carrier family 35 member G1	159371	-2.51138	2.77064e-11
2900255	ILMN_1661484	19	19q13.43	ZBTB45	zinc finger and BTB domain containing 45	84878	-2.45764	1.03097e-11
2690292	ILMN_1770035	20	20q13.12	NCOA5	nuclear receptor coactivator 5	57727	-2.45241	9.99651e-11
1300037	ILMN_1741736	16	16q22.1	DDX28	DEAD-box helicase 28	55794	-2.42438	1.18674e-10
5050575	ILMN_1654385	10	10p15.1	ASB13	ankyrin repeat and SOCS box containing 13	79754	-2.39571	2.68286e-12
1990358	ILMN_1815190	12	12q14.1	METTL1	methyltransferase like 1	4234	-2.39526	5.69949e-11
3840026	ILMN_2178855	10	10q25.2	GPAM	glycerol-3-phosphate acyltransferase, mitochondrial	57678	-2.39197	8.64815e-10
650348	ILMN_3306997	12	12q14.1	METTL1	methyltransferase like 1	4234	-2.38855	4.02441e-10
6590661	ILMN_1697218	9	9q34.2	MED22	mediator complex subunit 22	6837	-2.376	6.61839e-09
6100433	ILMN_1812968	20	20q13.33	SOX18	SRY-box 18	54345	-2.36881	8.95308e-11
7560136	ILMN_1662065	2	2p14	WDR92	WD repeat domain 92	116143	-2.35809	2.20647e-13
2490408	ILMN_1769757	14	14q21.3	DNAAF2	dynein axonemal assembly factor 2	55172	-2.35294	4.17049e-08
7200707	ILMN_2234229	1	1p13.3	PRMT6	protein arginine methyltransferase 6	55170	-2.34924	1.70299e-10
630110	ILMN_1803745	12	12q13.2	SUOX	sulfite oxidase	6821	-2.34922	4.2032e-13
1070180	ILMN_3239168	11	11q13.2	FAM86C2P	family with sequence similarity 86, member A pseudogene	645332	-2.33437	4.1854e-09
7150259	ILMN_1740903	7	7q33	CYREN	cell cycle regulator of NHEJ	78996	-2.32956	2.48033e-11
7570324	ILMN_1732296	1	1p36.12	ID3	inhibitor of DNA binding 3, HLH protein	3399	-2.32955	3.14026e-10
3710450	ILMN_1814022	11	11p11.2	NR1H3	nuclear receptor subfamily 1 group H member 3	10062	-2.32891	5.05083e-10
5090309	ILMN_2143250	11	11p15.3	FAR1	fatty acyl-CoA reductase 1	84188	-2.2938	7.05123e-11
3450037	ILMN_3239946	3	3q22.1	FAM86HP	family with sequence similarity 86, member A pseudogene	729375	-2.29226	2.80035e-10
6290546	ILMN_1750079	7	7p13	PURB	purine rich element binding protein B	5814	-2.28202	3.40729e-10
6960243	ILMN_1771411	1	1p31.3	ALG6	ALG6, alpha-1,3-glucosyltransferase	29929	-2.27333	5.56762e-11
5560086	ILMN_2119535	6	6p25.2	RIPK1	receptor interacting serine/threonine kinase 1	8737	-2.26026	1.55028e-10
610056	ILMN_1664028	20	20p13	CENPB	centromere protein B	1059	-2.25419	1.63826e-10
1710397	ILMN_1747078	11	11q24.2	HYLS1	HYLS1, centriolar and ciliogenesis associated	219844	-2.22913	1.9318e-10
6620392	ILMN_1663080	7	7p22.3	LFNG	LFNG O-fucosylpeptide 3-beta-N-acetylglucosaminyltransferase	3955	-2.21639	6.54665e-09
7040372	ILMN_1758213	10	10q25.2	GPAM	glycerol-3-phosphate acyltransferase, mitochondrial	57678	-2.21434	2.09435e-10
3180315	ILMN_1711361	16	16q21	ZNF319	zinc finger protein 319	57567	-2.21225	6.1551e-12
1990575	ILMN_2054145	6	6p24.2	PAK1IP1	PAK1 interacting protein 1	55003	-2.2117	1.80533e-09
6450300	ILMN_1770206	17	17p13.3	GEMIN4	gem nuclear organelle associated protein 4	50628	-2.18677	5.33341e-12
5420538	ILMN_2214197	8	8q22.1	TP53INP1	tumor protein p53 inducible nuclear protein 1	94241	-2.18494	5.20675e-10
2750706	ILMN_1778831	20	20q13.33	NTSR1	neurotensin receptor 1	4923	-2.18134	9.34046e-11
5080647	ILMN_1743397	17	17q12	PIGW	phosphatidylinositol glycan anchor biosynthesis class W	284098	-2.17632	6.28289e-11
1430280	ILMN_1715715	19	19q13.11	CEBPA	CCAAT enhancer binding protein alpha	1050	-2.16581	3.53322e-09
4640161	ILMN_1707137	17	17p13.3	C17orf97	chromosome 17 open reading frame 97	400566	-2.15789	9.25351e-12
3940414	ILMN_1696407	17	17q25.1	SRSF2	serine and arginine rich splicing factor 2	6427	-2.15	1.01203e-11
1190739	ILMN_1751034	16	16p12.3	ITPRIPL2	ITPRIP like 2	162073	-2.14352	1.36675e-06
6350075	ILMN_1692072	16	16q24.3	CENPBD1	CENPB DNA-binding domain containing 1	92806	-2.13335	8.59626e-11
5670075	ILMN_1722276	17	17p13.3	PAFAH1B1	platelet activating factor acetylhydrolase 1b regulatory subunit 1	5048	-2.12966	6.16843e-11
2600079	ILMN_1672565	3	3q12.3	TRMT10C	tRNA methyltransferase 10C, mitochondrial RNase P subunit	54931	-2.10562	6.72833e-10
1990092	ILMN_3256325	1	1p13.3	CYB561D1	cytochrome b561 family member D1	284613	-2.10468	1.7252e-10
4810288	ILMN_1796968	11	11q12.3	INTS5	integrator complex subunit 5	80789	-2.10301	9.41131e-10
2190220	ILMN_1810228	1	1p13.1	TTF2	transcription termination factor 2	8458	-2.0994	2.04643e-10
5090010	ILMN_1692100	3	3p21.31	ZNF35	zinc finger protein 35	7584	-2.08976	5.08908e-11
5910338	ILMN_2073012	9	9q34.3	TMEM203	transmembrane protein 203	94107	-2.08493	2.5339e-13
7100082	ILMN_2413259	14	14q22.3	SOCS4	suppressor of cytokine signaling 4	122809	-2.08433	4.10328e-08
6650750	ILMN_1726893	17	17q21.33	EPN3	epsin 3	55040	-2.08005	3.13653e-09
580026	ILMN_1780298	16	16p13.3	EEF2KMT	eukaryotic elongation factor 2 lysine methyltransferase	196483	-2.07687	3.88452e-08
990523	ILMN_3307782	7	7p22.1	FBXL18	F-box and leucine rich repeat protein 18	80028	-2.07037	4.23871e-10
3850692	ILMN_1735930	19	19p13.11	KLF2	Kruppel like factor 2	10365	-2.06728	1.02693e-10
5700068	ILMN_2352380	21	21q22.3	TRPM2	transient receptor potential cation channel subfamily M member 2	7226	-2.06441	6.99471e-09
3940088	ILMN_1651365	3	3q13.13	ZBED2	zinc finger BED-type containing 2	79413	-2.0644	1.43254e-07
10440	ILMN_1679177	2	2q33.1	MARS2	methionyl-tRNA synthetase 2, mitochondrial	92935	-2.06093	1.00579e-11
5490524	ILMN_2307450	19	19q13.11	ZNF302	zinc finger protein 302	55900	-2.05954	5.03138e-08
4230035	ILMN_1732343	11	11q23.3	SIK3	SIK family kinase 3	23387	-2.04503	1.26794e-08
1440451	ILMN_1697736	9	9q34.12	EXOSC2	exosome component 2	23404	-2.04059	6.40694e-11
6660630	ILMN_1714108	8	8q22.1	TP53INP1	tumor protein p53 inducible nuclear protein 1	94241	-2.03989	5.43157e-09
4280253	ILMN_1726064	6	6p24.2	PAK1IP1	PAK1 interacting protein 1	55003	-2.0322	2.11083e-12
1820053	ILMN_1787127	17	17p13.3	SLC43A2	solute carrier family 43 member 2	124935	-2.02578	1.89886e-07
6270138	ILMN_1739001	1	1p32.1	TACSTD2	tumor associated calcium signal transducer 2	4070	-2.02536	7.81466e-07
6510156	ILMN_3238435	10	10q24.31	SNORA12	small nucleolar RNA, H/ACA box 12	677800	-2.02216	3.95728e-07
1090414	ILMN_2073010	9	9q34.3	TMEM203	transmembrane protein 203	94107	-2.02037	3.34969e-10
60609	ILMN_1705447	16	16q24.3	AFG3L1P	AFG3 like matrix AAA peptidase subunit 1, pseudogene	172	-2.02025	4.66827e-07
6510634	ILMN_1711543	14	14q24.3	RIOX1	ribosomal oxygenase 1	79697	-2.014	5.65302e-09
730458	ILMN_2127605	19	19q13.11	LRP3	LDL receptor related protein 3	4037	-2.01383	2.03781e-10
380014	ILMN_1666553	17	17q25.1	SLC25A19	solute carrier family 25 member 19	60386	-2.01266	1.80356e-11
1820441	ILMN_1736340	1	1q32.3	ANGEL2	angel homolog 2	90806	-2.00011	4.61736e-10
430026	ILMN_1795341	17	17q22	SRSF1	serine and arginine rich splicing factor 1	6426	-1.99505	2.53171e-08
3710154	ILMN_1781400	8	8p22	SLC7A2	solute carrier family 7 member 2	6542	-1.99339	9.29109e-08
6960056	ILMN_1673252	7	7p22.1	AIMP2	aminoacyl tRNA synthetase complex interacting multifunctional protein 2	7965	-1.99273	1.13426e-10
2470161	ILMN_1708041	19	19q12	PLEKHF1	pleckstrin homology and FYVE domain containing 1	79156	-1.98074	1.72062e-08
2230288	ILMN_1691572	22	22q12.3	TST	thiosulfate sulfurtransferase	7263	-1.9797	2.09759e-11
5310332	ILMN_1667577	15	15q15.3	LCMT2	leucine carboxyl methyltransferase 2	9836	-1.97482	3.53788e-11
2190538	ILMN_1701243	10	10q24.31	TWNK	twinkle mtDNA helicase	56652	-1.9724	4.20084e-11
1510138	ILMN_3242603	5	5q13.2	GTF2H2B	general transcription factor IIH subunit 2B (pseudogene)	653238	-1.97236	1.93569e-08
580014	ILMN_2169856	12	12q24.31	C12orf43	chromosome 12 open reading frame 43	64897	-1.97037	1.04399e-11
6420142	ILMN_1797031	3	3q21.1	HSPBAP1	HSPB1 associated protein 1	79663	-1.96126	1.28342e-10
1230673	ILMN_1798459	NA	NA	NA	NA		-1.95965	6.02478e-07
1230296	ILMN_1805658	6	6q24.2	LTV1	LTV1 ribosome biogenesis factor	84946	-1.95756	2.91107e-11
6660259	ILMN_1786050	20	20p11.23	RBBP9	RB binding protein 9, serine hydrolase	10741	-1.94691	3.3392e-09
5130521	ILMN_1810392	11	11q13.1	ZNHIT2	zinc finger HIT-type containing 2	741	-1.94576	4.66502e-09
7400100	ILMN_2383455	12	12q13.2	SUOX	sulfite oxidase	6821	-1.94164	9.37752e-10
3390373	ILMN_1706959	17	17p13.3	TIMM22	translocase of inner mitochondrial membrane 22	29928	-1.94112	9.69103e-10
7560253	ILMN_1745271	8	8q24.3	EXOSC4	exosome component 4	54512	-1.9401	1.66898e-08
940672	ILMN_1680104	11	11p11.2	SLC35C1	solute carrier family 35 member C1	55343	-1.93864	2.54754e-08
7510537	ILMN_1701621	22	22q13.33	SCO2	SCO2, cytochrome c oxidase assembly protein	9997	-1.9375	3.78514e-09
20707	ILMN_2300396	8	8q24.3	COMMD5	COMM domain containing 5	28991	-1.93569	3.32408e-10
4480504	ILMN_1729976	13	13q34	CHAMP1	chromosome alignment maintaining phosphoprotein 1	283489	-1.9311	2.93959e-09
1580433	ILMN_3249406	1	1q42.13	URB2	URB2 ribosome biogenesis homolog	9816	-1.92811	2.81445e-10
2000148	ILMN_1707695	10	10q23.31	IFIT1	interferon induced protein with tetratricopeptide repeats 1	3434	-1.9186	6.43894e-09
6280053	ILMN_1741976	4	4q22.3	SMARCAD1	SWI/SNF-related, matrix-associated actin-dependent regulator of chromatin, subfamily a, containing DEAD/H box 1	56916	-1.91471	2.7556e-10
1770195	ILMN_1735908	5	5q13.2	UTP15	UTP15, small subunit processome component	84135	-1.91123	3.75775e-07
7210487	ILMN_2159859	15	15q26.3	LYSMD4	LysM domain containing 4	145748	-1.90996	1.36993e-09
3130719	ILMN_2166686	13	13q14.12	NUFIP1	nuclear FMR1 interacting protein 1	26747	-1.9088	2.04481e-12
990020	ILMN_1797893	13	13q13.1	N4BP2L2	NEDD4 binding protein 2 like 2	10443	-1.90324	1.35248e-11
2490291	ILMN_1658373	12	12q13.3	PAN2	poly(A) specific ribonuclease subunit PAN2	9924	-1.90256	2.75876e-05
70161	ILMN_2052891	4	4q22.1	PKD2	polycystin 2, transient receptor potential cation channel	5311	-1.89967	6.86326e-09
20040	ILMN_2404512	1	1q42.13	PSEN2	presenilin 2	5664	-1.89516	7.17887e-08
7100300	ILMN_1809951	16	16p13.3	ZNF200	zinc finger protein 200	7752	-1.8927	6.62773e-11
770603	ILMN_1751276	11	11p14.1	BDNF	brain derived neurotrophic factor	627	-1.89149	3.17528e-08
4900044	ILMN_1741801	1	1p22.1	CDC7	cell division cycle 7	8317	-1.88997	4.98478e-09
3370377	ILMN_2072622	4	4q12	ERVMER34-1	endogenous retrovirus group MER34 member 1, envelope	100288413	-1.88795	1.49352e-10
2450411	ILMN_2269256	10	10q21.3	DNAJC12	DnaJ heat shock protein family (Hsp40) member C12	56521	-1.88541	3.1688e-09
1300392	ILMN_1751328	8	8q24.3	FAM83H	family with sequence similarity 83 member H	286077	-1.88146	5.20397e-09
1450064	ILMN_2346573	17	17q21.31	PSME3	proteasome activator subunit 3	10197	-1.87957	2.25736e-08
7000328	ILMN_3236239	3	3q21.1	LINC02035	long intergenic non-protein coding RNA 2035	100129550	-1.87785	2.17462e-08
6290598	ILMN_1664761	11	11q12.2	TMEM138	transmembrane protein 138	51524	-1.87369	1.20016e-10
4040605	ILMN_1714417	1	1q42.13	PSEN2	presenilin 2	5664	-1.86953	4.04351e-11
1820544	ILMN_2383305	1	1q22-q23.1	GPATCH4	G-patch domain containing 4	54865	-1.86951	8.82444e-09
3890187	ILMN_1813834	1	1p13.3	PRMT6	protein arginine methyltransferase 6	55170	-1.86595	2.51151e-09
2360392	ILMN_1790472	10	10q24.2	SLC25A28	solute carrier family 25 member 28	81894	-1.85843	8.18263e-13
5340142	ILMN_1813766	9	9p24.1	RCL1	RNA terminal phosphate cyclase like 1	10171	-1.85739	3.98211e-11
650008	ILMN_1659156	10	10p15.1	ANKRD16	ankyrin repeat domain 16	54522	-1.84802	1.89357e-09
2490204	ILMN_2155516	3	3q13.31	QTRT2	queuine tRNA-ribosyltransferase accessory subunit 2	79691	-1.84651	1.90367e-12
1940524	ILMN_1653856	11	11q24.1	UBASH3B	ubiquitin associated and SH3 domain containing B	84959	-1.8448	4.54654e-11
4880053	ILMN_1762549	11	11q13.3	LTO1	LTO1, ABCE1 maturation factor	220064	-1.84424	2.29276e-09
6400131	ILMN_1685663	20	20q13.2	CYP24A1	cytochrome P450 family 24 subfamily A member 1	1591	-1.83964	1.50193e-07
4480592	ILMN_1731609	17	17q25.3	CHMP6	charged multivesicular body protein 6	79643	-1.83919	5.09134e-08
540221	ILMN_1723158	12	12p13.31	NOP2	NOP2 nucleolar protein	4839	-1.83671	6.69806e-11
2070195	ILMN_1677484	9	9q34.3	SNAPC4	small nuclear RNA activating complex polypeptide 4	6621	-1.82936	1.15672e-08
450168	ILMN_1778836	2	2p22.1	SRSF7	serine and arginine rich splicing factor 7	6432	-1.82759	1.62575e-09
5870687	ILMN_1810891	16	16p11.2	ZNF629	zinc finger protein 629	23361	-1.82174	4.15177e-07
1170326	ILMN_1774336	14	14q21.3	POLE2	DNA polymerase epsilon 2, accessory subunit	5427	-1.81964	4.94276e-11
3140039	ILMN_1775943	14	14q13.2	BRMS1L	BRMS1 like transcriptional repressor	84312	-1.81843	1.1951e-06
7570477	ILMN_1726289	12	12p11.21	KIAA1551	KIAA1551	55196	-1.81411	8.32136e-11
4560671	ILMN_2234970	19	19p13.3	SLC39A3	solute carrier family 39 member 3	29985	-1.81407	1.58266e-10
3060450	ILMN_1786893	3	3p21.31	RBM5	RNA binding motif protein 5	10181	-1.80721	1.0126e-09
7560615	ILMN_1743241	7	7p21.3	ARL4A	ADP ribosylation factor like GTPase 4A	10124	-1.80706	7.41314e-07
5310309	ILMN_3243961	8	8q24.3	ZNF252P	zinc finger protein 252, pseudogene	286101	-1.80383	1.41534e-06
5360653	ILMN_1678579	1	1p32.3	CPT2	carnitine palmitoyltransferase 2	1376	-1.80032	6.10819e-10
6580603	ILMN_1780987	19	19p13.11	RFXANK	regulatory factor X associated ankyrin containing protein	8625	-1.79819	1.96518e-09
630403	ILMN_1654552	13	13q14.11	MRPS31	mitochondrial ribosomal protein S31	10240	-1.79692	1.41368e-10
6590278	ILMN_1770678	17	17q25.3	CBX2	chromobox 2	84733	-1.79529	1.03734e-09
5910541	ILMN_1807719	17	17p13.2	CTNS	cystinosin, lysosomal cystine transporter	1497	-1.794	4.41775e-09
3450093	ILMN_1680129	5	5p15.31	NSUN2	NOP2/Sun RNA methyltransferase family member 2	54888	-1.79372	7.07158e-10
50414	ILMN_1737818	12	12q24.31	C12orf43	chromosome 12 open reading frame 43	64897	-1.79286	1.71417e-09
7210438	ILMN_1653896	3	3p21.31	ATRIP	ATR interacting protein	84126	-1.78869	1.34438e-10
110437	ILMN_1694847	8	8q21.11	TERF1	telomeric repeat binding factor 1	7013	-1.78495	9.22511e-06
450300	ILMN_1794470	17	17p13.2	ANKFY1	ankyrin repeat and FYVE domain containing 1	51479	-1.78389	1.27764e-11
4260682	ILMN_2348975	1	1p34.1	NASP	nuclear autoantigenic sperm protein	4678	-1.78275	5.90938e-10
6420333	ILMN_3243302	NA	NA	NA	NA		-1.78088	6.90141e-08
2470427	ILMN_1800975	17	17q21.31	PSME3	proteasome activator subunit 3	10197	-1.77744	1.208e-07
60092	ILMN_1662658	12	12q24.33	PUS1	pseudouridine synthase 1	80324	-1.77687	1.51055e-11
620102	ILMN_2063168	2	2q13	MALL	mal, T cell differentiation protein like	7851	-1.77611	3.97406e-14
7000184	ILMN_1773643	5	5q11.2	SLC38A9	solute carrier family 38 member 9	153129	-1.77283	5.98161e-09
4120309	ILMN_1793508	7	7p14.1	YAE1	YAE1, ABCE1 maturation factor	57002	-1.76961	2.59181e-07
2480025	ILMN_2104830	11	c("11p11.2", "11p12-p11")	ACP2	acid phosphatase 2, lysosomal	53	-1.76729	9.24573e-07
1660477	ILMN_1778242	14	14q32.11	CALM1	calmodulin 1	801	-1.7661	5.98844e-11
1240477	ILMN_1758827	6	6q21	RTN4IP1	reticulon 4 interacting protein 1	84816	-1.7656	6.79075e-11
1510630	ILMN_1811650	16	16q22.1	DUS2	dihydrouridine synthase 2	54920	-1.76259	4.47813e-11
5560408	ILMN_1728009	5	5q13.2	TMEM171	transmembrane protein 171	134285	-1.76254	2.55827e-09
10278	ILMN_2202481	5	5q33.3	UBLCP1	ubiquitin like domain containing CTD phosphatase 1	134510	-1.75654	1.40991e-09
1740086	ILMN_1805725	12	12q13.3	B4GALNT1	beta-1,4-N-acetyl-galactosaminyltransferase 1	2583	-1.75214	3.39266e-12
160220	ILMN_2199284	12	12q24.11	ANAPC7	anaphase promoting complex subunit 7	51434	-1.75146	4.18727e-06
2810022	ILMN_1757415	1	1p32.3	COA7	cytochrome c oxidase assembly factor 7 (putative)	65260	-1.75097	8.15313e-08
2760068	ILMN_1836218	5	5p15.33	PP7080	uncharacterized LOC25845	25845	-1.74511	4.66718e-10
2320400	ILMN_1668012	7	7q21.3	SLC25A13	solute carrier family 25 member 13	10165	-1.74173	7.56488e-06
110075	ILMN_1781691	2	2q33.1	TRAK2	trafficking kinesin protein 2	66008	-1.74115	1.06841e-12
1780379	ILMN_1805673	7	7q22.1	ALKBH4	alkB homolog 4, lysine demethylase	54784	-1.73844	1.45374e-08
6550647	ILMN_1776993	1	1q42.2	COG2	component of oligomeric golgi complex 2	22796	-1.73755	1.29161e-10
520747	ILMN_1915076	NA	NA	NA	NA		-1.73333	1.86058e-09
6960538	ILMN_2328433	12	12p13.31	NOP2	NOP2 nucleolar protein	4839	-1.73009	3.05376e-07
6280440	ILMN_1770505	22	22q13.2	BIK	BCL2 interacting killer	638	-1.72905	2.01162e-08
4490273	ILMN_1727134	12	12p11.22	KLHL42	kelch like family member 42	57542	-1.72888	2.04765e-08
1010630	ILMN_3226904	12	12p13.31	NOP2	NOP2 nucleolar protein	4839	-1.72829	4.5574e-07
4810181	ILMN_3239445	14	14q32.33	ZBTB42	zinc finger and BTB domain containing 42	100128927	-1.72754	1.08292e-10
620255	ILMN_1743367	11	11q14.2	FZD4	frizzled class receptor 4	8322	-1.72729	8.75159e-08
70239	ILMN_2064917	5	5q13.3	AGGF1	angiogenic factor with G-patch and FHA domains 1	55109	-1.72568	2.08903e-10
150274	ILMN_1767542	15	15q23	THAP10	THAP domain containing 10	56906	-1.72495	2.2516e-09
4850538	ILMN_2363058	10	10q26.3	PAOX	polyamine oxidase	196743	-1.72268	1.32768e-07
20553	ILMN_1655485	1	1q42.2	SPRTN	SprT-like N-terminal domain	83932	-1.71888	4.1734e-10
5550537	ILMN_2215631	8	8q21.3	OTUD6B	OTU domain containing 6B	51633	-1.71604	8.30475e-10
5690113	ILMN_2102693	17	17q11.2	NUFIP2	nuclear FMR1 interacting protein 2	57532	-1.71019	8.7906e-10
4860180	ILMN_1741175	10	10q26.11	RAB11FIP2	RAB11 family interacting protein 2	22841	-1.70685	7.44623e-08
6180253	ILMN_1652777	11	11q13.1	CDC42EP2	CDC42 effector protein 2	10435	-1.70201	3.85202e-08
5420110	ILMN_1745813	10	10q22.1	KIF1BP	KIF1 binding protein	26128	-1.69718	1.21631e-08
4890500	ILMN_1805812	9	9q34.11	TOR1A	torsin family 1 member A	1861	-1.69449	8.88466e-10
4760630	ILMN_2072541	10	10q26.11	RAB11FIP2	RAB11 family interacting protein 2	22841	-1.69073	4.55687e-07
6620544	ILMN_1685112	17	17q23.3	TACO1	translational activator of cytochrome c oxidase I	51204	-1.69063	4.30515e-12
1070114	ILMN_1654324	1	1p34.2	HEYL	hes related family bHLH transcription factor with YRPW motif-like	26508	-1.68998	1.35762e-11
2070451	ILMN_1694589	6	6p12.2	PAQR8	progestin and adipoQ receptor family member 8	85315	-1.68996	2.46683e-08
1230470	ILMN_3242586	1	1q42.13	RHOU	ras homolog family member U	58480	-1.68926	3.65369e-07
5900605	ILMN_1734096	10	10q25.3	DCLRE1A	DNA cross-link repair 1A	9937	-1.68697	2.47259e-07
2140026	ILMN_2075847	12	12q13.2	ZC3H10	zinc finger CCCH-type containing 10	84872	-1.6865	4.36842e-09
3710088	ILMN_2366972	4	4q28.1	NUDT6	nudix hydrolase 6	11162	-1.68264	9.1743e-08
5130332	ILMN_1758337	16	16p13.3	ZNF213	zinc finger protein 213	7760	-1.68258	2.52224e-10
6220470	ILMN_1697117	6	6q27	TBP	TATA-box binding protein	6908	-1.68183	2.20671e-09
7650441	ILMN_1785404	4	4p15.32	FGFBP1	fibroblast growth factor binding protein 1	9982	-1.68181	2.50194e-06
6110592	ILMN_1737475	7	7q11.23	ABHD11	abhydrolase domain containing 11	83451	-1.68134	3.48845e-07
2510463	ILMN_1790575	1	1q24.3	EEF1AKNMT	eEF1A lysine and N-terminal methyltransferase	51603	-1.68102	1.13411e-09
6280626	ILMN_2251978	21	21q22.11	PAXBP1	PAX3 and PAX7 binding protein 1	94104	-1.67575	3.93263e-07
6760110	ILMN_1754045	2	2p16.1	FANCL	FA complementation group L	55120	-1.67491	2.09972e-07
1410403	ILMN_1696657	1	1q32.1	LRRN2	leucine rich repeat neuronal 2	10446	-1.67299	2.1622e-08
4780253	ILMN_1767459	12	12q23.3	POLR3B	RNA polymerase III subunit B	55703	-1.67297	1.45376e-09
4890133	ILMN_1765829	17	17q11.2	NUFIP2	nuclear FMR1 interacting protein 2	57532	-1.67076	3.93782e-10
4200414	ILMN_1795927	13	13q12.11	PSPC1	paraspeckle component 1	55269	-1.67075	3.59174e-10
5700735	ILMN_1731224	3	3q21.1	PARP9	poly(ADP-ribose) polymerase family member 9	83666	-1.67062	2.94786e-10
360292	ILMN_3235325	NA	NA	NA	NA		-1.6661	6.56754e-07
1450452	ILMN_2364131	20	20q13.12	TTPAL	alpha tocopherol transfer protein like	79183	-1.66539	1.27378e-08
3370255	ILMN_1811301	9	9q34.3	INPP5E	inositol polyphosphate-5-phosphatase E	56623	-1.66375	6.94632e-08
3450463	ILMN_2184064	15	15q26.2	ARRDC4	arrestin domain containing 4	91947	-1.66109	1.06422e-09
430333	ILMN_1723768	11	11q23.3	NLRX1	NLR family member X1	79671	-1.65596	7.79128e-11
10612	ILMN_1781906	10	10p15.1	RBM17	RNA binding motif protein 17	84991	-1.65408	1.90144e-09
7000176	ILMN_2063532	4	4p11	SLC10A4	solute carrier family 10 member 4	201780	-1.65303	5.63208e-06
4210750	ILMN_1740819	2	2q11.2	STARD7	StAR related lipid transfer domain containing 7	56910	-1.65256	2.8683e-11
4610520	ILMN_1712082	15	15q22.2	GCNT3	glucosaminyl (N-acetyl) transferase 3, mucin type	9245	-1.64896	3.14069e-06
3310376	ILMN_1765332	11	11q12.1	TIMM10	translocase of inner mitochondrial membrane 10	26519	-1.64813	1.05944e-07
1110114	ILMN_1803312	5	5q12.1	DIMT1	DIM1 dimethyladenosine transferase 1 homolog	27292	-1.64762	3.27987e-12
630603	ILMN_1806809	9	9q31.1	ZNF189	zinc finger protein 189	7743	-1.64577	3.88785e-06
1820347	ILMN_1683096	2	2q37.3	ASB1	ankyrin repeat and SOCS box containing 1	51665	-1.64564	1.45129e-09
2340671	ILMN_1689257	4	4p16.3	MAEA	macrophage erythroblast attacher	10296	-1.6344	1.17901e-05
1470706	ILMN_1777740	8	8q24.3	THEM6	thioesterase superfamily member 6	51337	-1.6302	8.17112e-08
1430681	ILMN_1784655	17	17q11.2	TLCD1	TLC domain containing 1	116238	-1.62982	3.21965e-06
6200017	ILMN_1670037	11	11p15.5	POLR2L	RNA polymerase II subunit L	5441	-1.62961	1.75452e-06
6270619	ILMN_1759008	16	16p11.2	ZNF689	zinc finger protein 689	115509	-1.62921	4.46465e-07
2120017	ILMN_2062370	9	9q22.31	NOL8	nucleolar protein 8	55035	-1.62912	1.48636e-07
4210762	ILMN_1722838	15	15q25.3	MRPL46	mitochondrial ribosomal protein L46	26589	-1.62008	2.80244e-10
240154	ILMN_3235477	21	21q22.3	RRP1	ribosomal RNA processing 1	8568	-1.61977	1.73949e-05
1580735	ILMN_2115154	7	7p15.3	NUPL2	nucleoporin like 2	11097	-1.61949	1.17469e-10
4010072	ILMN_1751051	7	7p14.1	C7orf25	chromosome 7 open reading frame 25	79020	-1.61281	8.17882e-09
2190240	ILMN_1786470	1	1q32.2	C1orf74	chromosome 1 open reading frame 74	148304	-1.6123	5.70101e-09
4120370	ILMN_1723793	16	16p12.2	PALB2	partner and localizer of BRCA2	79728	-1.61213	1.23171e-07
2370328	ILMN_1694174	11	11p15.4	TRIM68	tripartite motif containing 68	55128	-1.61055	1.37281e-08
2060079	ILMN_2346831	14	14q21.3	MGAT2	mannosyl (alpha-1,6-)-glycoprotein beta-1,2-N-acetylglucosaminyltransferase	4247	-1.61053	1.694e-09
4780187	ILMN_1856480	NA	NA	NA	NA		-1.60951	5.67406e-08
4210600	ILMN_1811692	17	17q23.3	FTSJ3	FtsJ RNA methyltransferase homolog 3	117246	-1.60843	6.67036e-08
50274	ILMN_1689774	4	4p16.1	MRFAP1L1	Morf4 family associated protein 1 like 1	114932	-1.60398	1.2563e-08
4900484	ILMN_1685661	1	1q41	RRP15	ribosomal RNA processing 15 homolog	51018	-1.60203	6.85545e-08
60500	ILMN_1797534	6	6p24.3	RIOK1	RIO kinase 1	83732	-1.6012	4.41823e-11
4150279	ILMN_1795286	6	6p21.33	C6orf47	chromosome 6 open reading frame 47	57827	-1.60107	6.81212e-09
3520041	ILMN_2236800	21	21q22.11	SON	SON DNA binding protein	6651	-1.60061	5.65763e-07
5270333	ILMN_2149766	17	17q23.2	APPBP2	amyloid beta precursor protein binding protein 2	10513	-1.60003	3.8111e-09
2850059	ILMN_2202637	12	12q23.3	CRY1	cryptochrome circadian regulator 1	1407	-1.59753	3.36398e-06
5720360	ILMN_2367782	2	2q11.2	STARD7	StAR related lipid transfer domain containing 7	56910	-1.59592	4.56209e-08
3130577	ILMN_1815039	6	6p21.1	RRP36	ribosomal RNA processing 36	88745	-1.59364	1.60557e-09
430639	ILMN_1798602	11	11q14.1	PCF11	PCF11, cleavage and polyadenylation factor subunit	51585	-1.59354	3.37483e-08
1570224	ILMN_1770044	15	15q25.1	CHRNA5	cholinergic receptor nicotinic alpha 5 subunit	1138	-1.59251	2.9849e-07
130519	ILMN_1690921	12	12q13.3	STAT2	signal transducer and activator of transcription 2	6773	-1.5922	1.22104e-08
7200731	ILMN_1658104	13	13q14.11	KBTBD6	kelch repeat and BTB domain containing 6	89890	-1.59043	7.25418e-09
4150475	ILMN_3243471	12	12q13.3	CNPY2	canopy FGF signaling regulator 2	10330	-1.58345	3.3773e-09
7050433	ILMN_1714335	8	8q21.11	RDH10	retinol dehydrogenase 10	157506	-1.58308	1.02198e-07
6450307	ILMN_2328972	20	20q11.21	DNMT3B	DNA methyltransferase 3 beta	1789	-1.58224	2.6201e-08
3800487	ILMN_1745148	20	20q13.13	ZNFX1	zinc finger NFX1-type containing 1	57169	-1.57963	4.25878e-10
2510204	ILMN_1751431	12	12q13.2	PYM1	PYM homolog 1, exon junction complex associated factor	84305	-1.57836	7.75158e-07
730020	ILMN_1797298	17	17q25.1	ARMC7	armadillo repeat containing 7	79637	-1.57654	2.47209e-09
2510689	ILMN_1722738	16	16p13.3	ROGDI	rogdi homolog	79641	-1.57585	7.56492e-07
2030397	ILMN_1671058	13	13q12.2	CDX2	caudal type homeobox 2	1045	-1.57229	2.09995e-10
7330131	ILMN_1747183	12	12q12	GXYLT1	glucoside xylosyltransferase 1	283464	-1.5695	5.22629e-09
2350722	ILMN_1697629	NA	NA	NA	NA		-1.56906	0.000502209
4290132	ILMN_2263144	11	11q12.3	TMEM223	transmembrane protein 223	79064	-1.56898	4.3511e-06
5870646	ILMN_2336109	22	22q13.2	L3MBTL2	L3MBTL2, polycomb repressive complex 1 subunit	83746	-1.56769	6.3518e-08
3420730	ILMN_1752197	11	11p15.5	GATD1	glutamine amidotransferase like class 1 domain containing 1	347862	-1.56585	3.49358e-05
990075	ILMN_1740900	14	14q22.2	BMP4	bone morphogenetic protein 4	652	-1.56544	2.05805e-07
5130414	ILMN_1683175	9	9p13.3	RPP25L	ribonuclease P/MRP subunit p25 like	138716	-1.5636	4.40841e-11
150605	ILMN_1725760	5	5q22.2	YTHDC2	YTH domain containing 2	64848	-1.5613	2.3991e-07
7560471	ILMN_1798288	1	1p33	MOB3C	MOB kinase activator 3C	148932	-1.55979	2.05735e-11
2120603	ILMN_2118229	7	7q22.1	NAPEPLD	N-acyl phosphatidylethanolamine phospholipase D	222236	-1.55941	2.17683e-08
6980092	ILMN_1746135	17	17p13.1	PHF23	PHD finger protein 23	79142	-1.5592	1.65664e-08
1500246	ILMN_1800935	1	1q42.2	ARV1	ARV1 homolog, fatty acid homeostasis modulator	64801	-1.55918	1.75169e-08
6620026	ILMN_2328666	6	6p23	CD83	CD83 molecule	9308	-1.55737	1.14123e-07
6620600	ILMN_2223720	16	16q23.2	ATMIN	ATM interactor	23300	-1.55705	7.42854e-06
3180196	ILMN_2225709	NA	NA	NA	NA		-1.55542	2.5303e-09
3400332	ILMN_1802205	2	2p24.1	RHOB	ras homolog family member B	388	-1.55253	1.80797e-08
2970402	ILMN_1766803	22	22q13.33	TUBGCP6	tubulin gamma complex associated protein 6	85378	-1.55099	2.12334e-05
5910154	ILMN_2044832	20	20p13	NOP56	NOP56 ribonucleoprotein	10528	-1.55066	1.37702e-10
150039	ILMN_2049063	13	13q14.11	KBTBD6	kelch repeat and BTB domain containing 6	89890	-1.54949	2.36605e-09
990672	ILMN_1721575	15	15q15.1	VPS18	VPS18, CORVET/HOPS core subunit	57617	-1.5491	3.09419e-06
6380131	ILMN_1671839	16	16q24.1	TAF1C	TATA-box binding protein associated factor, RNA polymerase I subunit C	9013	-1.54837	1.53325e-08
6100154	ILMN_1730631	2	2p23.3	WDCP	WD repeat and coiled coil containing	80304	-1.54556	7.34036e-09
7100008	ILMN_1653553	14	14q32.33	TEDC1	tubulin epsilon and delta complex 1	283643	-1.54542	2.34788e-09
3850722	ILMN_2231020	2	2q14.2	TMEM185B	transmembrane protein 185B	79134	-1.5451	2.75463e-09
6480474	ILMN_1659058	6	6p21.33	PPP1R10	protein phosphatase 1 regulatory subunit 10	5514	-1.54322	2.14822e-07
510129	ILMN_1669377	1	1p13.2	AP4B1	adaptor related protein complex 4 subunit beta 1	10717	-1.54143	1.07454e-10
3610091	ILMN_1765044	10	10q24.2	CUTC	cutC copper transporter	51076	-1.54119	1.23787e-09
5420719	ILMN_1661594	2	2p13.3	C2orf42	chromosome 2 open reading frame 42	54980	-1.53984	6.73186e-09
240348	ILMN_2059535	22	22q11.22	PPM1F	protein phosphatase, Mg2+/Mn2+ dependent 1F	9647	-1.53923	7.10481e-12
4290014	ILMN_1663667	1	1q21.3	FLAD1	flavin adenine dinucleotide synthetase 1	80308	-1.53908	3.36833e-08
5050608	ILMN_1664231	10	10q11.22	TIMM23	translocase of inner mitochondrial membrane 23	100287932	-1.53889	1.84415e-10
5340209	ILMN_1789616	7	7p15.3	NUPL2	nucleoporin like 2	11097	-1.53528	9.2131e-10
5570246	ILMN_1695745	1	1q41	DISP1	dispatched RND transporter family member 1	84976	-1.53511	7.63746e-08
1690161	ILMN_3251467	3	3q13.33	LRRC58	leucine rich repeat containing 58	116064	-1.53488	1.70615e-10
1500048	ILMN_2275803	17	17q25.3	LRRC45	leucine rich repeat containing 45	201255	-1.53478	5.3968e-06
4120193	ILMN_1761946	2	2q11.1	PROM2	prominin 2	150696	-1.53418	5.39826e-08
1260020	ILMN_2358919	2	2p23.3	TP53I3	tumor protein p53 inducible protein 3	9540	-1.53381	1.60177e-07
6960544	ILMN_2231021	2	2q14.2	TMEM185B	transmembrane protein 185B	79134	-1.5336	2.84165e-09
3190020	ILMN_1791656	10	10q26.2	EDRF1	erythroid differentiation regulatory factor 1	26098	-1.53172	5.07625e-06
6450685	ILMN_1791569	3	3q21.3	PLXNA1	plexin A1	5361	-1.52802	1.80908e-07
1090367	ILMN_1805826	13	13q33.1	BIVM	basic, immunoglobulin-like variable motif containing	54841	-1.52741	1.38512e-07
4560576	ILMN_1738523	3	3p22.2	MYD88	MYD88, innate immune signal transduction adaptor	4615	-1.52658	8.99025e-10
4480546	ILMN_1690352	10	10q21.3	ADO	2-aminoethanethiol dioxygenase	84890	-1.52528	3.41771e-09
7380367	ILMN_3244065	9	9q34.3	TMEM250	transmembrane protein 250	90120	-1.52423	4.17673e-08
60221	ILMN_2399497	19	19p13.11	RFXANK	regulatory factor X associated ankyrin containing protein	8625	-1.52327	1.52346e-06
2490170	ILMN_1706558	2	2p23.2	TRMT61B	tRNA methyltransferase 61B	55006	-1.52137	4.03084e-07
2850347	ILMN_3248803	NA	NA	NA	NA		-1.52039	3.09305e-06
5960450	ILMN_2358914	20	20q13.12	SLC35C2	solute carrier family 35 member C2	51006	-1.52027	6.47464e-07
1010152	ILMN_1668469	4	4q31.3	TMEM131L	transmembrane 131 like	23240	-1.51932	1.36225e-09
4900689	ILMN_1727553	5	5q33.3	ZBED8	zinc finger BED-type containing 8	63920	-1.51673	5.71997e-09
3840747	ILMN_2047676	2	2q32.2	OSGEPL1	O-sialoglycoprotein endopeptidase like 1	64172	-1.51315	6.22881e-08
830215	ILMN_1745513	22	22q13.2	MCAT	malonyl-CoA-acyl carrier protein transacylase	27349	-1.51266	2.71145e-07
1470609	ILMN_1653263	5	5q35.2	GPRIN1	G protein regulated inducer of neurite outgrowth 1	114787	-1.51144	1.02829e-05
5490301	ILMN_3303612	20	20q13.12	PABPC1L	poly(A) binding protein cytoplasmic 1 like	80336	-1.51133	0.00523942
4780561	ILMN_3247723	5	5q35.2	NOP16	NOP16 nucleolar protein	51491	-1.5111	1.92344e-07
4050646	ILMN_1655051	NA	NA	NA	NA		-1.5105	3.44569e-06
520341	ILMN_1669259	11	11q21	ANKRD49	ankyrin repeat domain 49	54851	-1.51002	1.88948e-07
1470296	ILMN_2339266	6	6q22.33	LAMA2	laminin subunit alpha 2	3908	-1.50957	6.13261e-11
7200161	ILMN_1801124	11	11q22.3	MSANTD4	Myb/SANT DNA binding domain containing 4 with coiled-coils	84437	-1.50555	1.2371e-08
7650025	ILMN_1727281	11	11q12.3	TAF6L	TATA-box binding protein associated factor 6 like	10629	-1.5044	6.63911e-08
6370273	ILMN_1783285	1	1p34.2	CTPS1	CTP synthase 1	1503	-1.50243	5.81891e-10
5390372	ILMN_1683065	2	2q11.2	COA5	cytochrome c oxidase assembly factor 5	493753	-1.49866	5.0183e-07
6370364	ILMN_1663575	NA	NA	NA	NA		-1.49728	2.86101e-09
630152	ILMN_1791545	17	17q21.2	KRT23	keratin 23	25984	-1.49633	2.1155e-07
5130594	ILMN_1805863	17	17p13.3	WDR81	WD repeat domain 81	124997	-1.49358	6.97941e-06
3800725	ILMN_1729281	19	19q13.33	SPHK2	sphingosine kinase 2	56848	-1.49354	3.38689e-08
6650452	ILMN_1661653	15	15q26.1	DET1	DET1, COP1 ubiquitin ligase partner	55070	-1.4899	3.59947e-08
6960367	ILMN_2241124	6	c("6p12.3", "6")	ADGRF1	adhesion G protein-coupled receptor F1	266977	-1.48813	1.23336e-09
780379	ILMN_1698777	14	14q24.3	ADCK1	aarF domain containing kinase 1	57143	-1.48757	4.80827e-08
360259	ILMN_2241775	1	1q31.2	TROVE2	TROVE domain family member 2	6738	-1.48567	1.70567e-10
1430475	ILMN_1704472	19	19q13.2	EID2	EP300 interacting inhibitor of differentiation 2	163126	-1.48477	6.12532e-07
3840397	ILMN_1768273	8	8q22.2	POP1	POP1 homolog, ribonuclease P/MRP subunit	10940	-1.48476	7.10644e-08
110328	ILMN_1779279	14	14q22.3	MAPK1IP1L	mitogen-activated protein kinase 1 interacting protein 1 like	93487	-1.48457	6.82781e-09
4210102	ILMN_1708382	3	3p21.31	ELP6	elongator acetyltransferase complex subunit 6	54859	-1.48226	1.18447e-08
3840446	ILMN_1773493	10	10q11.22	TIMM23	translocase of inner mitochondrial membrane 23	100287932	-1.4808	4.04876e-08
4260152	ILMN_2065606	1	1q23.3	TOMM40L	translocase of outer mitochondrial membrane 40 like	84134	-1.47996	9.03356e-06
6100630	ILMN_1764764	19	19p13.3	MUM1	melanoma associated antigen (mutated) 1	84939	-1.47967	6.221e-08
4230050	ILMN_1679555	10	10q11.22	TIMM23	translocase of inner mitochondrial membrane 23	100287932	-1.47799	1.1335e-10
4050239	ILMN_1655608	3	3p21.31	KLHL18	kelch like family member 18	23276	-1.47775	4.29849e-07
620497	ILMN_1782730	19	19q13.33	ZNF473	zinc finger protein 473	25888	-1.47719	5.11766e-08
3190338	ILMN_1726466	9	9q32	HDHD3	haloacid dehalogenase like hydrolase domain containing 3	81932	-1.47603	3.42693e-08
7510408	ILMN_1718629	21	21q11.2-q21.1	NRIP1	nuclear receptor interacting protein 1	8204	-1.47506	1.45584e-08
1770338	ILMN_2391345	9	9p13.3	RPP25L	ribonuclease P/MRP subunit p25 like	138716	-1.4749	2.22862e-06
130669	ILMN_2361695	14	14q32.33	BAG5	BCL2 associated athanogene 5	9529	-1.47477	2.74996e-10
520577	ILMN_1673746	10	10q11.22	TIMM23	translocase of inner mitochondrial membrane 23	100287932	-1.47368	3.48682e-06
5310181	ILMN_1755711	17	17p13.1	CTC1	CST telomere replication complex component 1	80169	-1.47327	3.76498e-09
2900110	ILMN_1683533	3	3p14.3	CCDC66	coiled-coil domain containing 66	285331	-1.47297	4.80519e-07
2710187	ILMN_1664177	1	1p13.3	ATXN7L2	ataxin 7 like 2	127002	-1.47148	5.94263e-08
6220386	ILMN_2277419	17	17q25.3	SLC38A10	solute carrier family 38 member 10	124565	-1.46875	7.20584e-08
3420228	ILMN_1748831	14	14q32.33	PPP1R13B	protein phosphatase 1 regulatory subunit 13B	23368	-1.46807	5.08746e-07
2600452	ILMN_1778032	9	9q34.2	SURF6	surfeit 6	6838	-1.46621	2.55053e-09
3420253	ILMN_1762002	11	11p13	CSTF3	cleavage stimulation factor subunit 3	1479	-1.46586	1.82581e-05
6130441	ILMN_1815184	1	1q31.3	ASPM	abnormal spindle microtubule assembly	259266	-1.46498	7.05676e-06
6280482	ILMN_1704305	16	16q22.1	NIP7	NIP7, nucleolar pre-rRNA processing protein	51388	-1.46496	2.34892e-12
7210377	ILMN_2218935	7	7q31.33	GPR37	G protein-coupled receptor 37	2861	-1.46315	7.0435e-07
1260064	ILMN_3239925	5	5p15.33	PP7080	uncharacterized LOC25845	25845	-1.46299	7.45673e-10
510180	ILMN_1789400	1	1p33	FOXD2	forkhead box D2	2306	-1.46291	8.54193e-07
3440608	ILMN_1785177	12	12q13.2	DNAJC14	DnaJ heat shock protein family (Hsp40) member C14	85406	-1.46207	1.52643e-09
620543	ILMN_2200917	3	3p24.1	SLC4A7	solute carrier family 4 member 7	9497	-1.45852	1.1646e-07
6840678	ILMN_3249435	11	11q24.1	UBASH3B	ubiquitin associated and SH3 domain containing B	84959	-1.45771	1.70874e-07
7050075	ILMN_1696556	1	1q42.13	URB2	URB2 ribosome biogenesis homolog	9816	-1.457	1.46771e-07
7380653	ILMN_1679405	7	7p13	DDX56	DEAD-box helicase 56	54606	-1.45648	2.51745e-09
5270343	ILMN_1774589	1	1p35.2	IQCC	IQ motif containing C	55721	-1.45401	4.38048e-07
2810730	ILMN_2322842	12	12q12	PPHLN1	periphilin 1	51535	-1.45342	6.95466e-09
2480040	ILMN_1666221	9	9q22.31	ANKRD19P	ankyrin repeat domain 19, pseudogene	138649	-1.45268	0.0359158
5810273	ILMN_1685854	5	5q31.3	IGIP	IgA inducing protein	492311	-1.45156	1.64468e-05
2100452	ILMN_1815723	2	2q32.1	NUP35	nucleoporin 35	129401	-1.44995	8.40999e-07
6940328	ILMN_2366790	17	17q12	DDX52	DExD-box helicase 52	11056	-1.44823	2.38521e-08
6620441	ILMN_1735360	4	4q21.1	SDAD1	SDA1 domain containing 1	55153	-1.44696	6.30268e-10
6200132	ILMN_1704398	7	7q11.23	FZD9	frizzled class receptor 9	8326	-1.4459	3.30593e-12
2680538	ILMN_1688464	3	3q27.1	MAP6D1	MAP6 domain containing 1	79929	-1.44558	8.65049e-10
6590731	ILMN_1783806	6	6p22.3	DTNBP1	dystrobrevin binding protein 1	84062	-1.44434	1.46335e-09
20243	ILMN_1691432	12	12q23.3	PRDM4	PR/SET domain 4	11108	-1.44393	8.80029e-10
1300187	ILMN_1660723	19	19q13.42	RDH13	retinol dehydrogenase 13	112724	-1.44322	1.26345e-06
630673	ILMN_1660938	1	1p34.1	TOE1	target of EGR1, exonuclease	114034	-1.44086	6.43729e-08
7160100	ILMN_1796210	10	10q24.32	PPRC1	peroxisome proliferator-activated receptor gamma, coactivator-related 1	23082	-1.4406	3.25697e-09
1190497	ILMN_2350114	13	13q14.2	TRIM13	tripartite motif containing 13	10206	-1.44033	4.36292e-08
6510368	ILMN_1710207	10	10q24.31	SLF2	SMC5-SMC6 complex localization factor 2	55719	-1.43932	1.23881e-08
6550025	ILMN_1693317	2	2p25.3	TRAPPC12	trafficking protein particle complex 12	51112	-1.43565	1.2552e-09
1410538	ILMN_2119774	11	11p15.2	CYP2R1	cytochrome P450 family 2 subfamily R member 1	120227	-1.43437	3.30166e-07
7000543	ILMN_1862043	NA	NA	NA	NA		-1.43416	1.94449e-07
3940255	ILMN_2120917	11	11p15.4	CTR9	CTR9 homolog, Paf1/RNA polymerase II complex component	9646	-1.4337	4.78564e-06
20156	ILMN_3238633	11	11q12.2	SDHAF2	succinate dehydrogenase complex assembly factor 2	54949	-1.43293	1.38815e-10
1820497	ILMN_1690066	4	4q22.1	TIGD2	tigger transposable element derived 2	166815	-1.43204	2.31401e-05
6560193	ILMN_2083567	16	16q22.2	PHLPP2	PH domain and leucine rich repeat protein phosphatase 2	23035	-1.43195	3.32407e-09
2190189	ILMN_1748476	2	2q33.1	NOP58	NOP58 ribonucleoprotein	51602	-1.43015	2.09866e-06
1940670	ILMN_1769532	8	8p23.1	FAM86B1	family with sequence similarity 86 member B1	85002	-1.4298	3.06917e-07
130408	ILMN_1756525	1	1q25.1	KLHL20	kelch like family member 20	27252	-1.42645	4.25317e-07
5670095	ILMN_1748427	10	10q11.21	ZNF239	zinc finger protein 239	8187	-1.42491	8.4843e-09
4280204	ILMN_1692651	17	17q21.33	PHB	prohibitin	5245	-1.42425	9.22067e-08
770411	ILMN_1795285	5	5q31.1	JADE2	jade family PHD finger 2	23338	-1.42225	1.43222e-06
2320037	ILMN_1764851	20	20q13.12	TP53RK	TP53 regulating kinase	112858	-1.42014	2.13056e-07
5700132	ILMN_1743643	3	3q21.3	ZXDC	ZXD family zinc finger C	79364	-1.41941	1.23297e-08
1010161	ILMN_1704842	7	7p21.3	ARL4A	ADP ribosylation factor like GTPase 4A	10124	-1.41705	8.35818e-08
4760091	ILMN_3265365	9	9q21.2	CEP78	centrosomal protein 78	84131	-1.41671	4.58624e-11
3450326	ILMN_1716547	2	2p13.3	NAGK	N-acetylglucosamine kinase	55577	-1.4165	6.65557e-08
4830427	ILMN_1778890	14	14q21.3	LRR1	leucine rich repeat protein 1	122769	-1.41008	3.24737e-09
6370044	ILMN_1763842	9	9q34.11	PTRH1	peptidyl-tRNA hydrolase 1 homolog	138428	-1.41005	3.79985e-06
520292	ILMN_1653319	16	16q24.3	MC1R	melanocortin 1 receptor	4157	-1.40919	1.15888e-06
7380463	ILMN_2193752	5	5q14.3	MBLAC2	metallo-beta-lactamase domain containing 2	153364	-1.40887	3.19326e-08
1230274	ILMN_1806713	17	17p12	ZNF18	zinc finger protein 18	7566	-1.40867	9.69547e-06
4290521	ILMN_1731137	2	2q11.2	TXNDC9	thioredoxin domain containing 9	10190	-1.40856	3.18524e-07
1170349	ILMN_1782389	1	1q32.1	LAD1	ladinin 1	3898	-1.40694	3.45782e-07
5420400	ILMN_1750051	X	Xq11.2	AMER1	APC membrane recruitment protein 1	139285	-1.40533	5.56154e-08
4830343	ILMN_1731070	16	16q11.2	ORC6	origin recognition complex subunit 6	23594	-1.40511	4.77777e-07
2480114	ILMN_2387990	1	1p36.33	UBE2J2	ubiquitin conjugating enzyme E2 J2	118424	-1.40483	0.000240694
6040554	ILMN_1744240	8	8q24.13	TBC1D31	TBC1 domain family member 31	93594	-1.40478	8.59247e-10
2450717	ILMN_1709484	15	15q26.1	BLM	BLM RecQ like helicase	641	-1.40439	4.97769e-09
6180465	ILMN_1778321	9	9q34.2	SLC2A6	solute carrier family 2 member 6	11182	-1.4043	3.0322e-08
1070360	ILMN_1788135	NA	NA	NA	NA		-1.40224	2.65777e-08
6060326	ILMN_1782110	21	21q22.3	ZBTB21	zinc finger and BTB domain containing 21	49854	-1.4015	8.25525e-08
1050132	ILMN_1682449	4	4p16.1	ZNF518B	zinc finger protein 518B	85460	-1.40104	1.23102e-07
5720465	ILMN_1803073	10	10q21.3	DNAJC12	DnaJ heat shock protein family (Hsp40) member C12	56521	-1.40074	5.90084e-08
1820133	ILMN_1781721	9	9q34.13	DDX31	DEAD-box helicase 31	64794	-1.40054	6.37781e-09
6110575	ILMN_1690101	3	3q22.3	FAIM	Fas apoptotic inhibitory molecule	55179	-1.39983	1.65749e-06
1030768	ILMN_1809040	1	1p36.11	LDLRAP1	low density lipoprotein receptor adaptor protein 1	26119	-1.39808	6.49926e-07
5670088	ILMN_1654737	9	9q33.1	TRIM32	tripartite motif containing 32	22954	-1.39639	8.03207e-10
5890538	ILMN_1719985	19	19p13.3	FEM1A	fem-1 homolog A	55527	-1.39498	2.73435e-07
7550743	ILMN_1682694	X	Xq28	VMA21	VMA21, vacuolar ATPase assembly factor	203547	-1.3939	7.71429e-10
5560465	ILMN_1705407	20	20p13	NOP56	NOP56 ribonucleoprotein	10528	-1.3934	1.06187e-07
670598	ILMN_1695271	15	15q24.2	RPP25	ribonuclease P and MRP subunit p25	54913	-1.3925	4.20361e-05
5050040	ILMN_1741054	2	2p23.3	SLC5A6	solute carrier family 5 member 6	8884	-1.39064	7.87427e-10
1690630	ILMN_1706015	3	3q29	FAM43A	family with sequence similarity 43 member A	131583	-1.3903	4.75614e-08
6270437	ILMN_1746465	11	11p13	FJX1	four-jointed box kinase 1	24147	-1.38874	2.71278e-07
6220327	ILMN_1747771	4	4p16.3	MAEA	macrophage erythroblast attacher	10296	-1.38817	4.23724e-10
4590040	ILMN_1712803	5	5q13.2	CCNB1	cyclin B1	891	-1.3878	1.56977e-10
3290152	ILMN_1778560	7	7q22.1	ZNF3	zinc finger protein 3	7551	-1.38712	1.71207e-06
3130598	ILMN_1688178	22	22q13.2	RRP7A	ribosomal RNA processing 7 homolog A	27341	-1.38677	1.63407e-08
4890324	ILMN_1838313	1	1p22.2	LRRC8B	leucine rich repeat containing 8 VRAC subunit B	23507	-1.38555	1.74694e-09
7320402	ILMN_2320513	5	5q31.3	APBB3	amyloid beta precursor protein binding family B member 3	10307	-1.38483	2.60943e-05
6380553	ILMN_1697959	7	7q33	SLC35B4	solute carrier family 35 member B4	84912	-1.38245	1.13073e-07
3850292	ILMN_1813938	3	3p25.1	CHCHD4	coiled-coil-helix-coiled-coil-helix domain containing 4	131474	-1.38142	3.79882e-10
1990253	ILMN_1777096	12	12q23.3	TDG	thymine DNA glycosylase	6996	-1.38069	1.73237e-11
2600431	ILMN_2330307	11	11q12.1	SLC43A3	solute carrier family 43 member 3	29015	-1.37804	6.70848e-07
4830328	ILMN_1738718	3	3p21.31	CYB561D2	cytochrome b561 family member D2	11068	-1.37773	3.29597e-06
3800176	ILMN_1775192	6	6q23.3	BCLAF1	BCL2 associated transcription factor 1	9774	-1.37681	8.39908e-09
580671	ILMN_1769449	5	5q14.3	MBLAC2	metallo-beta-lactamase domain containing 2	153364	-1.37654	3.26878e-07
5310458	ILMN_1687316	1	1p34.3	NCDN	neurochondrin	23154	-1.37574	3.36213e-05
5390561	ILMN_1766981	2	2q11.2	UNC50	unc-50 inner nuclear membrane RNA binding protein	25972	-1.3751	4.54978e-10
6110246	ILMN_1759595	22	22q11.21	RTL10	retrotransposon Gag like 10	79680	-1.37366	3.21105e-06
2070619	ILMN_1805271	4	4p16.3	ZNF721	zinc finger protein 721	170960	-1.37349	1.18076e-06
6330754	ILMN_1776325	1	1q21.3	UBE2Q1	ubiquitin conjugating enzyme E2 Q1	55585	-1.37292	2.87699e-07
5220504	ILMN_1744138	8	8q12.1	CHCHD7	coiled-coil-helix-coiled-coil-helix domain containing 7	79145	-1.37245	2.41807e-07
290053	ILMN_1694223	22	22q11.21	DGCR8	DGCR8, microprocessor complex subunit	54487	-1.37133	5.98173e-09
360181	ILMN_1788019	6	6q22.33	LAMA2	laminin subunit alpha 2	3908	-1.36829	2.39318e-07
3370487	ILMN_2335718	5	5q35.3	HNRNPAB	heterogeneous nuclear ribonucleoprotein A/B	3182	-1.36799	6.54026e-08
990017	ILMN_1806631	9	9q34.3	TMEM203	transmembrane protein 203	94107	-1.36798	8.89012e-07
6250072	ILMN_1806757	17	17p13.2	MYBBP1A	MYB binding protein 1a	10514	-1.3677	2.31073e-06
830424	ILMN_2152581	6	6p21.31	STK38	serine/threonine kinase 38	11329	-1.3659	5.67221e-09
270403	ILMN_2390472	3	3q26.33	TTC14	tetratricopeptide repeat domain 14	151613	-1.36461	2.95877e-05
3450563	ILMN_1728975	17	17p13.1	SCO1	SCO1, cytochrome c oxidase assembly protein	6341	-1.36443	8.15005e-09
4220270	ILMN_2214098	13	13q33.1	BIVM	basic, immunoglobulin-like variable motif containing	54841	-1.36308	4.94891e-07
1240333	ILMN_1903159	14	14q23.1	PPM1A	protein phosphatase, Mg2+/Mn2+ dependent 1A	5494	-1.36214	4.21404e-08
450170	ILMN_3247504	19	19q13.12	HAUS5	HAUS augmin like complex subunit 5	23354	-1.35954	1.4059e-08
7380673	ILMN_1673960	5	5q34	MAT2B	methionine adenosyltransferase 2B	27430	-1.35933	1.30525e-06
6660343	ILMN_1700604	11	11q13.2	RBM14	RNA binding motif protein 14	10432	-1.35914	2.27498e-09
2760520	ILMN_2169089	18	18q21.2	C18orf54	chromosome 18 open reading frame 54	162681	-1.35863	4.91077e-09
670082	ILMN_2216157	7	7p22.3-p22.2	GNA12	G protein subunit alpha 12	2768	-1.35785	7.01239e-08
2340059	ILMN_2194828	16	16p11.2	PAGR1	PAXIP1 associated glutamate rich protein 1	79447	-1.35558	1.67249e-09
5910433	ILMN_3251423	3	3p21.1	CHDH	choline dehydrogenase	55349	-1.35555	1.81003e-09
450670	ILMN_3307786	22	22q13.2	L3MBTL2	L3MBTL2, polycomb repressive complex 1 subunit	83746	-1.35551	9.54327e-07
380370	ILMN_1704055	NA	NA	NA	NA		-1.35489	1.06517e-06
1980088	ILMN_1832208	4	4p13	TMEM33	transmembrane protein 33	55161	-1.35431	4.97392e-10
60370	ILMN_2054213	13	13q12.11	MPHOSPH8	M-phase phosphoprotein 8	54737	-1.35048	7.63924e-10
3990605	ILMN_2145423	15	15q26.1	DET1	DET1, COP1 ubiquitin ligase partner	55070	-1.35036	2.87398e-07
5890241	ILMN_1798061	14	14q24.1	ZFYVE26	zinc finger FYVE-type containing 26	23503	-1.35007	4.02271e-06
240487	ILMN_1665384	1	1q44	SH3BP5L	SH3 binding domain protein 5 like	80851	-1.34943	6.02011e-05
5390433	ILMN_2349831	14	14q32.13	DICER1	dicer 1, ribonuclease III	23405	-1.34847	1.38696e-05
6560066	ILMN_1772302	NA	NA	NA	NA		-1.34645	2.30471e-06
6280609	ILMN_2223805	7	7q32.2	CEP41	centrosomal protein 41	95681	-1.34611	1.39601e-07
430309	ILMN_1659524	6	6q16.1	NDUFAF4	NADH:ubiquinone oxidoreductase complex assembly factor 4	29078	-1.34576	1.90603e-06
3400164	ILMN_1758806	21	21q22.3	CFAP410	cilia and flagella associated protein 410	755	-1.34516	4.18333e-06
1010168	ILMN_1659285	21	21q22.2	PSMG1	proteasome assembly chaperone 1	8624	-1.34176	3.74199e-09
6200243	ILMN_2057566	16	16p13.3	PGP	phosphoglycolate phosphatase	283871	-1.34166	2.92275e-06
7650195	ILMN_3200362	NA	NA	NA	NA		-1.3414	0.00475282
150528	ILMN_2327090	4	4p16.3	MAEA	macrophage erythroblast attacher	10296	-1.33948	1.82724e-07
3370746	ILMN_1659937	6	6q21	ZBTB24	zinc finger and BTB domain containing 24	9841	-1.33868	1.22769e-10
5700167	ILMN_1767219	6	6p21.1	POLR1C	RNA polymerase I and III subunit C	9533	-1.33848	3.76562e-09
6110035	ILMN_1695983	17	17q23.3	DDX42	DEAD-box helicase 42	11325	-1.33776	4.06132e-09
1010446	ILMN_1729288	22	22q12.3	C1QTNF6	C1q and TNF related 6	114904	-1.33602	8.60068e-08
770437	ILMN_1688818	10	10q11.22	TIMM23	translocase of inner mitochondrial membrane 23	100287932	-1.33396	3.62509e-10
1820452	ILMN_3262250	3	3q21.2	FAM86JP	family with sequence similarity 86, member A pseudogene	100125556	-1.32953	7.0884e-08
2480577	ILMN_2340259	1	1p31.3	PDE4B	phosphodiesterase 4B	5142	-1.32863	4.27945e-07
2680703	ILMN_3251634	3	3q29	SENP5	SUMO specific peptidase 5	205564	-1.32857	1.52734e-07
3940451	ILMN_1803590	12	12q21.1	ZFC3H1	zinc finger C3H1-type containing	196441	-1.32832	5.24918e-05
5550220	ILMN_1787628	20	20p13	NOP56	NOP56 ribonucleoprotein	10528	-1.32822	4.56087e-07
150681	ILMN_1668540	1	1p22.3	ZNHIT6	zinc finger HIT-type containing 6	54680	-1.32752	2.59394e-11
4200386	ILMN_1743352	6	6p21.1	TBCC	tubulin folding cofactor C	6903	-1.32681	2.16788e-05
7040064	ILMN_3236135	3	3p12.3	FAM86DP	family with sequence similarity 86 member D, pseudogene	692099	-1.32652	6.9065e-10
1090280	ILMN_1730888	7	7q11.21	ZNF680	zinc finger protein 680	340252	-1.32395	3.6092e-05
520600	ILMN_2199022	17	17q25.1	SAP30BP	SAP30 binding protein	29115	-1.31983	2.41617e-06
650598	ILMN_2397880	11	11p13	CSTF3	cleavage stimulation factor subunit 3	1479	-1.31965	3.56013e-06
7380131	ILMN_1652300	19	19q13.11	ZNF507	zinc finger protein 507	22847	-1.31866	1.34264e-07
5310066	ILMN_3236010	12	12p13.31	SCARNA11	small Cajal body-specific RNA 11	677780	-1.31832	2.30659e-06
1940253	ILMN_1760593	12	12q23.3	CRY1	cryptochrome circadian regulator 1	1407	-1.31793	9.01348e-05
4220452	ILMN_2328977	20	20q11.21	DNMT3B	DNA methyltransferase 3 beta	1789	-1.31738	5.36366e-05
2480026	ILMN_1665289	17	17q25.3	OGFOD3	2-oxoglutarate and iron dependent oxygenase domain containing 3	79701	-1.31721	2.92532e-06
5670382	ILMN_1703686	14	14q32.33	BRF1	BRF1, RNA polymerase III transcription initiation factor subunit	2972	-1.31534	5.00953e-06
990162	ILMN_2234710	12	12p13.1-p12.3	C12orf60	chromosome 12 open reading frame 60	144608	-1.3153	4.09881e-08
6100735	ILMN_2411559	12	12q24.33	PUS1	pseudouridine synthase 1	80324	-1.31525	3.74199e-05
430392	ILMN_2298860	NA	NA	NA	NA		-1.3149	3.08493e-06
6550288	ILMN_1811104	3	3q13.33	POGLUT1	protein O-glucosyltransferase 1	56983	-1.31478	1.00281e-08
3420097	ILMN_1733703	22	22q13.31	TRMU	tRNA 5-methylaminomethyl-2-thiouridylate methyltransferase	55687	-1.31373	5.1453e-05
5490102	ILMN_1745423	4	4q13.3	UTP3	UTP3, small subunit processome component	57050	-1.31359	3.72752e-06
3800110	ILMN_1705093	7	7q22.1-q22.2	ORC5	origin recognition complex subunit 5	5001	-1.31357	1.1808e-08
5810440	ILMN_1651262	5	5q35.3	HNRNPAB	heterogeneous nuclear ribonucleoprotein A/B	3182	-1.3131	3.23624e-08
6200528	ILMN_1689189	11	11q12.3	ZBTB3	zinc finger and BTB domain containing 3	79842	-1.31237	3.10728e-07
6860747	ILMN_3251298	10	10p12.1	THNSL1	threonine synthase like 1	79896	-1.31182	1.11059e-07
940300	ILMN_2043615	17	17q25.3	OXLD1	oxidoreductase like domain containing 1	339229	-1.31104	6.52047e-09
1090564	ILMN_1654629	4	4p16.3	TMEM175	transmembrane protein 175	84286	-1.31077	8.66376e-07
1940576	ILMN_1704557	17	17q23.1	RPS6KB1	ribosomal protein S6 kinase B1	6198	-1.31052	1.27304e-09
6510025	ILMN_1679134	10	10q26.13	NSMCE4A	NSE4 homolog A, SMC5-SMC6 complex component	54780	-1.30983	2.83282e-09
3180553	ILMN_2105923	12	12p13.33	RHNO1	RAD9-HUS1-RAD1 interacting nuclear orphan 1	83695	-1.30951	8.73005e-10
450673	ILMN_1691111	16	16q24.3	SPATA2L	spermatogenesis associated 2 like	124044	-1.30881	3.47133e-07
3360156	ILMN_1722239	X	Xq22.1	TIMM8A	translocase of inner mitochondrial membrane 8A	1678	-1.30847	4.31656e-06
2190056	ILMN_1748481	17	17q11.2	TMEM199	transmembrane protein 199	147007	-1.30793	1.09784e-06
7610326	ILMN_1683273	15	15q22.31	SNAPC5	small nuclear RNA activating complex polypeptide 5	10302	-1.30701	0.000103025
2190563	ILMN_1651405	5	5p15.33	BRD9	bromodomain containing 9	65980	-1.30698	3.40036e-08
2940632	ILMN_1731044	NA	NA	NA	NA		-1.30498	1.73451e-07
4760014	ILMN_1698996	21	21q22.3	SLC19A1	solute carrier family 19 member 1	6573	-1.30445	0.000136441
270176	ILMN_2124241	X	Xq22.3	MUM1L1	MUM1 like 1	139221	-1.30384	8.15808e-06
5870605	ILMN_1900661	NA	NA	NA	NA		-1.30257	1.81491e-08
1400044	ILMN_2081087	10	10q25.3	HSPA12A	heat shock protein family A (Hsp70) member 12A	259217	-1.29894	6.15478e-07
5260056	ILMN_1692123	10	10q24.32	ELOVL3	ELOVL fatty acid elongase 3	83401	-1.29852	7.63714e-07
6520553	ILMN_1897310	4	4p16.3	LETM1	leucine zipper and EF-hand containing transmembrane protein 1	3954	-1.29831	2.16872e-05
1410408	ILMN_1721626	10	10q21.2	ARID5B	AT-rich interaction domain 5B	84159	-1.29806	9.72622e-05
3840360	ILMN_2347888	12	12q13.12	LARP4	La ribonucleoprotein domain family member 4	113251	-1.29714	3.86317e-07
6420551	ILMN_1751898	12	12p13.32	C12orf4	chromosome 12 open reading frame 4	57102	-1.29701	1.60816e-08
6660010	ILMN_2072391	11	11q12.3	SNORD31	small nucleolar RNA, C/D box 31	9298	-1.29648	8.06833e-05
6860524	ILMN_1655635	14	14q11.2	METTL3	methyltransferase like 3	56339	-1.29582	5.5608e-06
6370528	ILMN_1681221	NA	NA	NA	NA		-1.29515	1.98155e-07
6280079	ILMN_1653129	X	Xq22.1	CSTF2	cleavage stimulation factor subunit 2	1478	-1.29486	9.51584e-08
1230639	ILMN_1814650	11	11q23.3	TRAPPC4	trafficking protein particle complex 4	51399	-1.29477	1.14344e-07
2760689	ILMN_2205032	X	Xq13.3	MAGEE1	MAGE family member E1	57692	-1.29336	1.11921e-06
2060646	ILMN_1693352	1	1p36.33	MRPL20	mitochondrial ribosomal protein L20	55052	-1.292	3.92229e-06
7100136	ILMN_2094266	1	1p36.31	HES2	hes family bHLH transcription factor 2	54626	-1.29199	8.6173e-06
6100382	ILMN_1680591	2	2p13.1	RTKN	rhotekin	6242	-1.2919	6.53843e-10
1050450	ILMN_1772703	8	8q21.3	OTUD6B	OTU domain containing 6B	51633	-1.2917	1.20296e-07
1850500	ILMN_3241169	3	3p21.31	ELP6	elongator acetyltransferase complex subunit 6	54859	-1.2912	2.67051e-07
1340463	ILMN_2377991	6	c("6p22.1", "6p22.3-p22.1")	ZSCAN31	zinc finger and SCAN domain containing 31	64288	-1.2905	8.44696e-06
5820427	ILMN_1806328	1	1p36.11	PDIK1L	PDLIM1 interacting kinase 1 like	149420	-1.28906	9.53251e-07
4760154	ILMN_2412384	8	8q22.1	CCNE2	cyclin E2	9134	-1.28846	9.21834e-07
4610136	ILMN_2383306	1	1q22-q23.1	GPATCH4	G-patch domain containing 4	54865	-1.28794	6.66124e-07
3360544	ILMN_1689624	3	3q11.2	RIOX2	ribosomal oxygenase 2	84864	-1.2878	3.21523e-05
3130102	ILMN_2097954	12	12q14.1	TSFM	Ts translation elongation factor, mitochondrial	10102	-1.28706	3.59861e-06
2060088	ILMN_1694731	16	16p13.3	CLCN7	chloride voltage-gated channel 7	1186	-1.28635	2.44927e-07
1050242	ILMN_1699421	4	4q32.3	ANXA10	annexin A10	11199	-1.28451	1.68578e-06
6060653	ILMN_1794692	20	20q11.21	DNMT3B	DNA methyltransferase 3 beta	1789	-1.28402	1.12284e-07
6510661	ILMN_1676625	20	20q13.33	SS18L1	SS18L1, nBAF chromatin remodeling complex subunit	26039	-1.28242	9.46786e-05
4070379	ILMN_1652846	17	17q25.3	PCYT2	phosphate cytidylyltransferase 2, ethanolamine	5833	-1.28216	7.06604e-08
1710639	ILMN_1743104	11	11q13.2	RBM4B	RNA binding motif protein 4B	83759	-1.28168	3.12712e-11
6250064	ILMN_1708375	5	5q31.1	IRF1	interferon regulatory factor 1	3659	-1.28128	8.15771e-06
5910609	ILMN_1652185	16	16p12.1	IL4R	interleukin 4 receptor	3566	-1.28035	7.46087e-08
6290161	ILMN_1732410	10	10q21.2	SLC16A9	solute carrier family 16 member 9	220963	-1.2794	1.88721e-06
4250470	ILMN_1793966	1	1q21.2	BOLA1	bolA family member 1	51027	-1.27908	4.22498e-06
6760343	ILMN_1659365	NA	NA	NA	NA		-1.27898	6.91499e-06
2350333	ILMN_1731181	17	17q23.3	TEX2	testis expressed 2	55852	-1.27883	1.69241e-08
3370093	ILMN_2094313	16	16q22.1	ZDHHC1	zinc finger DHHC-type containing 1	29800	-1.27743	1.21587e-07
5340338	ILMN_1777233	1	1p36.12	E2F2	E2F transcription factor 2	1870	-1.27714	1.97706e-07
4040450	ILMN_1682180	8	8q13.1	VCPIP1	valosin containing protein interacting protein 1	80124	-1.27666	2.26918e-06
1010653	ILMN_1746686	6	6p21.1	POLR1C	RNA polymerase I and III subunit C	9533	-1.27639	1.65767e-09
3800243	ILMN_1741985	12	12q21.2	BBS10	Bardet-Biedl syndrome 10	79738	-1.27613	2.1503e-07
2450136	ILMN_1779264	21	21q22.2	PSMG1	proteasome assembly chaperone 1	8624	-1.27542	1.9944e-07
3780161	ILMN_1739032	8	8q21.11	TMEM70	transmembrane protein 70	54968	-1.27533	4.01697e-08
3460091	ILMN_1654001	2	2p24.2	SMC6	structural maintenance of chromosomes 6	79677	-1.27532	3.07758e-06
4540064	ILMN_1711823	17	17q25.3	FAAP100	FA core complex associated protein 100	80233	-1.27531	2.21923e-08
3390017	ILMN_1726769	18	18q22.3	CNDP2	carnosine dipeptidase 2	55748	-1.27499	6.36282e-11
6770209	ILMN_1652512	21	21q22.3	C2CD2	C2 calcium dependent domain containing 2	25966	-1.2739	1.22201e-08
4670193	ILMN_1740633	10	10q22.1	PRF1	perforin 1	5551	-1.27358	5.58544e-07
4850079	ILMN_1728626	9	9q34.2	WDR5	WD repeat domain 5	11091	-1.27349	1.1541e-06
5420019	ILMN_2322986	3	3q11.2	RIOX2	ribosomal oxygenase 2	84864	-1.27301	2.81367e-09
770221	ILMN_1718712	20	20q13.33	FAM217B	family with sequence similarity 217 member B	63939	-1.2729	1.00603e-05
3830095	ILMN_1678962	1	1p36.32	DFFB	DNA fragmentation factor subunit beta	1677	-1.26953	9.45996e-10
5560112	ILMN_1689652	17	17p13.3	MRM3	mitochondrial rRNA methyltransferase 3	55178	-1.26835	2.4748e-10
2190356	ILMN_1735151	3	3q26.2	EIF5A2	eukaryotic translation initiation factor 5A2	56648	-1.26801	3.86004e-05
4060242	ILMN_1857335	NA	NA	NA	NA		-1.26756	0.000696859
4860367	ILMN_2370464	3	3p21.31	ATRIP	ATR interacting protein	84126	-1.26742	7.68225e-10
4850543	ILMN_1710553	11	11q13.2	TMEM151A	transmembrane protein 151A	256472	-1.26364	6.99014e-05
3420377	ILMN_3238889	1	1q21.2	RPRD2	regulation of nuclear pre-mRNA domain containing 2	23248	-1.2624	6.71342e-08
6370288	ILMN_1702676	17	17p13.1	CTC1	CST telomere replication complex component 1	80169	-1.26216	2.59958e-07
1510170	ILMN_1664878	19	19q13.42	NLRP2	NLR family pyrin domain containing 2	55655	-1.26199	6.56903e-09
4010470	ILMN_3238740	16	16q24.3	CENPBD1	CENPB DNA-binding domain containing 1	92806	-1.26183	3.90324e-07
7200598	ILMN_1654543	14	14q24.2	MED6	mediator complex subunit 6	10001	-1.26148	1.38159e-10
540382	ILMN_1809963	17	17q21.33	RSAD1	radical S-adenosyl methionine domain containing 1	55316	-1.26121	6.52085e-06
2490288	ILMN_2325168	11	11q13.4	ARRB1	arrestin beta 1	408	-1.26098	7.35236e-07
2570707	ILMN_1754988	21	21q21.3	N6AMT1	N-6 adenine-specific DNA methyltransferase 1	29104	-1.26098	6.86357e-09
3610398	ILMN_1803005	1	1p34.1	MMACHC	metabolism of cobalamin associated C	25974	-1.25734	4.0203e-06
780259	ILMN_3235065	1	1p22.3	ZNHIT6	zinc finger HIT-type containing 6	54680	-1.25675	5.49484e-08
1260575	ILMN_2391551	13	13q13.3	PROSER1	proline and serine rich 1	80209	-1.25592	3.45682e-07
2570292	ILMN_2354211	1	1p35.3	RCC1	regulator of chromosome condensation 1	1104	-1.25585	3.3777e-06
3460468	ILMN_1690690	10	10q26.11-q26.12	SEC23IP	SEC23 interacting protein	11196	-1.25549	7.65241e-09
4920521	ILMN_3247681	2	2p11.2	C2orf68	chromosome 2 open reading frame 68	388969	-1.25461	1.41993e-05
3890189	ILMN_1746846	2	2q35	TTLL4	tubulin tyrosine ligase like 4	9654	-1.25406	4.92168e-08
3060347	ILMN_1678140	NA	NA	NA	NA		-1.25341	4.35234e-10
5900561	ILMN_1723212	6	6p21.31-p21.2	SRSF3	serine and arginine rich splicing factor 3	6428	-1.25161	3.05107e-08
4180301	ILMN_1658094	10	10q21.2	ZNF365	zinc finger protein 365	22891	-1.25137	1.86746e-07
2570187	ILMN_1728230	19	19q13.11	ZNF30	zinc finger protein 30	90075	-1.24973	2.48548e-07
6040767	ILMN_1701413	16	16p13.3	PIGQ	phosphatidylinositol glycan anchor biosynthesis class Q	9091	-1.24875	7.73611e-06
3520372	ILMN_1696675	16	16q22.1	CES2	carboxylesterase 2	8824	-1.2486	2.31069e-07
4050192	ILMN_1765500	21	21q22.3	NDUFV3	NADH:ubiquinone oxidoreductase subunit V3	4731	-1.24818	4.39133e-05
2570246	ILMN_1807152	9	9q33.3	GOLGA1	golgin A1	2800	-1.24787	1.17787e-07
7560048	ILMN_1714737	6	6q22.31	ASF1A	anti-silencing function 1A histone chaperone	25842	-1.24766	7.74025e-07
5720619	ILMN_1661443	15	15q23	GRAMD2A	GRAM domain containing 2A	196996	-1.24572	1.82349e-06
1110017	ILMN_1663090	21	21q22.11	SON	SON DNA binding protein	6651	-1.24422	3.20769e-08
5550709	ILMN_1694877	4	4q25	CASP6	caspase 6	839	-1.24359	2.28427e-06
130220	ILMN_1689800	1	1p36.13	MRTO4	MRT4 homolog, ribosome maturation factor	51154	-1.24337	3.03172e-05
1340360	ILMN_1720124	1	1p36.13	RCC2	regulator of chromosome condensation 2	55920	-1.24055	1.82571e-10
540541	ILMN_1673637	4	4p11	SLC10A4	solute carrier family 10 member 4	201780	-1.2404	1.40798e-07
1580286	ILMN_1705032	18	18p11.21	SEH1L	SEH1 like nucleoporin	81929	-1.23869	3.42441e-06
5670468	ILMN_1815733	14	14q32.32	EIF5	eukaryotic translation initiation factor 5	1983	-1.23856	1.24632e-05
6220014	ILMN_1724990	3	3p21.31	ELP6	elongator acetyltransferase complex subunit 6	54859	-1.238	4.91081e-06
6660348	ILMN_1801403	4	4q12	DCUN1D4	defective in cullin neddylation 1 domain containing 4	23142	-1.23762	1.41204e-07
6960014	ILMN_1652521	8	8p23.1	MTMR9	myotubularin related protein 9	66036	-1.23746	1.77715e-06
430411	ILMN_1768181	1	1q25.2	TOR3A	torsin family 3 member A	64222	-1.23413	0.000244591
5670397	ILMN_1675542	6	6q22.1	NUS1	NUS1, dehydrodolichyl diphosphate synthase subunit	116150	-1.23334	1.49154e-08
2760102	ILMN_1675483	2	2q37.3	ANKMY1	ankyrin repeat and MYND domain containing 1	51281	-1.23076	4.24702e-06
3870647	ILMN_1665107	2	2p25.1	ITGB1BP1	integrin subunit beta 1 binding protein 1	9270	-1.23042	3.50008e-08
1850468	ILMN_2064898	17	17q21.2	COA3	cytochrome c oxidase assembly factor 3	28958	-1.23027	3.33044e-07
380750	ILMN_1712347	20	20q13.11	SRSF6	serine and arginine rich splicing factor 6	6431	-1.22938	2.32788e-08
1940435	ILMN_2205350	6	6q16.1	NDUFAF4	NADH:ubiquinone oxidoreductase complex assembly factor 4	29078	-1.22833	4.91144e-06
2810678	ILMN_1737124	6	6p25.2	PRPF4B	pre-mRNA processing factor 4B	8899	-1.22745	0.000725791
3060110	ILMN_1697469	20	20q13.11	SRSF6	serine and arginine rich splicing factor 6	6431	-1.22635	7.32538e-09
6760044	ILMN_1691485	5	5q13.2	GTF2H2	general transcription factor IIH subunit 2	2966	-1.22443	2.41263e-05
5560253	ILMN_1701077	21	21q21.3	N6AMT1	N-6 adenine-specific DNA methyltransferase 1	29104	-1.22384	6.76723e-06
1470521	ILMN_1734867	12	12q22	NR2C1	nuclear receptor subfamily 2 group C member 1	7181	-1.2228	2.07086e-06
1410735	ILMN_1675007	19	19q13.43	ZSCAN5A	zinc finger and SCAN domain containing 5A	79149	-1.2222	9.93398e-05
1820768	ILMN_1853876	8	8q21.3	TMEM64	transmembrane protein 64	169200	-1.22205	7.4803e-10
5050093	ILMN_1784630	8	8p23.3	KBTBD11	kelch repeat and BTB domain containing 11	9920	-1.22188	1.14786e-09
4670100	ILMN_1739798	7	7p15.3	MALSU1	mitochondrial assembly of ribosomal large subunit 1	115416	-1.21966	5.87748e-06
540411	ILMN_2311089	17	17q21.31	BRCA1	BRCA1, DNA repair associated	672	-1.21813	1.37234e-06
2510239	ILMN_1666376	7	7q22.1	TRIM56	tripartite motif containing 56	81844	-1.218	3.69554e-05
510100	ILMN_1730879	22	22q13.1	CBY1	chibby family member 1, beta catenin antagonist	25776	-1.21768	1.43726e-07
3460739	ILMN_2052373	2	2q37.3	RAB17	RAB17, member RAS oncogene family	64284	-1.21674	1.93333e-08
3870634	ILMN_2357272	6	6q23.3	BCLAF1	BCL2 associated transcription factor 1	9774	-1.21548	1.5965e-07
7560674	ILMN_1686645	13	13q14.3	UTP14C	UTP14C, small subunit processome component	9724	-1.21531	2.26573e-05
4200170	ILMN_1737847	5	5q35.3	RMND5B	required for meiotic nuclear division 5 homolog B	64777	-1.21519	2.32645e-05
1190075	ILMN_1680386	10	10p13	RPP38	ribonuclease P/MRP subunit p38	10557	-1.21508	5.45501e-07
2340072	ILMN_1718558	7	7q34	PARP12	poly(ADP-ribose) polymerase family member 12	64761	-1.21482	2.57253e-09
6650438	ILMN_1727805	22	22q13.1	SYNGR1	synaptogyrin 1	9145	-1.21391	5.36417e-05
2100402	ILMN_2082489	16	16q22.1	PRMT7	protein arginine methyltransferase 7	54496	-1.21202	2.90271e-06
2600747	ILMN_1739428	10	10q23.31	IFIT2	interferon induced protein with tetratricopeptide repeats 2	3433	-1.21004	3.77195e-06
4490154	ILMN_1703754	18	18p11.21	CEP192	centrosomal protein 192	55125	-1.20937	4.60997e-06
7610138	ILMN_1805344	17	17q23.3	DDX5	DEAD-box helicase 5	1655	-1.20825	2.75797e-08
3450722	ILMN_1735955	2	2q14.1	RPL23AP7	ribosomal protein L23a pseudogene 7	118433	-1.20648	2.91378e-06
6900431	ILMN_1793201	16	16p13.3	HAGHL	hydroxyacylglutathione hydrolase like	84264	-1.20488	3.51291e-06
5550592	ILMN_3300663	NA	NA	NA	NA		-1.2047	3.24074e-06
5700243	ILMN_1691849	11	11p14.1	LIN7C	lin-7 homolog C, crumbs cell polarity complex component	55327	-1.20114	0.0010065
5690750	ILMN_1657475	9	9p13.3	GALT	galactose-1-phosphate uridylyltransferase	2592	-1.20096	1.41455e-07
1510608	ILMN_1865764	3	3q26.32	ZMAT3	zinc finger matrin-type 3	64393	-1.20026	1.84952e-09
7050180	ILMN_1699357	5	5q31.1	SLC22A5	solute carrier family 22 member 5	6584	-1.20013	3.44361e-08
1470259	ILMN_1815012	17	17q25.1	EXOC7	exocyst complex component 7	23265	-1.2	1.45046e-08
2190687	ILMN_1684591	16	16p13.3	ZSCAN32	zinc finger and SCAN domain containing 32	54925	-1.19999	4.3481e-10
6250497	ILMN_2378100	4	4p15.32	FBXL5	F-box and leucine rich repeat protein 5	26234	-1.19997	8.03542e-08
4260253	ILMN_1785852	2	2q32.3	NABP1	nucleic acid binding protein 1	64859	-1.19989	1.51496e-05
3850754	ILMN_2158003	19	19p13.11	IQCN	IQ motif containing N	80726	-1.19906	0.000113504
4210300	ILMN_1692896	1	1q42.13	JMJD4	jumonji domain containing 4	65094	-1.19901	2.94037e-05
3390379	ILMN_3187680	11	11p11.2	ACCS	1-aminocyclopropane-1-carboxylate synthase homolog (inactive)	84680	-1.19887	0.000113096
450608	ILMN_2385191	3	3p21.31	QRICH1	glutamine rich 1	54870	-1.19873	1.67131e-06
7400689	ILMN_1755909	20	20q13.33	GID8	GID complex subunit 8 homolog	54994	-1.1986	3.31343e-08
580465	ILMN_1796216	14	14q24.3	VASH1	vasohibin 1	22846	-1.19844	5.11589e-05
2850082	ILMN_2148150	2	2p16.2	CHAC2	ChaC cation transport regulator homolog 2	494143	-1.19791	9.13641e-06
990735	ILMN_1665877	2	2q11.2	RNF149	ring finger protein 149	284996	-1.19789	1.09215e-10
4010201	ILMN_1688094	7	7q22.1-q22.2	ORC5	origin recognition complex subunit 5	5001	-1.19779	1.36035e-05
4560170	ILMN_1795317	NA	NA	NA	NA		-1.19727	0.000204582
730671	ILMN_2225595	11	11q25	ACAD8	acyl-CoA dehydrogenase family member 8	27034	-1.1972	1.82557e-07
4860437	ILMN_1757627	9	9q34.3	ZMYND19	zinc finger MYND-type containing 19	116225	-1.19576	1.27984e-07
3360131	ILMN_1710752	8	8q24.3	NAPRT	nicotinate phosphoribosyltransferase	93100	-1.19498	4.92313e-07
5960594	ILMN_1700847	2	2q32.2	PMS1	PMS1 homolog 1, mismatch repair system component	5378	-1.19482	0.000792859
50681	ILMN_1797046	16	16q24.1	MTHFSD	methenyltetrahydrofolate synthetase domain containing	64779	-1.19409	7.01852e-06
1260398	ILMN_1750102	17	17q21.33	EME1	essential meiotic structure-specific endonuclease 1	146956	-1.19361	2.96658e-05
2360376	ILMN_1701655	12	12q24.13	SLC8B1	solute carrier family 8 member B1	80024	-1.19357	3.67403e-07
4480224	ILMN_1751072	3	3q22.1	SRPRB	SRP receptor subunit beta	58477	-1.19152	2.39615e-09
5090053	ILMN_1744628	19	19p13.2	FDX2	ferredoxin 2	112812	-1.19085	4.06928e-05
2850273	ILMN_1732725	11	11q13.2	PPP6R3	protein phosphatase 6 regulatory subunit 3	55291	-1.18945	4.79324e-07
7210093	ILMN_1716265	11	11q13.4	PGM2L1	phosphoglucomutase 2 like 1	283209	-1.18937	1.44461e-05
1850309	ILMN_1741459	16	16q24.3	CDK10	cyclin dependent kinase 10	8558	-1.18899	0.00024044
150392	ILMN_1849941	NA	NA	NA	NA		-1.1889	2.94934e-07
2630369	ILMN_1743340	15	15q15.1	CHST14	carbohydrate sulfotransferase 14	113189	-1.18855	3.50053e-06
2850438	ILMN_2329834	20	20q11.22	RBM12	RNA binding motif protein 12	10137	-1.18792	7.7055e-10
1050427	ILMN_3307733	17	17q11.2	TEFM	transcription elongation factor, mitochondrial	79736	-1.18772	3.59972e-08
620092	ILMN_1700380	12	12q24.31	ATP6V0A2	ATPase H+ transporting V0 subunit a2	23545	-1.18701	1.93269e-07
7510356	ILMN_1793017	4	4p16.3	DGKQ	diacylglycerol kinase theta	1609	-1.18626	1.26754e-05
3460307	ILMN_2047599	21	21q22.11	TMEM50B	transmembrane protein 50B	757	-1.18568	5.14922e-10
4760747	ILMN_1651950	7	7q11.21	TPST1	tyrosylprotein sulfotransferase 1	8460	-1.18541	4.49868e-09
6660711	ILMN_1795128	13	13q13.3	PROSER1	proline and serine rich 1	80209	-1.18537	7.62105e-07
380019	ILMN_1696537	4	4q24	DDIT4L	DNA damage inducible transcript 4 like	115265	-1.18529	4.58016e-08
2060603	ILMN_1658909	2	2q32.2	OSGEPL1	O-sialoglycoprotein endopeptidase like 1	64172	-1.18267	4.23523e-06
1070551	ILMN_1690386	NA	NA	NA	NA		-1.18266	1.03319e-07
4200491	ILMN_1709734	14	14q22.2	BMP4	bone morphogenetic protein 4	652	-1.1825	0.000115042
6040079	ILMN_1660222	8	8q24.12	MTBP	MDM2 binding protein	27085	-1.18069	4.34909e-05
5310142	ILMN_2064725	12	12q13.2	METTL7B	methyltransferase like 7B	196410	-1.18038	0.000101646
2190537	ILMN_1809866	11	11q12.3	WDR74	WD repeat domain 74	54663	-1.17905	1.20402e-05
2480156	ILMN_1742923	19	19q13.43	ZNF584	zinc finger protein 584	201514	-1.17882	1.19421e-05
4250398	ILMN_1711383	20	20q13.12	STK4	serine/threonine kinase 4	6789	-1.17868	1.32083e-07
940670	ILMN_1788783	6	6p12.2	TRAM2	translocation associated membrane protein 2	9697	-1.17839	2.81501e-06
7330519	ILMN_1727051	16	16q22.1	DDX19A	DEAD-box helicase 19A	55308	-1.17837	1.87972e-07
2350563	ILMN_1652085	2	2p13.3	MPHOSPH10	M-phase phosphoprotein 10	10199	-1.17777	2.53027e-07
780184	ILMN_2227473	13	13q21.33-q22.1	PIBF1	progesterone immunomodulatory binding factor 1	10464	-1.17746	5.015e-05
520521	ILMN_2189424	1	1p36.33	MRPL20	mitochondrial ribosomal protein L20	55052	-1.17719	2.01418e-05
5810142	ILMN_1787691	1	c("1p34.2", "1p35-p34")	CITED4	Cbp/p300 interacting transactivator with Glu/Asp rich carboxy-terminal domain 4	163732	-1.17709	1.30513e-05
6450162	ILMN_1814106	9	9q34.3	CYSRT1	cysteine rich tail 1	375791	-1.17547	1.99722e-06
7560301	ILMN_1708009	7	7p11.2	LANCL2	LanC like 2	55915	-1.17382	1.18437e-05
2760719	ILMN_3176090	1	1p36.13	RCC2	regulator of chromosome condensation 2	55920	-1.17381	7.20329e-10
5670114	ILMN_2083588	2	2p24.1	TTC32	tetratricopeptide repeat domain 32	130502	-1.17333	5.4062e-08
5090603	ILMN_1701940	9	9q34.11	MIGA2	mitoguardin 2	84895	-1.17329	0.00018792
2030736	ILMN_1687824	16	16p11.2	SEPHS2	selenophosphate synthetase 2	22928	-1.17261	1.10467e-06
5360619	ILMN_2256765	13	13q34	CDC16	cell division cycle 16	8881	-1.17244	9.14083e-09
1230731	ILMN_1682197	4	4p12	NFXL1	nuclear transcription factor, X-box binding like 1	152518	-1.17221	6.91864e-05
6060767	ILMN_1698189	11	11q22.3	AASDHPPT	aminoadipate-semialdehyde dehydrogenase-phosphopantetheinyl transferase	60496	-1.17191	5.8823e-06
4670743	ILMN_2204297	14	14q22.3	AP5M1	adaptor related protein complex 5 subunit mu 1	55745	-1.17081	9.81616e-06
1410113	ILMN_1775405	7	7p21.3	ARL4A	ADP ribosylation factor like GTPase 4A	10124	-1.16954	0.000142209
2630669	ILMN_2383163	11	11p13	DEPDC7	DEP domain containing 7	91614	-1.16919	2.9242e-05
1050440	ILMN_1751744	19	19p13.11	ANKLE1	ankyrin repeat and LEM domain containing 1	126549	-1.16889	2.21901e-07
1510681	ILMN_2155719	1	1q21.1	NBPF10	NBPF member 10	100132406	-1.16829	0.00249865
4850521	ILMN_1701374	2	2q32.1	NUP35	nucleoporin 35	129401	-1.16823	5.69975e-07
3610750	ILMN_1683120	12	12q24.11	UNG	uracil DNA glycosylase	7374	-1.16727	1.22639e-07
6330367	ILMN_1801572	19	19p13.11	C19orf44	chromosome 19 open reading frame 44	84167	-1.16703	3.3761e-06
50553	ILMN_3306742	9	9p13.3	SIGMAR1	sigma non-opioid intracellular receptor 1	10280	-1.1655	2.5861e-05
5560010	ILMN_1660426	7	7q22.1	CPSF4	cleavage and polyadenylation specific factor 4	10898	-1.16514	1.06405e-10
1110039	ILMN_1808500	2	2p14	CEP68	centrosomal protein 68	23177	-1.16496	3.9702e-07
3390021	ILMN_1750674	12	12q24.13	SDSL	serine dehydratase like	113675	-1.16389	5.9713e-07
2140711	ILMN_1755134	5	5q31.1	HSPA4	heat shock protein family A (Hsp70) member 4	3308	-1.1637	1.642e-05
4830373	ILMN_1720114	6	6p22.3	GMNN	geminin, DNA replication inhibitor	51053	-1.16259	8.26752e-06
4810326	ILMN_1655924	3	3p26.2	TRNT1	tRNA nucleotidyl transferase 1	51095	-1.16218	6.85487e-06
2810673	ILMN_1739582	NA	NA	NA	NA		-1.16164	5.06063e-07
3840288	ILMN_2103919	19	19q13.12	LRFN3	leucine rich repeat and fibronectin type III domain containing 3	79414	-1.15982	2.40025e-08
4610239	ILMN_1781526	1	1p35.3	PPP1R8	protein phosphatase 1 regulatory subunit 8	5511	-1.15974	4.10942e-06
4180612	ILMN_1859946	1	1q23.3	UHMK1	U2AF homology motif kinase 1	127933	-1.15909	1.06046e-07
6560468	ILMN_1777118	8	8p21.1	INTS9	integrator complex subunit 9	55756	-1.15831	2.52603e-09
1300768	ILMN_1691143	10	10p12.1	RAB18	RAB18, member RAS oncogene family	22931	-1.15763	4.62668e-05
4860373	ILMN_1660757	20	20q13.11	SRSF6	serine and arginine rich splicing factor 6	6431	-1.15693	2.48097e-05
840528	ILMN_1712708	17	17q25.1	TRIM47	tripartite motif containing 47	91107	-1.15685	3.41396e-07
6330242	ILMN_1677953	16	16q13	OGFOD1	2-oxoglutarate and iron dependent oxygenase domain containing 1	55239	-1.15683	7.34985e-08
7650435	ILMN_1763129	16	16p11.2	DCTPP1	dCTP pyrophosphatase 1	79077	-1.15663	2.59358e-05
1820398	ILMN_1696485	5	5q35.3	HNRNPAB	heterogeneous nuclear ribonucleoprotein A/B	3182	-1.15651	7.61825e-07
730093	ILMN_1789166	19	19p13.3	SHD	Src homology 2 domain containing transforming protein D	56961	-1.15633	0.000345728
2570020	ILMN_1665164	11	11p15.4	CTR9	CTR9 homolog, Paf1/RNA polymerase II complex component	9646	-1.15575	4.30009e-06
4560689	ILMN_1810085	3	3q27.1	ABCF3	ATP binding cassette subfamily F member 3	55324	-1.15515	0.000113915
5670181	ILMN_1710078	6	6q25.3	TMEM181	transmembrane protein 181	57583	-1.15495	2.75666e-08
3850333	ILMN_1666076	2	2q21.1	ARHGEF4	Rho guanine nucleotide exchange factor 4	50649	-1.15421	3.52602e-05
7380088	ILMN_1738239	3	3p21.31	RBM6	RNA binding motif protein 6	10180	-1.15396	5.30059e-09
3060192	ILMN_1754272	16	16q21	GINS3	GINS complex subunit 3	64785	-1.15386	1.04067e-08
2360273	ILMN_1736546	2	2q36.3	SLC16A14	solute carrier family 16 member 14	151473	-1.15379	3.37493e-06
6110739	ILMN_2222984	NA	NA	NA	NA		-1.15351	3.61958e-07
2630224	ILMN_1797181	4	4p16.1	LOC93622	Morf4 family associated protein 1 like 1 pseudogene	93622	-1.15342	1.74201e-07
3310445	ILMN_1676026	20	20p13	MRPS26	mitochondrial ribosomal protein S26	64949	-1.15315	7.96443e-08
6220372	ILMN_1664646	10	10p12.31	NSUN6	NOP2/Sun RNA methyltransferase family member 6	221078	-1.15197	7.52903e-05
650646	ILMN_1776119	6	6p21.1	ABCC10	ATP binding cassette subfamily C member 10	89845	-1.14904	7.48544e-05
6250382	ILMN_1793894	3	3q22.2	ANAPC13	anaphase promoting complex subunit 13	25847	-1.1486	7.80984e-11
3400148	ILMN_1799387	15	15q15.1	INO80	INO80 complex subunit	54617	-1.14702	1.53537e-06
5900047	ILMN_2375032	6	6q21	BEND3	BEN domain containing 3	57673	-1.14693	1.15665e-05
610148	ILMN_1665428	8	8q24.3	GSDMD	gasdermin D	79792	-1.14522	2.61048e-07
2350762	ILMN_1791792	12	12p13.32	TIGAR	TP53 induced glycolysis regulatory phosphatase	57103	-1.14483	1.59621e-05
7610598	ILMN_1740493	1	1q32.3	TRAF5	TNF receptor associated factor 5	7188	-1.14477	9.47399e-05
5820035	ILMN_2049766	7	7p15.2	NFE2L3	nuclear factor, erythroid 2 like 3	9603	-1.14397	5.6465e-06
2750091	ILMN_2053567	2	2q33.3	FASTKD2	FAST kinase domains 2	22868	-1.14371	1.10027e-08
4920148	ILMN_2139970	15	15q26.3	ALDH1A3	aldehyde dehydrogenase 1 family member A3	220	-1.14367	1.43562e-07
1450603	ILMN_1666208	14	14q21.2	MIS18BP1	MIS18 binding protein 1	55320	-1.14316	1.42288e-06
3370669	ILMN_3185784	NA	NA	NA	NA		-1.14235	1.86835e-07
360731	ILMN_3228585	NA	NA	NA	NA		-1.14132	4.48197e-08
1470603	ILMN_1662147	1	1p34.3	MANEAL	mannosidase endo-alpha like	149175	-1.13995	3.88393e-06
4180209	ILMN_1786601	20	20q11.21	PLAGL2	PLAG1 like zinc finger 2	5326	-1.13978	3.66166e-08
6060379	ILMN_1761086	2	2p15-p14	VPS54	VPS54, GARP complex subunit	51542	-1.13959	3.81502e-07
5910440	ILMN_1733094	7	7q21.13	STEAP1	STEAP family member 1	26872	-1.13902	2.84004e-05
7560543	ILMN_2323801	6	6p21.2	MOCS1	molybdenum cofactor synthesis 1	4337	-1.13894	5.14792e-09
4120487	ILMN_3235168	1	1p36.12	MUL1	mitochondrial E3 ubiquitin protein ligase 1	79594	-1.13732	6.80482e-08
1980176	ILMN_1675472	20	20q11.23	NORAD	non-coding RNA activated by DNA damage	647979	-1.13694	9.92687e-08
5860204	ILMN_1787345	12	12q13.12	FKBP11	FK506 binding protein 11	51303	-1.13675	0.0049049
5570286	ILMN_2363165	10	10q26.13	TACC2	transforming acidic coiled-coil containing protein 2	10579	-1.13656	3.85382e-06
4860435	ILMN_1670079	1	1p32.2-p32.1	OMA1	OMA1 zinc metallopeptidase	115209	-1.13639	3.23704e-08
290114	ILMN_1768127	1	1p34.2	EBNA1BP2	EBNA1 binding protein 2	10969	-1.13606	8.91554e-09
2650370	ILMN_1741200	1	1q21.3	RFX5	regulatory factor X5	5993	-1.13599	1.55541e-07
3170561	ILMN_2339796	13	13q34	CDC16	cell division cycle 16	8881	-1.135	7.50849e-09
5290192	ILMN_1726930	5	5q12.3	TRAPPC13	trafficking protein particle complex 13	80006	-1.13486	4.22989e-06
3130128	ILMN_1754727	NA	NA	NA	NA		-1.13401	2.77207e-05
7380427	ILMN_1782993	16	16q22.2	DHODH	dihydroorotate dehydrogenase (quinone)	1723	-1.13366	2.77448e-07
780471	ILMN_1728710	19	19q13.41	ZNF816	zinc finger protein 816	125893	-1.13363	2.76901e-06
110450	ILMN_1695962	7	7q22.1	SLC12A9	solute carrier family 12 member 9	56996	-1.13345	4.58045e-06
7320332	ILMN_1775085	17	17p13.2	ZNF232	zinc finger protein 232	7775	-1.13262	1.7902e-06
2900132	ILMN_1782745	20	20q11.23	RBL1	RB transcriptional corepressor like 1	5933	-1.13228	7.60109e-06
7380368	ILMN_1789775	11	11q12.3	WDR74	WD repeat domain 74	54663	-1.13218	2.02124e-07
5720070	ILMN_1661424	4	4q21.1	THAP6	THAP domain containing 6	152815	-1.13167	1.45821e-08
1190647	ILMN_1655748	6	c("6p22.1", "6p22.3-p22.1")	ZSCAN31	zinc finger and SCAN domain containing 31	64288	-1.12987	8.15775e-06
2600403	ILMN_3247159	9	9p22.1	SCARNA8	small Cajal body-specific RNA 8	677776	-1.12986	0.000483976
2350576	ILMN_2405642	1	1p36.11	DHDDS	dehydrodolichyl diphosphate synthase subunit	79947	-1.12985	2.4842e-06
3180564	ILMN_1678680	3	3q22.3	DBR1	debranching RNA lariats 1	51163	-1.1297	0.000705641
5270139	ILMN_1710000	19	19p13.2	PEX11G	peroxisomal biogenesis factor 11 gamma	92960	-1.12937	1.42315e-06
3830129	ILMN_1692698	1	1q32.3	VASH2	vasohibin 2	79805	-1.12916	2.91244e-05
1050180	ILMN_1772540	16	16q23.2	ATMIN	ATM interactor	23300	-1.12858	6.20412e-07
1190022	ILMN_2372413	22	22q11.21	BID	BH3 interacting domain death agonist	637	-1.1277	3.16752e-06
4570576	ILMN_1882000	X	Xp22.2	TXLNG	taxilin gamma	55787	-1.12741	2.41123e-08
460682	ILMN_1716342	7	7q21.2-q21.3	VPS50	VPS50, EARP/GARPII complex subunit	55610	-1.1269	1.5805e-05
7050056	ILMN_1798804	6	6p21.31	SRPK1	SRSF protein kinase 1	6732	-1.12667	8.79332e-08
1240646	ILMN_1745699	17	17q23.2	METTL2A	methyltransferase like 2A	339175	-1.1263	7.70253e-07
2570139	ILMN_1677532	1	1p36.22	TARDBP	TAR DNA binding protein	23435	-1.12603	0.00143498
5560398	ILMN_1667430	1	1q42.11	DEGS1	delta 4-desaturase, sphingolipid 1	8560	-1.12545	3.66602e-06
2640142	ILMN_1713803	17	17p13.3	C17orf97	chromosome 17 open reading frame 97	400566	-1.12474	3.39889e-05
1660168	ILMN_1751395	19	19p13.2	KRI1	KRI1 homolog	65095	-1.12425	3.0462e-08
430731	ILMN_1724986	3	3q29	WDR53	WD repeat domain 53	348793	-1.12406	1.7446e-07
3170102	ILMN_2161556	12	12q24.22	C12orf49	chromosome 12 open reading frame 49	79794	-1.12222	7.40075e-08
3940215	ILMN_1672884	15	15q22.31	MTFMT	mitochondrial methionyl-tRNA formyltransferase	123263	-1.12205	9.0137e-06
1090300	ILMN_2135232	6	6p21.31-p21.2	SRSF3	serine and arginine rich splicing factor 3	6428	-1.12126	7.18001e-05
3930326	ILMN_1812721	12	12q24.31	HIP1R	huntingtin interacting protein 1 related	9026	-1.12096	1.35078e-06
3140521	ILMN_3247636	15	15q22.31	SCARNA14	small Cajal body-specific RNA 14	692149	-1.1203	0.0028084
7650653	ILMN_2354391	NA	NA	NA	NA		-1.12012	3.49398e-07
450521	ILMN_1751171	19	19q13.32	IRF2BP1	interferon regulatory factor 2 binding protein 1	26145	-1.12009	3.4839e-05
7040243	ILMN_2373982	22	22q13.1	PICK1	protein interacting with PRKCA 1	9463	-1.11973	1.86836e-07
3440181	ILMN_1775423	10	10q26.13	C10orf88	chromosome 10 open reading frame 88	80007	-1.11964	0.000251004
2470035	ILMN_2132161	11	11p14.1	KIF18A	kinesin family member 18A	81930	-1.1196	6.12513e-06
6620379	ILMN_1690523	10	10q22.1	LRRC20	leucine rich repeat containing 20	55222	-1.11949	1.39889e-07
1070189	ILMN_1724480	17	17q24.1	AXIN2	axin 2	8313	-1.11515	0.00115509
5310717	ILMN_1724753	14	14q22.1	NIN	ninein	51199	-1.11483	3.22763e-08
6650202	ILMN_1744299	6	c("6p12.3", "6")	ADGRF1	adhesion G protein-coupled receptor F1	266977	-1.11447	1.5821e-07
4850091	ILMN_1797074	12	12p13.31	EMG1	EMG1, N1-specific pseudouridine methyltransferase	10436	-1.11401	1.87474e-06
2690402	ILMN_1706344	3	3p14.3	ABHD6	abhydrolase domain containing 6	57406	-1.11347	1.93589e-06
2030646	ILMN_3237446	17	17q25.2	SCARNA16	small Cajal body-specific RNA 16	677781	-1.11344	0.000233481
7560367	ILMN_1674551	5	5q31.1	SMAD5	SMAD family member 5	4090	-1.11333	1.85373e-07
4290687	ILMN_3237632	19	19p13.3	NCLN	nicalin	56926	-1.11206	1.10508e-07
6940348	ILMN_1761939	15	15q22.31	TIPIN	TIMELESS interacting protein	54962	-1.11105	3.57017e-09
7570022	ILMN_1741881	9	9p21.2	C9orf72	chromosome 9 open reading frame 72	203228	-1.11091	8.14196e-05
6020368	ILMN_1744316	1	1q32.3	TATDN3	TatD DNase domain containing 3	128387	-1.1109	2.60155e-07
1070152	ILMN_1767523	3	3p21.1	IL17RB	interleukin 17 receptor B	55540	-1.11077	3.99655e-07
3780152	ILMN_1872457	NA	NA	NA	NA		-1.11072	1.20106e-06
6840241	ILMN_1737084	1	1p35.2	TXLNA	taxilin alpha	200081	-1.10993	3.63103e-08
6760674	ILMN_3263702	16	16q24.3	VPS9D1-AS1	VPS9D1 antisense RNA 1	100128881	-1.10837	2.86594e-06
3290576	ILMN_1771697	19	19q13.33	VRK3	VRK serine/threonine kinase 3	51231	-1.10775	1.21234e-06
5270491	ILMN_1798346	18	18q21.33	RELCH	RAB11 binding and LisH domain, coiled-coil and HEAT repeat containing	57614	-1.10754	1.72723e-05
4570131	ILMN_1657868	12	12q24.23-q24.31	SIRT4	sirtuin 4	23409	-1.10712	2.02951e-05
4390446	ILMN_1759991	22	22q13.1	NOL12	nucleolar protein 12	79159	-1.10688	2.64043e-07
1470092	ILMN_1799389	8	8q24.3	FBXL6	F-box and leucine rich repeat protein 6	26233	-1.10606	1.28724e-05
940129	ILMN_2385278	14	14q24.2	DCAF4	DDB1 and CUL4 associated factor 4	26094	-1.1057	2.73589e-07
3450458	ILMN_1754126	1	1p36.12	SH2D5	SH2 domain containing 5	400745	-1.1055	4.87071e-06
5820768	ILMN_1767509	16	16q24.3	DEF8	differentially expressed in FDCP 8 homolog	54849	-1.1055	8.91628e-07
2140671	ILMN_1698307	7	7p13	DBNL	drebrin like	28988	-1.10544	7.67186e-07
2750598	ILMN_1712298	8	8q22.3	ANKRD46	ankyrin repeat domain 46	157567	-1.10468	5.69966e-05
870400	ILMN_2342240	14	14q21.3	MGAT2	mannosyl (alpha-1,6-)-glycoprotein beta-1,2-N-acetylglucosaminyltransferase	4247	-1.10425	1.85999e-06
110132	ILMN_2234310	1	1p36.33	CPTP	ceramide-1-phosphate transfer protein	80772	-1.10406	2.05571e-06
6580370	ILMN_1780699	16	16q22.1	THAP11	THAP domain containing 11	57215	-1.10396	2.31189e-05
3850521	ILMN_1813800	13	13q14.12	NUFIP1	nuclear FMR1 interacting protein 1	26747	-1.10376	6.00119e-06
5130102	ILMN_1776153	5	5q13.3	AGGF1	angiogenic factor with G-patch and FHA domains 1	55109	-1.10343	2.39867e-06
1510703	ILMN_1718972	8	8q24.3	MFSD3	major facilitator superfamily domain containing 3	113655	-1.10333	3.64193e-06
5080164	ILMN_1707484	2	2p22.1	GEMIN6	gem nuclear organelle associated protein 6	79833	-1.10268	8.19074e-08
3310161	ILMN_2183216	6	6p22.3	TDP2	tyrosyl-DNA phosphodiesterase 2	51567	-1.10257	0.000577216
6620356	ILMN_2059505	15	15q21.2	ARPP19	cAMP regulated phosphoprotein 19	10776	-1.1023	2.89822e-06
630446	ILMN_1789405	22	22q11.21	TANGO2	transport and golgi organization 2 homolog	128989	-1.10172	3.68718e-05
4180468	ILMN_1694466	c("X", "Y")	c("Xp22.33", "Yp11.2")	ZBED1	zinc finger BED-type containing 1	9189	-1.10153	1.86415e-06
2120097	ILMN_1669842	19	19p13.3	CHAF1A	chromatin assembly factor 1 subunit A	10036	-1.10137	1.34011e-05
4150484	ILMN_1675577	14	14q32.33	TRMT61A	tRNA methyltransferase 61A	115708	-1.1002	5.52624e-07
1980044	ILMN_3244096	12	12q21.1	ZFC3H1	zinc finger C3H1-type containing	196441	-1.10009	3.53218e-06
1780563	ILMN_1714622	16	16p12.1	TNRC6A	trinucleotide repeat containing 6A	27327	-1.09959	2.65324e-07
1400358	ILMN_3253579	19	19p13.11	HAUS8	HAUS augmin like complex subunit 8	93323	-1.09948	3.86764e-06
1110154	ILMN_1777644	22	22q12.2	INPP5J	inositol polyphosphate-5-phosphatase J	27124	-1.09898	5.85419e-06
4830291	ILMN_2089458	1	1p21.2	SASS6	SAS-6 centriolar assembly protein	163786	-1.0984	1.43406e-06
3520072	ILMN_1730391	6	6p21.1	MRPS18A	mitochondrial ribosomal protein S18A	55168	-1.09813	4.83808e-06
2600647	ILMN_1797209	7	7q32.2	CEP41	centrosomal protein 41	95681	-1.09753	2.87452e-06
6220368	ILMN_1756669	1	1q24.1	POGK	pogo transposable element derived with KRAB domain	57645	-1.09713	1.6029e-08
670554	ILMN_1742166	19	19q13.33	GRWD1	glutamate rich WD repeat containing 1	83743	-1.09672	1.86984e-05
4010131	ILMN_1744147	2	2p22.2	CEBPZ	CCAAT enhancer binding protein zeta	10153	-1.09642	1.35461e-08
3800088	ILMN_2192072	11	11q22.2	MMP7	matrix metallopeptidase 7	4316	-1.09522	4.90263e-08
5670296	ILMN_1806946	17	17q21.31	UBTF	upstream binding transcription factor	7343	-1.09516	0.000661768
2750209	ILMN_1782751	8	8q24.3	GLI4	GLI family zinc finger 4	2738	-1.09497	0.000149093
6270201	ILMN_2400250	16	16p13.3	EEF2KMT	eukaryotic elongation factor 2 lysine methyltransferase	196483	-1.09485	0.000157456
520528	ILMN_1695357	5	5q35.1	SPDL1	spindle apparatus coiled-coil protein 1	54908	-1.09463	1.0053e-06
6590520	ILMN_2186858	14	14q32.31	ZNF839	zinc finger protein 839	55778	-1.09457	6.37571e-06
6980750	ILMN_2357577	5	5p13.1	PRKAA1	protein kinase AMP-activated catalytic subunit alpha 1	5562	-1.09338	5.32299e-07
3840370	ILMN_1741180	17	17q25.3	HEXD	hexosaminidase D	284004	-1.09085	1.91912e-05
1850176	ILMN_1726704	1	1p36.21	RSC1A1	regulator of solute carriers 1	6248	-1.09078	8.24747e-07
1690053	ILMN_1695829	17	17q25.1	TTYH2	tweety family member 2	94015	-1.09076	1.41419e-06
4050768	ILMN_1734707	3	3q21.3	CHST13	carbohydrate sulfotransferase 13	166012	-1.09006	5.01082e-06
2690670	ILMN_1652594	20	20q11.23	ACTR5	ARP5 actin related protein 5 homolog	79913	-1.08884	0.000220768
2690279	ILMN_1679984	X	Xq24	ZCCHC12	zinc finger CCHC-type containing 12	170261	-1.08873	8.7621e-08
4730634	ILMN_1758938	9	9q32	SLC31A2	solute carrier family 31 member 2	1318	-1.08737	1.49698e-05
2260280	ILMN_1764617	17	17q21.31	GPATCH8	G-patch domain containing 8	23131	-1.08729	0.00026845
3310181	ILMN_1665117	6	6p21.2	C6orf89	chromosome 6 open reading frame 89	221477	-1.08727	3.19022e-06
2120452	ILMN_1795342	2	2q37.3	MLPH	melanophilin	79083	-1.08672	7.81591e-09
3060433	ILMN_1807501	8	8p11.21	GINS4	GINS complex subunit 4	84296	-1.08665	5.15904e-05
2060528	ILMN_1661399	7	7p21.3	ARL4A	ADP ribosylation factor like GTPase 4A	10124	-1.08636	7.71385e-05
5220632	ILMN_1780058	1	1q42.11	DEGS1	delta 4-desaturase, sphingolipid 1	8560	-1.08627	9.85324e-08
5340450	ILMN_1769390	17	17q11.2	ABHD15	abhydrolase domain containing 15	116236	-1.08598	8.83992e-05
7610189	ILMN_1702384	8	8q22.3	ZNF706	zinc finger protein 706	51123	-1.08595	1.79203e-06
1780437	ILMN_2401701	10	10q24.33	PCGF6	polycomb group ring finger 6	84108	-1.08586	2.13713e-05
2470296	ILMN_1809566	6	6p22.1	ZSCAN16	zinc finger and SCAN domain containing 16	80345	-1.08487	2.32095e-05
430520	ILMN_1691333	19	19p13.3	ZNF57	zinc finger protein 57	126295	-1.08426	1.33561e-05
730228	ILMN_1729816	8	8p11.21	VDAC3	voltage dependent anion channel 3	7419	-1.08362	4.70411e-09
130735	ILMN_2156786	5	5q22.3	PGGT1B	protein geranylgeranyltransferase type I subunit beta	5229	-1.08296	3.11266e-06
6590463	ILMN_1762436	17	17p11.2	UBB	ubiquitin B	7314	-1.08113	7.22822e-08
7610050	ILMN_1651964	3	3q27.1	ABCC5	ATP binding cassette subfamily C member 5	10057	-1.08103	5.10429e-08
1710286	ILMN_1665538	5	5p13.2	SKP2	S-phase kinase associated protein 2	6502	-1.08059	2.03368e-07
3450681	ILMN_1716862	2	2p21	PPM1B	protein phosphatase, Mg2+/Mn2+ dependent 1B	5495	-1.08029	1.50616e-07
5700273	ILMN_3236423	1	1q41	RAB3GAP2	RAB3 GTPase activating non-catalytic protein subunit 2	25782	-1.08019	8.4742e-06
4810075	ILMN_1709659	11	11q13.2	TMEM151A	transmembrane protein 151A	256472	-1.08017	4.25236e-05
670079	ILMN_1697682	17	17q25.1	RECQL5	RecQ like helicase 5	9400	-1.07938	5.95555e-05
4280300	ILMN_1795822	15	15q22.31	DIS3L	DIS3 like exosome 3'-5' exoribonuclease	115752	-1.07928	6.53888e-09
6860102	ILMN_1670821	Y	Yq11.222-q11.223	TXLNGY	taxilin gamma pseudogene, Y-linked	246126	-1.07926	1.00628e-07
5420025	ILMN_1752027	12	12q24.11	UBE3B	ubiquitin protein ligase E3B	89910	-1.07905	1.99058e-09
5050162	ILMN_1780582	6	6p23	CD83	CD83 molecule	9308	-1.079	7.9051e-07
1940288	ILMN_1775677	10	10q22.1	TYSND1	trypsin domain containing 1	219743	-1.07864	4.47478e-08
7330563	ILMN_3233135	10	10q24.31	SLF2	SMC5-SMC6 complex localization factor 2	55719	-1.07864	5.62757e-06
7040682	ILMN_1837428	18	18q21.2	RAB27B	RAB27B, member RAS oncogene family	5874	-1.07854	0.000291853
5570615	ILMN_1814573	16	16q22.2	CMTR2	cap methyltransferase 2	55783	-1.0771	0.000259075
1940180	ILMN_2376108	6	6p21.32	PSMB9	proteasome subunit beta 9	5698	-1.07616	5.95164e-06
5900133	ILMN_1709936	5	5q23.3-q31.1	LYRM7	LYR motif containing 7	90624	-1.07422	9.96722e-07
4040189	ILMN_1742382	1	1p34.2	RIMS3	regulating synaptic membrane exocytosis 3	9783	-1.07369	0.000276881
7100546	ILMN_1682368	7	7q22.1	LRWD1	leucine rich repeats and WD repeat domain containing 1	222229	-1.07342	4.24565e-08
2480241	ILMN_1659801	8	8q22.3	ATP6V1C1	ATPase H+ transporting V1 subunit C1	528	-1.07249	2.47801e-05
4200367	ILMN_1690454	3	3p21.31	INKA1	inka box actin regulator 1	389119	-1.07211	0.000305885
5900468	ILMN_1764396	2	2q37.3	HDAC4	histone deacetylase 4	9759	-1.07198	0.000881164
6420736	ILMN_2311020	10	10q21.3	DNAJC12	DnaJ heat shock protein family (Hsp40) member C12	56521	-1.07121	1.11265e-05
7330326	ILMN_3244963	1	1q23.2	DCAF8	DDB1 and CUL4 associated factor 8	50717	-1.0712	2.66285e-06
6110646	ILMN_3237679	9	9q21.12	PTAR1	protein prenyltransferase alpha subunit repeat containing 1	375743	-1.07115	3.43302e-06
5860626	ILMN_2405915	15	15q25.3	MRPS11	mitochondrial ribosomal protein S11	64963	-1.07101	3.91568e-06
1940068	ILMN_2338268	7	7q11.23	ABHD11	abhydrolase domain containing 11	83451	-1.07088	1.16322e-05
2690707	ILMN_1799819	12	12q13.3	MARS	methionyl-tRNA synthetase	4141	-1.06888	1.367e-06
1090196	ILMN_3246206	14	14q31.1	SNORA79	small nucleolar RNA, H/ACA box 79	677845	-1.06868	0.00116433
5670458	ILMN_1750167	6	6p21.33	PRR3	proline rich 3	80742	-1.06862	3.74976e-06
2320730	ILMN_2367113	4	4q25	CASP6	caspase 6	839	-1.06844	2.39889e-05
520463	ILMN_1795298	7	7p22.3	GPER1	G protein-coupled estrogen receptor 1	2852	-1.06841	0.000133216
110711	ILMN_1741171	8	8p11.22	TM2D2	TM2 domain containing 2	83877	-1.0683	1.46786e-05
6520682	ILMN_1753716	12	12q24.31	EIF2B1	eukaryotic translation initiation factor 2B subunit alpha	1967	-1.06818	2.64526e-07
5050181	ILMN_2334204	X	Xq13.1	ERCC6L	ERCC excision repair 6 like, spindle assembly checkpoint helicase	54821	-1.06814	1.04425e-05
1580538	ILMN_1818617	NA	NA	NA	NA		-1.06635	0.000927378
6370736	ILMN_1755419	X	Xp22.12	EIF1AX	eukaryotic translation initiation factor 1A X-linked	1964	-1.06543	0.000311877
5360671	ILMN_3240092	11	11q21	MED17	mediator complex subunit 17	9440	-1.06526	3.05538e-05
5820608	ILMN_2087575	19	19q13.32	ZC3H4	zinc finger CCCH-type containing 4	23211	-1.06411	4.66357e-06
150139	ILMN_2366490	8	8q22.3	ZNF706	zinc finger protein 706	51123	-1.06398	0.00012768
5560576	ILMN_1703140	15	15q21.3	NEDD4	neural precursor cell expressed, developmentally down-regulated 4, E3 ubiquitin protein ligase	4734	-1.06395	0.000834665
580196	ILMN_1708619	18	18p11.21	SEH1L	SEH1 like nucleoporin	81929	-1.06362	7.75112e-07
5290538	ILMN_1660986	1	1p36.23	PER3	period circadian regulator 3	8863	-1.06336	5.16787e-07
3940762	ILMN_1862217	15	15q22.2	APH1B	aph-1 homolog B, gamma-secretase subunit	83464	-1.06273	3.89688e-05
7330347	ILMN_1721563	2	2q11.2	TMEM127	transmembrane protein 127	55654	-1.06263	2.88742e-05
6660544	ILMN_1777591	10	10q24.2	HOGA1	4-hydroxy-2-oxoglutarate aldolase 1	112817	-1.06212	4.82004e-07
4900753	ILMN_1667857	12	12q24.13	RITA1	RBPJ interacting and tubulin associated 1	84934	-1.06102	3.02138e-09
5050112	ILMN_1761411	10	10q26.11	MCMBP	minichromosome maintenance complex binding protein	79892	-1.06069	0.000149324
4860286	ILMN_2191428	17	17p11.2	UBB	ubiquitin B	7314	-1.06045	8.85318e-10
3400070	ILMN_2137066	8	8q24.3	ZNF7	zinc finger protein 7	7553	-1.06023	1.131e-05
6380112	ILMN_1723706	22	22q13.31	GRAMD4	GRAM domain containing 4	23151	-1.05972	6.96259e-06
6350437	ILMN_1691290	3	3p21.31	CELSR3	cadherin EGF LAG seven-pass G-type receptor 3	1951	-1.05939	0.000390299
7570343	ILMN_1726693	11	11p15.1	GTF2H1	general transcription factor IIH subunit 1	2965	-1.05732	0.000329076
3370280	ILMN_1679995	7	7p15.3	MPP6	membrane palmitoylated protein 6	51678	-1.05639	3.62892e-05
4070397	ILMN_1813027	5	5q35.3	TRIM41	tripartite motif containing 41	90933	-1.0562	0.00023448
270156	ILMN_1793651	12	12q22	UBE2N	ubiquitin conjugating enzyme E2 N	7334	-1.05577	1.26652e-07
1190167	ILMN_1716468	3	3q22.1	NUDT16P1	nudix hydrolase 16 pseudogene 1	152195	-1.05566	3.36264e-05
6290678	ILMN_1709800	7	7q11.23	POMZP3	POM121 and ZP3 fusion	22932	-1.05532	1.04025e-05
7040162	ILMN_1776147	21	21q22.11	CFAP298	cilia and flagella associated protein 298	56683	-1.0551	4.52057e-06
4180554	ILMN_3265237	NA	NA	NA	NA		-1.05507	0.0456588
4060280	ILMN_1765085	20	20p12.3	TRMT6	tRNA methyltransferase 6	51605	-1.05498	0.00165675
7380152	ILMN_1749521	12	12q15	SLC35E3	solute carrier family 35 member E3	55508	-1.05446	0.000574486
6370594	ILMN_1802628	9	9p24.1	PLPP6	phospholipid phosphatase 6	403313	-1.05445	1.33058e-05
5870392	ILMN_3275615	7	7q36.3	MNX1-AS1	MNX1 antisense RNA 1 (head to head)	645249	-1.05406	8.60136e-06
5310379	ILMN_1712035	3	3p21.31	TMEM115	transmembrane protein 115	11070	-1.05263	8.91135e-10
7000379	ILMN_1704876	4	4q31.21	USP38	ubiquitin specific peptidase 38	84640	-1.05203	1.70865e-07
2450681	ILMN_3229552	5	5q33.3	MED7	mediator complex subunit 7	9443	-1.0509	2.9154e-07
3940274	ILMN_3229033	NA	NA	NA	NA		-1.05022	0.00713653
4290497	ILMN_3311190	12	12q24.22	LINC00173	long intergenic non-protein coding RNA 173	100287569	-1.05003	1.04669e-07
510554	ILMN_1796912	13	13q34	ARHGEF7	Rho guanine nucleotide exchange factor 7	8874	-1.04997	1.26857e-07
2070184	ILMN_2227968	16	16p13.3	NTHL1	nth like DNA glycosylase 1	4913	-1.04937	7.08699e-09
510255	ILMN_1770030	7	7q22.1	C7orf43	chromosome 7 open reading frame 43	55262	-1.04928	3.23615e-05
1440343	ILMN_1748926	7	7q32.2	TMEM209	transmembrane protein 209	84928	-1.04837	4.4938e-09
6860291	ILMN_1783798	16	16q24.3	GAS8	growth arrest specific 8	2622	-1.04786	0.00033075
2760437	ILMN_1750785	1	1p36.11	SYTL1	synaptotagmin like 1	84958	-1.04719	0.000237815
4070180	ILMN_1784985	3	3p25.3	PRRT3	proline rich transmembrane protein 3	285368	-1.04696	4.75301e-07
7050017	ILMN_3216794	7	7p21.3	ARL4A	ADP ribosylation factor like GTPase 4A	10124	-1.04693	0.00041697
6980435	ILMN_2139351	17	17p13.2	ZNF232	zinc finger protein 232	7775	-1.04589	4.57716e-06
2810390	ILMN_1782098	7	7q32.1	SMO	smoothened, frizzled class receptor	6608	-1.04574	0.000287807
4070239	ILMN_1794707	11	11p15.5	PGGHG	protein-glucosylgalactosylhydroxylysine glucosidase	80162	-1.04545	0.00588692
6370553	ILMN_1664265	7	7q34-q35	EPHA1	EPH receptor A1	2041	-1.04495	3.24555e-08
6350240	ILMN_2086238	17	17p13.3	SMYD4	SET and MYND domain containing 4	114826	-1.04472	1.20381e-05
4780519	ILMN_1761479	7	7q32.2	ZC3HC1	zinc finger C3HC-type containing 1	51530	-1.04461	8.25482e-10
7650097	ILMN_1674811	12	12q24.31	OASL	2'-5'-oligoadenylate synthetase like	8638	-1.04379	4.07494e-06
1170347	ILMN_1768176	X	Xq13.3	PBDC1	polysaccharide biosynthesis domain containing 1	51260	-1.0435	5.03324e-06
5690487	ILMN_3306173	5	5q33.3	MED7	mediator complex subunit 7	9443	-1.04281	5.23057e-07
4760482	ILMN_1667405	9	9p13.3	ARHGEF39	Rho guanine nucleotide exchange factor 39	84904	-1.04274	9.90035e-05
2710025	ILMN_1697472	15	15q26.3	TM2D3	TM2 domain containing 3	80213	-1.04085	0.000233051
1470753	ILMN_1760303	5	5q13.1	PIK3R1	phosphoinositide-3-kinase regulatory subunit 1	5295	-1.04081	6.0399e-06
2970762	ILMN_1707236	X	Xp22.2	HCCS	holocytochrome c synthase	3052	-1.03859	4.70225e-08
5700523	ILMN_1708906	2	2q11.2	CNOT11	CCR4-NOT transcription complex subunit 11	55571	-1.03819	1.72973e-09
5050735	ILMN_1745807	15	15q15.2	TMEM62	transmembrane protein 62	80021	-1.03773	4.71724e-07
5690274	ILMN_1798654	2	2q21.3	MCM6	minichromosome maintenance complex component 6	4175	-1.03624	8.86298e-08
5900129	ILMN_2299072	17	17q21.33	LUC7L3	LUC7 like 3 pre-mRNA splicing factor	51747	-1.03604	0.00124668
270047	ILMN_1795454	12	12q15	CPSF6	cleavage and polyadenylation specific factor 6	11052	-1.03559	2.52943e-06
5490593	ILMN_1799280	3	3q29	BDH1	3-hydroxybutyrate dehydrogenase 1	622	-1.03492	2.993e-05
7040220	ILMN_1705469	NA	NA	NA	NA		-1.03399	3.35046e-06
650709	ILMN_1786039	12	12q24.31	RNF34	ring finger protein 34	80196	-1.03362	5.76865e-07
5290307	ILMN_2168992	6	6q24.3	FBXO30	F-box protein 30	84085	-1.03356	1.13656e-05
4200035	ILMN_1680378	2	2q31.2	RBM45	RNA binding motif protein 45	129831	-1.03344	2.08488e-06
4210286	ILMN_1772296	17	17p13.1	CTC1	CST telomere replication complex component 1	80169	-1.0325	2.39354e-06
2360551	ILMN_1807439	15	15q26.3	ALDH1A3	aldehyde dehydrogenase 1 family member A3	220	-1.03239	2.66158e-06
4560528	ILMN_1687864	12	12q24.31	POP5	POP5 homolog, ribonuclease P/MRP subunit	51367	-1.02984	4.34255e-07
6280674	ILMN_1768020	19	19p13.11	HAUS8	HAUS augmin like complex subunit 8	93323	-1.02965	5.82901e-06
4010167	ILMN_1692116	1	1p35.1	ZBTB8OS	zinc finger and BTB domain containing 8 opposite strand	339487	-1.02945	0.00279624
6420630	ILMN_1723358	8	8p21.1	SCARA3	scavenger receptor class A member 3	51435	-1.02934	4.17888e-05
2260521	ILMN_2193498	1	1q25.3	TRMT1L	tRNA methyltransferase 1 like	81627	-1.02928	8.00195e-07
5340053	ILMN_2222651	9	9q21.33	NAA35	N(alpha)-acetyltransferase 35, NatC auxiliary subunit	60560	-1.02898	0.000211409
6400722	ILMN_3181420	22	22q12.3	HMGXB4	HMG-box containing 4	10042	-1.02859	4.50861e-09
1240064	ILMN_1683127	1	1q32.1	ZNF281	zinc finger protein 281	23528	-1.02856	0.000536621
4120427	ILMN_3249216	13	13q12.2	PDX1	pancreatic and duodenal homeobox 1	3651	-1.02837	9.2683e-05
2100161	ILMN_1735453	2	2p22.3	FAM98A	family with sequence similarity 98 member A	25940	-1.0283	5.42033e-06
3130358	ILMN_1898124	7	7p13	SNHG15	small nucleolar RNA host gene 15	285958	-1.0281	6.90755e-08
2640114	ILMN_1726359	12	12p13.31	NECAP1	NECAP endocytosis associated 1	25977	-1.028	6.64712e-07
1500661	ILMN_1658607	1	1p31.3	DLEU2L	deleted in lymphocytic leukemia 2-like	79469	-1.0277	4.42542e-07
6770204	ILMN_2340877	11	11q13.1	MEN1	menin 1	4221	-1.02741	8.16281e-07
1170154	ILMN_1786215	7	7q22.1	ZNF3	zinc finger protein 3	7551	-1.02702	2.58895e-06
1010544	ILMN_3263329	4	4q25	GAR1	GAR1 ribonucleoprotein	54433	-1.02567	9.53112e-07
4920537	ILMN_1696713	11	11q13.1	POLA2	DNA polymerase alpha 2, accessory subunit	23649	-1.02527	4.37987e-07
2940754	ILMN_2120965	11	11q22.3	NPAT	nuclear protein, coactivator of histone transcription	4863	-1.02409	0.00169962
2320537	ILMN_1686985	X	Xq28	MTM1	myotubularin 1	4534	-1.02339	7.32789e-05
6420368	ILMN_1722156	6	6q14.1	RWDD2A	RWD domain containing 2A	112611	-1.0214	6.6328e-07
2690400	ILMN_1804851	7	7p11.2	MRPS17	mitochondrial ribosomal protein S17	51373	-1.02073	2.09765e-06
5080524	ILMN_1768969	1	1q42.12	LBR	lamin B receptor	3930	-1.02028	1.47588e-06
2640437	ILMN_2356574	2	2p23.3	GTF3C2	general transcription factor IIIC subunit 2	2976	-1.0202	4.20038e-06
3180445	ILMN_1686082	14	14q32.33	CLBA1	clathrin binding box of aftiphilin containing 1	122616	-1.01991	3.631e-05
3120307	ILMN_2362545	10	10q21.1	ZWINT	ZW10 interacting kinetochore protein	11130	-1.0197	2.46506e-06
3940309	ILMN_1659727	15	15q15.2	CDAN1	codanin 1	146059	-1.01926	1.32823e-05
520484	ILMN_1665557	12	12q14.1	USP15	ubiquitin specific peptidase 15	9958	-1.01906	1.42899e-05
6520014	ILMN_1810181	10	10q24.33	PCGF6	polycomb group ring finger 6	84108	-1.01903	5.61414e-05
20546	ILMN_1723042	7	7q11.23	CLDN3	claudin 3	1365	-1.01864	0.000669444
1740685	ILMN_1713178	3	3p14.3	DENND6A	DENN domain containing 6A	201627	-1.01834	1.09458e-05
6220113	ILMN_1718152	11	11p13	DEPDC7	DEP domain containing 7	91614	-1.01665	0.000185004
6370164	ILMN_1752591	8	8p12	LEPROTL1	leptin receptor overlapping transcript like 1	23484	-1.01646	4.22523e-07
4780647	ILMN_2299612	2	2p11.2	TMEM150A	transmembrane protein 150A	129303	-1.01638	5.13157e-05
3870670	ILMN_2229170	5	5q33.3	MED7	mediator complex subunit 7	9443	-1.01595	0.000575421
1500477	ILMN_1713486	2	2q35	RNF25	ring finger protein 25	64320	-1.01491	0.00108722
6290707	ILMN_1793888	18	18q21.33	SERPINB5	serpin family B member 5	5268	-1.01438	9.34653e-07
7610390	ILMN_2114422	7	7p14.3	NOD1	nucleotide binding oligomerization domain containing 1	10392	-1.01416	6.89919e-05
4200608	ILMN_1681135	20	20q13.13	SPATA2	spermatogenesis associated 2	9825	-1.01408	5.02012e-05
6770541	ILMN_1804953	1	1p22.1	CCDC18	coiled-coil domain containing 18	343099	-1.01405	0.0003764
6040192	ILMN_3234226	13	13q13.1	N4BP2L2	NEDD4 binding protein 2 like 2	10443	-1.01387	0.000450804
10253	ILMN_1715616	14	14q21.3	LRR1	leucine rich repeat protein 1	122769	-1.01371	6.58366e-06
7380347	ILMN_1715540	3	3p21.31	TRAIP	TRAF interacting protein	10293	-1.01323	9.57457e-05
1580397	ILMN_2136635	14	14q24.3	ISCA2	iron-sulfur cluster assembly 2	122961	-1.01253	1.60692e-06
5900441	ILMN_1657624	20	20p13	NSFL1C	NSFL1 cofactor	55968	-1.01216	4.73904e-07
1510564	ILMN_2123402	12	12q13.3	CNPY2	canopy FGF signaling regulator 2	10330	-1.01202	7.6842e-06
3460634	ILMN_1689972	3	3p21.2	RRP9	ribosomal RNA processing 9, U3 small nucleolar RNA binding protein	9136	-1.01198	0.000208303
6590279	ILMN_1792947	8	8p21.1	ESCO2	establishment of sister chromatid cohesion N-acetyltransferase 2	157570	-1.01095	7.11929e-05
6900025	ILMN_1792672	2	2q14.3	POLR2D	RNA polymerase II subunit D	5433	-1.01072	4.30258e-06
6520408	ILMN_2343624	1	1q24.3	EEF1AKNMT	eEF1A lysine and N-terminal methyltransferase	51603	-1.01056	1.97725e-07
3400605	ILMN_1750967	6	6p22.1	ZKSCAN3	zinc finger with KRAB and SCAN domains 3	80317	-1.0102	5.10955e-05
4560632	ILMN_2228035	4	4p15.33	HS3ST1	heparan sulfate-glucosamine 3-sulfotransferase 1	9957	-1.01017	6.84238e-09
6580689	ILMN_1684873	X	Xp22.33	ARSD	arylsulfatase D	414	-1.0101	1.35564e-05
5690156	ILMN_1696375	2	2p13.1	TTC31	tetratricopeptide repeat domain 31	64427	-1.00962	1.07714e-06
5550026	ILMN_1673024	3	3p21.2	RBM15B	RNA binding motif protein 15B	29890	-1.00962	3.03806e-06
7050189	ILMN_1769545	11	11q12.2	PRPF19	pre-mRNA processing factor 19	27339	-1.00924	6.64019e-05
2140368	ILMN_1772798	15	15q21.2	ARPP19	cAMP regulated phosphoprotein 19	10776	-1.00889	0.000216118
6590224	ILMN_1759023	4	4p16.1	WFS1	wolframin ER transmembrane glycoprotein	7466	-1.00791	3.28851e-06
2850349	ILMN_1730329	11	11q21	MED17	mediator complex subunit 17	9440	-1.00731	0.000194868
6620475	ILMN_2061452	2	2q33.1	ORC2	origin recognition complex subunit 2	4999	-1.00661	8.6703e-07
5870326	ILMN_1724609	9	9q33.3	SLC2A8	solute carrier family 2 member 8	29988	-1.00581	1.03537e-06
1440037	ILMN_1763386	22	22q11.21	BID	BH3 interacting domain death agonist	637	-1.00576	7.40944e-05
5270239	ILMN_1749253	17	17q23.1	TUBD1	tubulin delta 1	51174	-1.00465	0.00105087
1240309	ILMN_1762312	11	11q24.2	FOXRED1	FAD dependent oxidoreductase domain containing 1	55572	-1.00402	7.4364e-06
4150079	ILMN_1783889	5	5p13.1	PRKAA1	protein kinase AMP-activated catalytic subunit alpha 1	5562	-1.00354	1.81222e-07
6130747	ILMN_1768449	17	17q25.1	PRPSAP1	phosphoribosyl pyrophosphate synthetase associated protein 1	5635	-1.00336	3.38163e-09
3420180	ILMN_1792990	11	11q24.1	ZNF202	zinc finger protein 202	7753	-1.00298	3.43372e-06
7040286	ILMN_1705247	10	10q25.2	ACSL5	acyl-CoA synthetase long chain family member 5	51703	-1.00276	2.30233e-07
4850703	ILMN_2227385	2	2q36.3	SLC16A14	solute carrier family 16 member 14	151473	-1.00256	2.68016e-07
7040553	ILMN_1803997	9	9q34.3	ENTR1	endosome associated trafficking regulator 1	10807	-1.00224	1.37034e-07
650626	ILMN_1658290	16	16p13.2	METTL22	methyltransferase like 22	79091	-1.00219	2.17231e-07
1940228	ILMN_1770623	X	Xq28	CCNQ	cyclin Q	92002	-1.00219	3.79851e-07
4880521	ILMN_1727389	13	13q34	CDC16	cell division cycle 16	8881	-1.00205	1.65934e-06
770424	ILMN_2209578	10	10q11.23	AGAP6	ArfGAP with GTPase domain, ankyrin repeat and PH domain 6	414189	-1.002	0.0068949
290086	ILMN_1805161	22	c("22q11.21", "22q11.1-q11.2")	LZTR1	leucine zipper like transcription regulator 1	8216	-1.00178	3.89264e-05
5310152	ILMN_1676846	4	4q31.21	ABCE1	ATP binding cassette subfamily E member 1	6059	-1.00134	3.9093e-07
6290452	ILMN_1688071	8	8p22	NAT1	N-acetyltransferase 1	9	-1.00103	6.98698e-06
780427	ILMN_1738750	12	12q13.12-q13.13	TFCP2	transcription factor CP2	7024	-1.00065	1.43104e-08
2490730	ILMN_1811560	19	19p13.11	SUGP1	SURP and G-patch domain containing 1	57794	-1.00045	1.18722e-06
5810437	ILMN_1724009	16	16q21	SETD6	SET domain containing 6	79918	-1.00042	9.55623e-06
670470	ILMN_2159322	10	10q24.33-q25.1	SLK	STE20 like kinase	9748	-0.999551	4.06832e-06
6020719	ILMN_2346997	6	6p12.1-p11.2	RAB23	RAB23, member RAS oncogene family	51715	-0.997268	4.29729e-07
5700717	ILMN_1724148	12	12q24.31	ORAI1	ORAI calcium release-activated calcium modulator 1	84876	-0.996866	0.000728299
2140382	ILMN_1754858	2	2q37.3	PASK	PAS domain containing serine/threonine kinase	23178	-0.996399	3.30624e-05
360445	ILMN_2407482	20	20p13	ITPA	inosine triphosphatase	3704	-0.996304	0.000182124
3370703	ILMN_2160929	11	11q12.2	FEN1	flap structure-specific endonuclease 1	2237	-0.995753	3.10749e-08
6580685	ILMN_2413899	10	10p13	MCM10	minichromosome maintenance 10 replication initiation factor	55388	-0.995231	0.00209766
6550671	ILMN_1760682	NA	NA	NA	NA		-0.994995	7.81977e-07
5570048	ILMN_1700549	8	8p11.23	ERLIN2	ER lipid raft associated 2	11160	-0.994482	1.38467e-05
4390162	ILMN_1655733	7	7q11.23	RFC2	replication factor C subunit 2	5982	-0.993821	4.28303e-05
510136	ILMN_1717925	9	9p13.3	SIGMAR1	sigma non-opioid intracellular receptor 1	10280	-0.993445	0.000984623
4200731	ILMN_1787081	17	17q12	TADA2A	transcriptional adaptor 2A	6871	-0.993391	0.000468145
4260204	ILMN_2396148	12	12q24.31	HIP1R	huntingtin interacting protein 1 related	9026	-0.992099	0.00367008
7150154	ILMN_1707240	1	1p21.3	PTBP2	polypyrimidine tract binding protein 2	58155	-0.991465	0.000866826
6110477	ILMN_2097546	1	1p36.11	NUDC	nuclear distribution C, dynein complex regulator	10726	-0.99137	1.07567e-08
6840040	ILMN_1740216	2	2q14.3	ERCC3	ERCC excision repair 3, TFIIH core complex helicase subunit	2071	-0.991166	4.32223e-08
5390025	ILMN_1746025	3	3q11.2	RIOX2	ribosomal oxygenase 2	84864	-0.99097	8.81812e-06
4480192	ILMN_2349138	1	1q21.3	CDC42SE1	CDC42 small effector 1	56882	-0.990672	6.01307e-06
450100	ILMN_3230608	NA	NA	NA	NA		-0.99029	0.0139777
4280681	ILMN_3260345	2	2q36.3	AGFG1	ArfGAP with FG repeats 1	3267	-0.99	2.05802e-05
6560767	ILMN_1750401	17	17q25.3	CYBC1	cytochrome b-245 chaperone 1	79415	-0.989829	5.50036e-06
2690528	ILMN_1811933	17	17p11.2	SHMT1	serine hydroxymethyltransferase 1	6470	-0.989518	7.83069e-09
6770719	ILMN_1738816	13	13q14.11	FOXO1	forkhead box O1	2308	-0.989406	2.88977e-05
7000669	ILMN_1653161	10	10q23.2	SNCG	synuclein gamma	6623	-0.989403	0.0071313
1990292	ILMN_2407811	17	17p13.1	NEURL4	neuralized E3 ubiquitin protein ligase 4	84461	-0.989309	0.000381621
5080037	ILMN_1709870	1	1p36.31	HES2	hes family bHLH transcription factor 2	54626	-0.989196	5.13069e-05
4810358	ILMN_2061405	4	4q21.1	NUP54	nucleoporin 54	53371	-0.98871	1.62836e-07
2190553	ILMN_1659297	8	8q22.3	FZD6	frizzled class receptor 6	8323	-0.988568	1.06959e-05
4180176	ILMN_1748034	16	16q24.2	KLHDC4	kelch domain containing 4	54758	-0.988245	4.95553e-07
270736	ILMN_1755737	22	22q13.33	TRABD	TraB domain containing	80305	-0.988179	9.71339e-07
160561	ILMN_1718610	16	16p12.1	ARHGAP17	Rho GTPase activating protein 17	55114	-0.987701	2.14186e-06
6560441	ILMN_1790807	3	3p25.1	XPC	XPC complex subunit, DNA damage recognition and repair factor	7508	-0.987618	2.78412e-08
1400408	ILMN_1768773	NA	NA	NA	NA		-0.987536	0.00044884
3870484	ILMN_1714159	1	1p36.12	LUZP1	leucine zipper protein 1	7798	-0.987283	1.5238e-06
7000240	ILMN_1696757	3	3q26.33	TTC14	tetratricopeptide repeat domain 14	151613	-0.987251	0.00135949
2490068	ILMN_1699254	14	14q24.1	PLEKHH1	pleckstrin homology, MyTH4 and FERM domain containing H1	57475	-0.986777	0.000223232
2970475	ILMN_1813833	16	16p13.3	CIAO3	cytosolic iron-sulfur assembly component 3	64428	-0.986775	0.000744076
110161	ILMN_1664776	8	8q24.22	EFR3A	EFR3 homolog A	23167	-0.986071	1.22459e-06
1510661	ILMN_1726783	2	2p25.3	RNASEH1	ribonuclease H1	246243	-0.985654	0.00142409
6560338	ILMN_1730824	2	2p23.3	ZNF512	zinc finger protein 512	84450	-0.985547	1.18418e-05
2070315	ILMN_1740923	20	20p13	SLC52A3	solute carrier family 52 member 3	113278	-0.984687	1.88668e-05
6980747	ILMN_1739210	1	1q32.3	NSL1	NSL1, MIS12 kinetochore complex component	25936	-0.984181	1.49567e-06
730541	ILMN_1788024	13	13q34	PCID2	PCI domain containing 2	55795	-0.984036	5.41784e-07
5310390	ILMN_1764165	17	17q25.1	TRIM65	tripartite motif containing 65	201292	-0.982586	0.00142003
6020398	ILMN_1724207	15	15q15.1	IVD	isovaleryl-CoA dehydrogenase	3712	-0.982464	0.00288416
2680553	ILMN_2367681	8	8q22.2	SPAG1	sperm associated antigen 1	6674	-0.982037	6.38788e-05
4570615	ILMN_2361643	X	Xp11.21	RRAGB	Ras related GTP binding B	10325	-0.981225	1.32405e-05
1300719	ILMN_2053281	14	14q23.1	L3HYPDH	trans-L-3-hydroxyproline dehydratase	112849	-0.980778	6.57682e-05
2760768	ILMN_1726786	22	22q13.1	TNRC6B	trinucleotide repeat containing 6B	23112	-0.980376	5.13341e-06
7000167	ILMN_1684108	5	5p15.33	IRX4	iroquois homeobox 4	50805	-0.980317	6.92261e-05
5490253	ILMN_2347917	11	11q14.2	EED	embryonic ectoderm development	8726	-0.980304	7.98282e-07
7050136	ILMN_1786976	20	20q13.32	RAB22A	RAB22A, member RAS oncogene family	57403	-0.979715	6.04507e-08
4490612	ILMN_3180557	1	1p13.3	CYB561D1	cytochrome b561 family member D1	284613	-0.979207	0.000172591
5340332	ILMN_1749612	11	11p13	IMMP1L	inner mitochondrial membrane peptidase subunit 1	196294	-0.979205	3.71865e-05
5270296	ILMN_2067708	1	1q44	TFB2M	transcription factor B2, mitochondrial	64216	-0.979097	7.36691e-05
5220132	ILMN_1680239	4	4q22.1	NUDT9	nudix hydrolase 9	53343	-0.978947	4.39298e-07
5080561	ILMN_2074258	2	2q35	BARD1	BRCA1 associated RING domain 1	580	-0.978805	0.00394834
7510259	ILMN_1722056	13	13q14.3	ATP7B	ATPase copper transporting beta	540	-0.9784	6.38412e-07
1450707	ILMN_1666399	6	6p21.32	RING1	ring finger protein 1	6015	-0.978046	3.95533e-08
4760520	ILMN_2103720	8	8q11.23	MRPL15	mitochondrial ribosomal protein L15	29088	-0.977647	1.24338e-05
1260347	ILMN_2094938	1	1p32.2-p32.1	OMA1	OMA1 zinc metallopeptidase	115209	-0.977189	0.000217625
4730577	ILMN_1659350	4	4q25	CASP6	caspase 6	839	-0.976982	4.62389e-05
2630553	ILMN_1722583	16	16q24.1	EMC8	ER membrane protein complex subunit 8	10328	-0.976943	6.29899e-09
6520577	ILMN_2285618	21	21q22.3	DIP2A	disco interacting protein 2 homolog A	23181	-0.976851	0.00148775
580154	ILMN_1698912	16	16q22.1	PDF	peptide deformylase, mitochondrial	64146	-0.976807	5.0312e-05
3120400	ILMN_1716089	19	19p13.2	KANK2	KN motif and ankyrin repeat domains 2	25959	-0.976569	6.17048e-08
7650468	ILMN_1758679	7	7q31.1	TMEM168	transmembrane protein 168	64418	-0.976474	0.000129386
4900270	ILMN_1729144	8	8q23.2	EBAG9	estrogen receptor binding site associated, antigen, 9	9166	-0.975678	0.00336624
2600739	ILMN_1805828	14	14q32.2	VRK1	VRK serine/threonine kinase 1	7443	-0.975614	3.8517e-06
5960672	ILMN_1797425	12	12q24.31	DDX55	DEAD-box helicase 55	57696	-0.974139	1.0205e-06
7570228	ILMN_3204734	7	7q22.1	STAG3L5P-PVRIG2P-PILRB	STAG3L5P-PVRIG2P-PILRB readthrough	101752399	-0.974072	0.000679813
4920458	ILMN_1711171	1	1q21.3	CREB3L4	cAMP responsive element binding protein 3 like 4	148327	-0.974053	1.86586e-05
2630400	ILMN_1807515	10	10q21.1	CSTF2T	cleavage stimulation factor subunit 2 tau variant	23283	-0.973792	6.14484e-05
7510424	ILMN_2229922	12	12p11.21	KIAA1551	KIAA1551	55196	-0.973715	7.86365e-06
110240	ILMN_1792671	12	12q21.32	C12orf29	chromosome 12 open reading frame 29	91298	-0.973357	1.41446e-05
2600204	ILMN_1765019	3	3p21.31	SACM1L	SAC1 like phosphatidylinositide phosphatase	22908	-0.972842	5.6321e-06
2490066	ILMN_1796244	16	16p11.2	CD2BP2	CD2 cytoplasmic tail binding protein 2	10421	-0.972603	2.15892e-08
5570142	ILMN_3185161	9	9q21.2	CEP78	centrosomal protein 78	84131	-0.971922	1.36005e-06
2470450	ILMN_1880052	NA	NA	NA	NA		-0.971492	3.69996e-07
2070523	ILMN_1784651	22	22q13.2	NAGA	alpha-N-acetylgalactosaminidase	4668	-0.971466	0.000317412
670647	ILMN_2299045	4	4q21.21	BMP2K	BMP2 inducible kinase	55589	-0.971065	2.40494e-07
3140181	ILMN_2391789	14	14q32.11	TDP1	tyrosyl-DNA phosphodiesterase 1	55775	-0.970675	8.40987e-05
6020564	ILMN_1783709	9	9p22.1	RRAGA	Ras related GTP binding A	10670	-0.970627	1.09342e-08
2680543	ILMN_1782922	1	1p31.3	PDE4B	phosphodiesterase 4B	5142	-0.970443	1.12436e-06
7550678	ILMN_1714805	14	14q31.3	ZC3H14	zinc finger CCCH-type containing 14	79882	-0.970441	0.000800943
2690484	ILMN_1789879	2	2p24.1	WDR35	WD repeat domain 35	57539	-0.970146	0.000187109
6520538	ILMN_3253126	13	13q34	GAS6-AS1	GAS6 antisense RNA 1	650669	-0.970121	0.000234675
1850136	ILMN_1738420	1	1p36.22	TMEM201	transmembrane protein 201	199953	-0.968502	4.82894e-06
2140364	ILMN_1799890	3	3p25.1	RBSN	rabenosyn, RAB effector	64145	-0.968194	1.7267e-05
4490133	ILMN_1772702	11	11q21	SRSF8	serine and arginine rich splicing factor 8	10929	-0.967552	3.93418e-05
1660170	ILMN_1753279	5	5q31.2	HNRNPA0	heterogeneous nuclear ribonucleoprotein A0	10949	-0.967282	4.48937e-09
6400097	ILMN_1675055	1	1p36.12	MUL1	mitochondrial E3 ubiquitin protein ligase 1	79594	-0.967045	3.98683e-06
1770187	ILMN_2226304	4	4q28.1	ANKRD50	ankyrin repeat domain 50	57182	-0.966151	3.40951e-06
6900079	ILMN_1694177	20	20p12.3	PCNA	proliferating cell nuclear antigen	5111	-0.966032	3.77494e-07
3170538	ILMN_3248343	15	15q15.1	INO80	INO80 complex subunit	54617	-0.96579	4.84319e-07
6520010	ILMN_2184708	11	11p14.1	LIN7C	lin-7 homolog C, crumbs cell polarity complex component	55327	-0.965711	0.000131148
3370288	ILMN_1691930	22	22q13.1	CBX6	chromobox 6	23466	-0.965207	1.28782e-06
3780435	ILMN_1793220	21	21q22.11	GART	phosphoribosylglycinamide formyltransferase, phosphoribosylglycinamide synthetase, phosphoribosylaminoimidazole synthetase	2618	-0.964561	0.000257482
160204	ILMN_1810423	6	6p25.1	RPP40	ribonuclease P/MRP subunit p40	10799	-0.964528	1.02965e-07
6290292	ILMN_1678805	14	14q24.3	POMT2	protein O-mannosyltransferase 2	29954	-0.963958	8.40523e-05
4290259	ILMN_1799579	3	3p21.31	CCDC51	coiled-coil domain containing 51	79714	-0.962215	1.37159e-05
450408	ILMN_1747903	1	1p36.31	DNAJC11	DnaJ heat shock protein family (Hsp40) member C11	55735	-0.959898	1.65089e-05
4570102	ILMN_2398432	11	11q13.2	BRMS1	BRMS1, transcriptional repressor and anoikis regulator	25855	-0.959477	2.3485e-09
1340047	ILMN_3245476	11	11p15.5	PHRF1	PHD and ring finger domains 1	57661	-0.959339	3.1657e-06
7000390	ILMN_1751474	1	1p22.1	ARHGAP29	Rho GTPase activating protein 29	9411	-0.959316	0.000271027
5720059	ILMN_1778240	6	6p23	GFOD1	glucose-fructose oxidoreductase domain containing 1	54438	-0.959269	0.00027313
4230301	ILMN_1836744	16	16p13.3	PGP	phosphoglycolate phosphatase	283871	-0.959162	0.000112086
4490735	ILMN_1795704	4	4p16.1	KIAA0232	KIAA0232	9778	-0.959143	1.94501e-05
1410204	ILMN_1721963	11	11q13.1	MEN1	menin 1	4221	-0.958802	0.00040401
6520669	ILMN_1706005	9	9p13.3	GALT	galactose-1-phosphate uridylyltransferase	2592	-0.958466	7.91744e-05
2680754	ILMN_1687359	17	17q22	MRPS23	mitochondrial ribosomal protein S23	51649	-0.958105	3.88002e-05
1470017	ILMN_1807206	14	14q12	DHRS1	dehydrogenase/reductase 1	115817	-0.9579	2.2744e-06
20301	ILMN_3251303	3	3p25.1	NR2C2	nuclear receptor subfamily 2 group C member 2	7182	-0.957301	8.54237e-05
3420523	ILMN_1691717	17	17q25.1	RHBDF2	rhomboid 5 homolog 2	79651	-0.957218	1.06033e-06
1440639	ILMN_3238712	16	16p13.3	SNRNP25	small nuclear ribonucleoprotein U11/U12 subunit 25	79622	-0.956864	4.52689e-05
4200356	ILMN_1743673	11	11q13.2	FAM86C2P	family with sequence similarity 86, member A pseudogene	645332	-0.956495	5.2131e-06
1090477	ILMN_1815718	10	10q24.32	BTRC	beta-transducin repeat containing E3 ubiquitin protein ligase	8945	-0.956291	3.6948e-05
4590424	ILMN_1706149	19	19q13.11	PDCD2L	programmed cell death 2 like	84306	-0.956149	4.25451e-07
2100093	ILMN_1764364	1	1p13.2	FAM19A3	family with sequence similarity 19 member A3, C-C motif chemokine like	284467	-0.955506	2.83301e-05
2320253	ILMN_1773313	NA	NA	NA	NA		-0.955359	0.000169137
6580730	ILMN_3215374	5	5q11.2	LOC257396	uncharacterized LOC257396	257396	-0.954523	9.13054e-06
6580168	ILMN_1660544	15	15q26.2	ARRDC4	arrestin domain containing 4	91947	-0.954335	4.79043e-06
1090577	ILMN_2149566	17	17q21.2	VPS25	vacuolar protein sorting 25 homolog	84313	-0.953071	0.00024326
3610139	ILMN_1668134	1	1p13.3	GSTM1	glutathione S-transferase mu 1	2944	-0.95271	6.28392e-05
6370494	ILMN_2356672	2	2p23.3	EIF2B4	eukaryotic translation initiation factor 2B subunit delta	8890	-0.952554	2.5743e-07
270593	ILMN_2384056	7	7p22.3	GPER1	G protein-coupled estrogen receptor 1	2852	-0.952463	7.18904e-06
3850187	ILMN_1688639	3	3p22.3	FBXL2	F-box and leucine rich repeat protein 2	25827	-0.952101	2.48964e-06
2360243	ILMN_2341952	2	2p11.2	MRPL35	mitochondrial ribosomal protein L35	51318	-0.951873	1.87e-07
2940546	ILMN_2122176	12	12q14.3	LLPH	LLP homolog, long-term synaptic facilitation factor	84298	-0.951721	2.9648e-05
4610767	ILMN_1703226	1	1p32.3	KTI12	KTI12 chromatin associated homolog	112970	-0.951526	0.000103749
5260059	ILMN_2198185	X	Xq28	TMEM187	transmembrane protein 187	8269	-0.951084	5.99936e-06
510471	ILMN_1762615	10	10q26.13	ABRAXAS2	abraxas 2, BRISC complex subunit	23172	-0.95094	1.46744e-08
4780735	ILMN_1755215	6	6q24.3	SAMD5	sterile alpha motif domain containing 5	389432	-0.950749	8.28849e-05
7560538	ILMN_1752283	20	20q11.22	ITCH	itchy E3 ubiquitin protein ligase	83737	-0.950443	4.29586e-05
1580129	ILMN_1813389	17	17q25.1	MRPS7	mitochondrial ribosomal protein S7	51081	-0.950293	2.49268e-06
2810491	ILMN_1730005	6	6p22.1	TRIM27	tripartite motif containing 27	5987	-0.949982	9.52959e-05
5390288	ILMN_2401730	X	Xq24	C1GALT1C1	C1GALT1 specific chaperone 1	29071	-0.949695	0.00056099
1070692	ILMN_1682323	12	12q24.33	DDX51	DEAD-box helicase 51	317781	-0.949665	0.000148464
3190066	ILMN_1769250	11	11p11.2	ARFGAP2	ADP ribosylation factor GTPase activating protein 2	84364	-0.949373	3.31623e-07
2970754	ILMN_2365528	19	19p13.11	HAUS8	HAUS augmin like complex subunit 8	93323	-0.949345	7.33525e-06
270133	ILMN_1784207	1	1p36.11	PITHD1	PITH domain containing 1	57095	-0.949091	1.70128e-07
4200008	ILMN_1756006	11	11q13.1	ATG2A	autophagy related 2A	23130	-0.948777	3.33731e-05
6110338	ILMN_2060145	8	8q22.3	GRHL2	grainyhead like transcription factor 2	79977	-0.948234	2.88966e-07
6560328	ILMN_1705116	6	6p25.2	SLC22A23	solute carrier family 22 member 23	63027	-0.947207	0.000134974
2370128	ILMN_1793743	3	3q21.1	DIRC2	disrupted in renal carcinoma 2	84925	-0.947184	3.30193e-06
2140070	ILMN_1725246	16	16q22.1	COG8	component of oligomeric golgi complex 8	84342	-0.947122	0.000648067
730465	ILMN_1662161	9	9q34.11	TBC1D13	TBC1 domain family member 13	54662	-0.94683	2.73604e-05
3190437	ILMN_1811102	9	9q33.3-q34.11	LRSAM1	leucine rich repeat and sterile alpha motif containing 1	90678	-0.946461	8.32703e-06
1430347	ILMN_1812559	16	16q22.1	SLC7A6	solute carrier family 7 member 6	9057	-0.946456	9.5113e-06
240288	ILMN_1733356	NA	NA	NA	NA		-0.946298	4.56607e-06
5700561	ILMN_1690329	11	11q24.2	FAM118B	family with sequence similarity 118 member B	79607	-0.94626	3.27088e-05
2100224	ILMN_1815264	22	22q12.2	RHBDD3	rhomboid domain containing 3	25807	-0.945512	0.000133785
6560131	ILMN_2225608	6	6q13	FAM135A	family with sequence similarity 135 member A	57579	-0.945293	4.90025e-05
830082	ILMN_1794659	19	19q13.33	FUT2	fucosyltransferase 2	2524	-0.945285	5.59358e-05
5310615	ILMN_1667670	13	13q14.11	SLC25A15	solute carrier family 25 member 15	10166	-0.945229	6.77603e-07
6980377	ILMN_2152178	15	15q13.3	FAN1	FANCD2 and FANCI associated nuclease 1	22909	-0.945108	0.000109076
4860673	ILMN_1747303	19	19p13.12	DDX39A	DExD-box helicase 39A	10212	-0.944139	3.69388e-09
430717	ILMN_1789342	1	1q23.3	NDUFS2	NADH:ubiquinone oxidoreductase core subunit S2	4720	-0.943825	4.02755e-06
5910138	ILMN_2324998	14	14q11.2	NGDN	neuroguidin	25983	-0.943765	1.78588e-07
6180056	ILMN_1724333	9	9q34.11	TOR1B	torsin family 1 member B	27348	-0.943656	1.96211e-06
3780689	ILMN_1779014	6	6q22.1	TSPYL1	TSPY like 1	7259	-0.942645	4.02736e-06
5390543	ILMN_1656413	1	1p34.2	ZMPSTE24	zinc metallopeptidase STE24	10269	-0.942383	1.20117e-05
5130750	ILMN_1762712	10	10q23.33	HHEX	hematopoietically expressed homeobox	3087	-0.941419	2.62578e-05
160026	ILMN_1717180	13	13q12.13	MTMR6	myotubularin related protein 6	9107	-0.941356	0.000575295
1170095	ILMN_1724734	20	20q11.22	UQCC1	ubiquinol-cytochrome c reductase complex assembly factor 1	55245	-0.941338	7.79359e-06
5080451	ILMN_1759952	1	1p13.3	PSMA5	proteasome subunit alpha 5	5686	-0.940836	2.75905e-08
2060577	ILMN_1754476	6	6p22.1	TRIM15	tripartite motif containing 15	89870	-0.940691	0.00256099
1070376	ILMN_1740385	11	11q23.3	CEP164	centrosomal protein 164	22897	-0.939469	0.000137085
4920189	ILMN_1716006	18	18q21.2	C18orf54	chromosome 18 open reading frame 54	162681	-0.939248	3.691e-07
6590674	ILMN_1726752	9	9p21.1	APTX	aprataxin	54840	-0.938789	1.34346e-07
1010386	ILMN_2403006	15	15q13.1	TJP1	tight junction protein 1	7082	-0.938498	4.39984e-07
3890048	ILMN_1678362	15	15q15.1	INO80	INO80 complex subunit	54617	-0.938209	2.60625e-06
3360445	ILMN_2349006	1	1q23.3	USP21	ubiquitin specific peptidase 21	27005	-0.937819	2.2787e-08
3940053	ILMN_2335669	14	14q31.3	ZC3H14	zinc finger CCCH-type containing 14	79882	-0.937712	2.21568e-07
1030278	ILMN_1684497	10	10q24.2	PYROXD2	pyridine nucleotide-disulphide oxidoreductase domain 2	84795	-0.937031	0.0007874
2360537	ILMN_1690473	19	19q13.2	NFKBIB	NFKB inhibitor beta	4793	-0.936931	0.000196022
4210692	ILMN_1776674	11	11q13.1	SAC3D1	SAC3 domain containing 1	29901	-0.936799	3.33837e-06
7400102	ILMN_2167426	22	22q12.1	ASPHD2	aspartate beta-hydroxylase domain containing 2	57168	-0.936635	0.000118874
1090543	ILMN_2330267	4	4q31.21	ABCE1	ATP binding cassette subfamily E member 1	6059	-0.936418	3.53691e-07
6940397	ILMN_1741219	X	Xp11.21	RRAGB	Ras related GTP binding B	10325	-0.935729	0.000124798
240110	ILMN_1719622	17	17p13.2	RABEP1	rabaptin, RAB GTPase binding effector protein 1	9135	-0.935711	3.85766e-07
3390053	ILMN_1804571	6	6p22.1	ZKSCAN4	zinc finger with KRAB and SCAN domains 4	387032	-0.935654	1.79747e-06
6520215	ILMN_2184184	9	9q21.13	ANXA1	annexin A1	301	-0.935567	1.01912e-06
5560136	ILMN_2086222	10	10q26.12	WDR11	WD repeat domain 11	55717	-0.935319	0.000592258
2510546	ILMN_1704785	10	10q26.3	FUOM	fucose mutarotase	282969	-0.935244	3.22704e-06
6960315	ILMN_1809010	11	11p11.2	PSMC3	proteasome 26S subunit, ATPase 3	5702	-0.93442	1.80262e-06
2190564	ILMN_3245907	8	8p21.3	FAM160B2	family with sequence similarity 160 member B2	64760	-0.934273	0.000389398
3780441	ILMN_2179778	3	3q13.2	PHLDB2	pleckstrin homology like domain family B member 2	90102	-0.933627	0.00022833
4260142	ILMN_2192683	12	12q24.31	DHX37	DEAH-box helicase 37	57647	-0.933438	1.96312e-05
610475	ILMN_1664440	15	15q15.3	TP53BP1	tumor protein p53 binding protein 1	7158	-0.933373	1.17565e-05
3450274	ILMN_2353431	10	10p15.1	ANKRD16	ankyrin repeat domain 16	54522	-0.932794	2.87675e-06
650307	ILMN_3176989	19	19p13.11	HAUS8	HAUS augmin like complex subunit 8	93323	-0.932531	0.000243339
7100681	ILMN_1743506	17	17q25.3	CCDC137	coiled-coil domain containing 137	339230	-0.932331	0.0065746
1010543	ILMN_1665060	2	2p23.3	CCDC121	coiled-coil domain containing 121	79635	-0.932232	8.39374e-06
2070735	ILMN_1667315	NA	NA	NA	NA		-0.931986	0.000351012
6020661	ILMN_1745497	12	12q21.31	METTL25	methyltransferase like 25	84190	-0.931981	5.26897e-05
5960736	ILMN_2176251	20	20p11.23	MGME1	mitochondrial genome maintenance exonuclease 1	92667	-0.931757	8.22224e-09
6480609	ILMN_1812973	21	21q22.3	RRP1B	ribosomal RNA processing 1B	23076	-0.930929	2.10476e-06
5910170	ILMN_1806463	7	7q35	CTAGE6	CTAGE family member 6	340307	-0.930508	0.000115733
3370424	ILMN_2334205	X	Xq13.1	ERCC6L	ERCC excision repair 6 like, spindle assembly checkpoint helicase	54821	-0.930305	2.55514e-05
5900474	ILMN_1695334	1	1q21.3	PYGO2	pygopus family PHD finger 2	90780	-0.92978	0.00473949
5390259	ILMN_1760982	6	6p22.1	ZSCAN26	zinc finger and SCAN domain containing 26	7741	-0.929606	9.73175e-06
2360167	ILMN_1778255	19	19p13.13	FARSA	phenylalanyl-tRNA synthetase subunit alpha	2193	-0.929586	0.000231488
4290075	ILMN_2062754	5	5q31.3	SRA1	steroid receptor RNA activator 1	10011	-0.929394	0.000143275
6420309	ILMN_2387952	5	5p15.1	RETREG1	reticulophagy regulator 1	54463	-0.929113	7.70318e-05
5290050	ILMN_1804568	5	5q14.1	HOMER1	homer scaffold protein 1	9456	-0.928479	0.000155123
7040307	ILMN_1745152	20	20q11.22	UQCC1	ubiquinol-cytochrome c reductase complex assembly factor 1	55245	-0.927562	9.49425e-08
2120445	ILMN_1679800	5	5p13.2	BRIX1	BRX1, biogenesis of ribosomes	55299	-0.927527	9.09182e-09
6760091	ILMN_1809543	11	11p14.1	BDNF	brain derived neurotrophic factor	627	-0.9268	0.000555638
3870402	ILMN_3244029	12	12q13.3	ANKRD52	ankyrin repeat domain 52	283373	-0.926633	0.000172918
5820500	ILMN_1790202	1	1q42.13	C1orf35	chromosome 1 open reading frame 35	79169	-0.926442	2.15766e-07
270343	ILMN_1754531	15	15q21.2	AP4E1	adaptor related protein complex 4 subunit epsilon 1	23431	-0.926341	2.04594e-07
1410279	ILMN_2296950	22	22q13.1	APOBEC3F	apolipoprotein B mRNA editing enzyme catalytic subunit 3F	200316	-0.926301	0.000286145
4230554	ILMN_1749009	11	11q23.2	REXO2	RNA exonuclease 2	25996	-0.926029	2.01621e-06
4220327	ILMN_1719656	17	17q25.1	MRPL38	mitochondrial ribosomal protein L38	64978	-0.925331	1.78202e-06
3140743	ILMN_2315780	10	10q26.13	TACC2	transforming acidic coiled-coil containing protein 2	10579	-0.925011	5.40139e-10
1780161	ILMN_2343105	2	2q11.2	LIPT1	lipoyltransferase 1	51601	-0.924687	1.36074e-06
5720192	ILMN_2043452	6	6p21.31	FANCE	FA complementation group E	2178	-0.924544	1.57584e-06
3930047	ILMN_1667417	6	6p12.1-p11.2	RAB23	RAB23, member RAS oncogene family	51715	-0.923974	2.46848e-05
4120278	ILMN_1811472	15	15q23	KIF23	kinesin family member 23	9493	-0.923867	3.33344e-06
7040132	ILMN_1661833	18	18p11.22	ANKRD12	ankyrin repeat domain 12	23253	-0.923461	1.79677e-05
6940307	ILMN_3306168	NA	NA	NA	NA		-0.922906	9.01565e-07
4010243	ILMN_1689665	16	16q22.1	NAE1	NEDD8 activating enzyme E1 subunit 1	8883	-0.922032	7.37954e-09
4010414	ILMN_1679460	12	12p11.23-p11.22	PPFIBP1	PPFIA binding protein 1	8496	-0.921629	3.76901e-05
430192	ILMN_1703324	10	10p12.1	PDSS1	decaprenyl diphosphate synthase subunit 1	23590	-0.921605	8.83049e-06
6580301	ILMN_2230998	16	16p13.2	TMEM186	transmembrane protein 186	25880	-0.921266	6.02065e-05
4060523	ILMN_2046024	2	2p13.1	DUSP11	dual specificity phosphatase 11	8446	-0.921259	1.66124e-05
7200356	ILMN_1743499	17	17q11.2	POLDIP2	DNA polymerase delta interacting protein 2	26073	-0.920753	1.37312e-05
4060021	ILMN_1700834	10	10q24.33-q25.1	SLK	STE20 like kinase	9748	-0.920751	9.7085e-05
2060338	ILMN_2135709	8	8q22.2	ERICH5	glutamate rich 5	203111	-0.920751	0.000462071
7210059	ILMN_1757336	3	3q29	LRCH3	leucine rich repeats and calponin homology domain containing 3	84859	-0.920182	0.00108886
6940201	ILMN_1771835	4	4q21.1	NUP54	nucleoporin 54	53371	-0.919759	1.00674e-05
4670603	ILMN_2317730	20	20q13.12	ELMO2	engulfment and cell motility 2	63916	-0.91969	3.21853e-08
4570224	ILMN_1776490	17	17q21.31	C17orf53	chromosome 17 open reading frame 53	78995	-0.919407	7.73108e-06
1770609	ILMN_1705908	6	6p21.1	RPL7L1	ribosomal protein L7 like 1	285855	-0.919373	1.06687e-05
1500112	ILMN_1662174	17	17q21.1	ORMDL3	ORMDL sphingolipid biosynthesis regulator 3	94103	-0.919175	0.000229161
290132	ILMN_1693004	20	20q11.23	SOGA1	suppressor of glucose, autophagy associated 1	140710	-0.919021	0.000594931
380152	ILMN_1687884	2	2q11.1	ZNF2	zinc finger protein 2	7549	-0.918614	1.47932e-05
6250538	ILMN_1689932	9	9q34.3	DPH7	diphthamide biosynthesis 7	92715	-0.917664	0.00894232
5910326	ILMN_1724059	22	22q12.2	GAS2L1	growth arrest specific 2 like 1	10634	-0.916644	0.000565
2750100	ILMN_3257884	22	22q12.3	HMGXB4	HMG-box containing 4	10042	-0.916619	3.46199e-07
1110440	ILMN_1742889	1	1p13.2	WDR77	WD repeat domain 77	79084	-0.916106	1.0835e-05
2630561	ILMN_1717490	12	12q24.13	RPL6	ribosomal protein L6	6128	-0.915511	7.86826e-05
2940528	ILMN_2398489	9	9p13.3	SIGMAR1	sigma non-opioid intracellular receptor 1	10280	-0.915454	0.000103832
360280	ILMN_2147306	1	1p36.11	PNRC2	proline rich nuclear receptor coactivator 2	55629	-0.915445	4.21745e-07
7400292	ILMN_1676406	16	16q24.3	CTU2	cytosolic thiouridylase subunit 2	348180	-0.915296	3.49651e-05
1580519	ILMN_1722742	NA	NA	NA	NA		-0.914318	4.27052e-05
4860646	ILMN_1712684	7	7p22.3	FAM20C	FAM20C, golgi associated secretory pathway kinase	56975	-0.913533	0.000163072
4290102	ILMN_3207122	6	6q21	GTF3C6	general transcription factor IIIC subunit 6	112495	-0.912853	2.89148e-05
3060154	ILMN_1660305	3	3p14.3	PDE12	phosphodiesterase 12	201626	-0.91265	8.62565e-06
2000022	ILMN_1745471	14	14q12	IRF9	interferon regulatory factor 9	10379	-0.912626	4.51486e-05
2630161	ILMN_1688971	17	17q24.2	NOL11	nucleolar protein 11	25926	-0.912568	7.12189e-09
2260376	ILMN_1777487	14	14q32.31	ZNF839	zinc finger protein 839	55778	-0.912518	0.000132398
4150242	ILMN_1656840	1	1p36.22-p36.21	VPS13D	vacuolar protein sorting 13 homolog D	55187	-0.91216	5.36898e-06
6400044	ILMN_1675797	7	7p14.1	EPDR1	ependymin related 1	54749	-0.911288	1.8703e-05
6330195	ILMN_1673023	12	12q24.33	EP400	E1A binding protein p400	57634	-0.910953	1.41037e-06
1770243	ILMN_1807423	7	7p15.3	IGF2BP3	insulin like growth factor 2 mRNA binding protein 3	10643	-0.910216	7.3515e-05
650563	ILMN_1701457	16	16p13.3	FAHD1	fumarylacetoacetate hydrolase domain containing 1	81889	-0.90901	0.000414859
1990441	ILMN_1655482	6	6p22.1	TRIM27	tripartite motif containing 27	5987	-0.908711	4.25953e-06
7330377	ILMN_1651336	16	16q23.3	MLYCD	malonyl-CoA decarboxylase	23417	-0.908362	0.000104466
450161	ILMN_2246661	16	16p13.3	FAHD1	fumarylacetoacetate hydrolase domain containing 1	81889	-0.90827	4.55992e-07
2760563	ILMN_2232520	3	3p25.1	ANKRD28	ankyrin repeat domain 28	23243	-0.907052	1.56521e-05
6960037	ILMN_1665212	16	16q22.1	EDC4	enhancer of mRNA decapping 4	23644	-0.90693	1.34474e-05
620577	ILMN_2370882	10	10q25.2	ACSL5	acyl-CoA synthetase long chain family member 5	51703	-0.906365	2.174e-08
3060278	ILMN_1764770	3	3p25.1-p24.3	OXNAD1	oxidoreductase NAD binding domain containing 1	92106	-0.906127	0.000199102
3890524	ILMN_1697166	9	9q34.11	C9orf78	chromosome 9 open reading frame 78	51759	-0.906037	8.0467e-07
2360156	ILMN_2385688	22	22q13.33	RABL2B	RAB, member of RAS oncogene family like 2B	11158	-0.904885	2.23146e-06
5420452	ILMN_1737715	8	8q22.2	OSR2	odd-skipped related transciption factor 2	116039	-0.903613	0.00234909
6760762	ILMN_1709227	11	11q23.3	CCDC84	coiled-coil domain containing 84	338657	-0.903411	0.00208054
5570523	ILMN_1672811	1	1p36.33	C1orf159	chromosome 1 open reading frame 159	54991	-0.902488	0.000319786
2480341	ILMN_1711005	3	3p21.31	CDC25A	cell division cycle 25A	993	-0.901781	0.000182788
5900678	ILMN_3250899	NA	NA	NA	NA		-0.901665	0.00016553
3800474	ILMN_2362549	10	10q21.1	ZWINT	ZW10 interacting kinetochore protein	11130	-0.90163	4.42097e-05
2340168	ILMN_1660412	NA	NA	NA	NA		-0.900502	1.1971e-05
6100301	ILMN_1678605	10	10p14-p13	CDC123	cell division cycle 123	8872	-0.90018	2.82119e-06
20670	ILMN_1671895	19	19q13.41	ZNF613	zinc finger protein 613	79898	-0.899828	9.14313e-06
4060358	ILMN_1766054	9	9q31.1	ABCA1	ATP binding cassette subfamily A member 1	19	-0.899691	4.7502e-06
520324	ILMN_1758941	5	5q22.2	REEP5	receptor accessory protein 5	7905	-0.898917	1.34708e-07
770102	ILMN_1662184	5	5p12	C5orf34	chromosome 5 open reading frame 34	375444	-0.898611	0.000268541
3180424	ILMN_1686387	8	8q24.3	PYCR3	pyrroline-5-carboxylate reductase 3	65263	-0.89788	3.94214e-06
5810671	ILMN_1718336	7	7p22.3	C7orf50	chromosome 7 open reading frame 50	84310	-0.897864	6.36413e-07
6020735	ILMN_1809590	16	16q24.1	GINS2	GINS complex subunit 2	51659	-0.897513	9.55407e-06
1740240	ILMN_2196097	5	5q31.1	PPP2CA	protein phosphatase 2 catalytic subunit alpha	5515	-0.896908	2.03415e-07
2470692	ILMN_2316599	16	16p11.2	ZNF629	zinc finger protein 629	23361	-0.896837	0.00816834
4830458	ILMN_2412927	3	3p21.31	GMPPB	GDP-mannose pyrophosphorylase B	29925	-0.895843	2.29559e-05
6380747	ILMN_1805985	5	5q15	SLF1	SMC5-SMC6 complex localization factor 1	84250	-0.895505	0.000455113
5910424	ILMN_1723971	6	6p21.1	SLC29A1	solute carrier family 29 member 1 (Augustine blood group)	2030	-0.895444	0.000295641
6760133	ILMN_1662964	11	11p15.1	PRMT3	protein arginine methyltransferase 3	10196	-0.895328	8.4491e-08
7210040	ILMN_2096405	10	10p15.3	WDR37	WD repeat domain 37	22884	-0.894648	1.77826e-06
130731	ILMN_1743939	5	5q31.1	C5orf24	chromosome 5 open reading frame 24	134553	-0.894616	0.00231785
7050014	ILMN_2394523	16	16q23.1	TMEM231	transmembrane protein 231	79583	-0.894493	0.000724976
4890240	ILMN_1743579	21	21q22.3	WDR4	WD repeat domain 4	10785	-0.894475	0.00208731
5050408	ILMN_1769931	1	1p34.3	SFPQ	splicing factor proline and glutamine rich	6421	-0.894443	0.00154013
2940059	ILMN_3246953	6	6p21.2	CMTR1	cap methyltransferase 1	23070	-0.894304	5.08965e-05
7210128	ILMN_2405297	1	1p12	NOTCH2	notch 2	4853	-0.894277	0.000101606
4010196	ILMN_2102670	3	3q21.3	GATA2	GATA binding protein 2	2624	-0.894226	0.00159578
5310324	ILMN_2051867	5	5q13.2	PTCD2	pentatricopeptide repeat domain 2	79810	-0.894167	0.000183157
6100564	ILMN_1716279	4	4q24	CENPE	centromere protein E	1062	-0.89409	7.53682e-06
110121	ILMN_1651872	1	1p36.22	UBIAD1	UbiA prenyltransferase domain containing 1	29914	-0.893637	5.18162e-07
20364	ILMN_1734827	10	10q26.2	MKI67	marker of proliferation Ki-67	4288	-0.893608	0.00279664
630364	ILMN_1656574	10	10q24.33	PCGF6	polycomb group ring finger 6	84108	-0.893522	1.44851e-05
6180414	ILMN_1760575	6	6q12	PTP4A1	protein tyrosine phosphatase type IVA, member 1	7803	-0.893192	0.00708802
2640246	ILMN_1711078	NA	NA	NA	NA		-0.892816	0.0183248
5720433	ILMN_1679881	8	8p12	WRN	Werner syndrome RecQ like helicase	7486	-0.892673	0.000155422
7160292	ILMN_1714165	16	16q22.1	ST3GAL2	ST3 beta-galactoside alpha-2,3-sialyltransferase 2	6483	-0.892622	4.37462e-05
6220148	ILMN_1764362	4	4p16.3	LYAR	Ly1 antibody reactive	55646	-0.891987	7.01012e-07
3930446	ILMN_1793517	12	12q24.13	RASAL1	RAS protein activator like 1	8437	-0.891701	0.000202574
2030307	ILMN_2412571	22	22q13.33	TUBGCP6	tubulin gamma complex associated protein 6	85378	-0.891197	7.90299e-05
2230189	ILMN_2368617	19	19q13.32	FKRP	fukutin related protein	79147	-0.890321	9.01608e-06
6590292	ILMN_2376289	7	7p13	DBNL	drebrin like	28988	-0.890019	0.000232675
2810382	ILMN_1755364	7	7p14.1	RALA	RAS like proto-oncogene A	5898	-0.889841	3.72568e-06
2320324	ILMN_1764329	21	21q22.11	CFAP298	cilia and flagella associated protein 298	56683	-0.889576	4.05866e-06
4050438	ILMN_3229733	9	9p13.3	SIGMAR1	sigma non-opioid intracellular receptor 1	10280	-0.889373	0.00441154
4640333	ILMN_1804263	6	6p21.31	ZNF76	zinc finger protein 76	7629	-0.889182	0.000216947
1570092	ILMN_1699489	18	18p11.21	TUBB6	tubulin beta 6 class V	84617	-0.888676	1.19544e-05
2470753	ILMN_1762466	15	15q24.1	BBS4	Bardet-Biedl syndrome 4	585	-0.888208	0.000233203
6900731	ILMN_2357781	1	1p36.12	ZNF436	zinc finger protein 436	80818	-0.888009	4.05375e-05
150747	ILMN_2351548	3	3q22.3	FAIM	Fas apoptotic inhibitory molecule	55179	-0.887504	8.43817e-05
5670523	ILMN_1735199	16	16q21	CIAPIN1	cytokine induced apoptosis inhibitor 1	57019	-0.887244	2.59481e-06
1440707	ILMN_1694875	17	17q23.2	APPBP2	amyloid beta precursor protein binding protein 2	10513	-0.886917	0.000285168
6130382	ILMN_1795336	10	10p13	PTER	phosphotriesterase related	9317	-0.885599	0.000662194
7570240	ILMN_1739397	1	1p22.1	GLMN	glomulin, FKBP associated protein	11146	-0.885533	2.78077e-06
830201	ILMN_1801443	11	11q13.5	TSKU	tsukushi, small leucine rich proteoglycan	25987	-0.885489	6.80473e-06
7510600	ILMN_2077733	12	12q24.13	NAA25	N(alpha)-acetyltransferase 25, NatB auxiliary subunit	80018	-0.885453	0.000265929
830379	ILMN_1722905	15	15q25.3	MRPS11	mitochondrial ribosomal protein S11	64963	-0.885398	6.06818e-05
780373	ILMN_1735075	1	1q44	PGBD2	piggyBac transposable element derived 2	267002	-0.884725	7.47586e-05
3360743	ILMN_1780659	4	4q28.1	NUDT6	nudix hydrolase 6	11162	-0.884578	2.98561e-05
2680128	ILMN_1664750	12	12q14.3	TMBIM4	transmembrane BAX inhibitor motif containing 4	51643	-0.884333	2.26806e-07
5130129	ILMN_1721225	20	20q11.23	AAR2	AAR2 splicing factor homolog	25980	-0.884264	2.35311e-05
940021	ILMN_1678546	1	1q21.1	PEX11B	peroxisomal biogenesis factor 11 beta	8799	-0.884105	2.05864e-06
4900386	ILMN_1765021	22	22q11.22	TOP3B	DNA topoisomerase III beta	8940	-0.883654	7.84443e-05
360537	ILMN_1668924	14	14q32.2	BEGAIN	brain enriched guanylate kinase associated	57596	-0.883582	0.00215167
3930059	ILMN_1669502	6	6p22.3	E2F3	E2F transcription factor 3	1871	-0.883169	4.41523e-06
4480014	ILMN_1704637	4	4p16.1	TRMT44	tRNA methyltransferase 44 homolog	152992	-0.883154	0.000141079
2490240	ILMN_2383611	10	10q26.2	PTPRE	protein tyrosine phosphatase, receptor type E	5791	-0.882921	0.00027958
5560338	ILMN_1717877	1	1q25.3	IVNS1ABP	influenza virus NS1A binding protein	10625	-0.882312	0.000887854
4540463	ILMN_1734915	1	1q24.2	METTL18	methyltransferase like 18	92342	-0.881805	0.000224396
5720327	ILMN_2318011	14	14q23.1	PSMA3	proteasome subunit alpha 3	5684	-0.881504	4.73729e-05
7320021	ILMN_1726306	11	11q23.3	HMBS	hydroxymethylbilane synthase	3145	-0.881398	7.56785e-07
6450048	ILMN_1739054	2	2p23.3	CCDC121	coiled-coil domain containing 121	79635	-0.880668	0.00122121
6510437	ILMN_3269405	19	19p13.2	HNRNPM	heterogeneous nuclear ribonucleoprotein M	4670	-0.880489	4.24273e-07
2360484	ILMN_1718898	12	12q13.13	HOXC9	homeobox C9	3225	-0.87955	7.9839e-05
650692	ILMN_2104696	8	8p23.3	ERICH1	glutamate rich 1	157697	-0.878704	6.3604e-06
4860356	ILMN_1682792	6	6p21.1	BYSL	bystin like	705	-0.878679	5.79721e-07
3170520	ILMN_2398847	16	16p12.1	ARHGAP17	Rho GTPase activating protein 17	55114	-0.878585	4.34469e-06
610040	ILMN_2199947	6	6q21	REV3L	REV3 like, DNA directed polymerase zeta catalytic subunit	5980	-0.878295	3.47189e-05
380672	ILMN_3237956	11	11q22.3	ZC3H12C	zinc finger CCCH-type containing 12C	85463	-0.878251	1.77965e-05
6520594	ILMN_2347380	1	1q23.1	ARHGEF11	Rho guanine nucleotide exchange factor 11	9826	-0.878182	0.00014422
2060047	ILMN_1685824	20	20q13.13	B4GALT5	beta-1,4-galactosyltransferase 5	9334	-0.877788	7.14832e-06
4900520	ILMN_1703178	2	2q36.1	SCG2	secretogranin II	7857	-0.877091	1.41346e-06
4050411	ILMN_1653001	18	18q11.2	CABLES1	Cdk5 and Abl enzyme substrate 1	91768	-0.876921	1.93386e-06
4810400	ILMN_1766346	20	20q13.33	ZNF512B	zinc finger protein 512B	57473	-0.87628	0.000754136
3290296	ILMN_1779423	1	1q25.1	MRPS14	mitochondrial ribosomal protein S14	63931	-0.87473	1.98098e-05
1260239	ILMN_2103362	17	17q21.31	ARHGAP27	Rho GTPase activating protein 27	201176	-0.874286	0.000183999
4610296	ILMN_1800993	16	16p13.3	CLUAP1	clusterin associated protein 1	23059	-0.874001	3.79123e-05
1500689	ILMN_2313821	X	Xq26.1	AIFM1	apoptosis inducing factor mitochondria associated 1	9131	-0.873886	3.57001e-06
5390010	ILMN_1690625	20	20q13.13	SLC9A8	solute carrier family 9 member A8	23315	-0.873753	2.78166e-05
3520382	ILMN_1722522	2	2q21.3	CCNT2	cyclin T2	905	-0.872967	4.75223e-06
6960242	ILMN_2221673	2	2q32.2	ASNSD1	asparagine synthetase domain containing 1	54529	-0.872392	1.34259e-07
2070403	ILMN_1762407	20	20q13.33	CABLES2	Cdk5 and Abl enzyme substrate 2	81928	-0.871458	0.000133554
2710402	ILMN_1743456	16	16q24.2	ZCCHC14	zinc finger CCHC-type containing 14	23174	-0.871406	5.55207e-05
2450286	ILMN_1744308	17	17p13.2	DHX33	DEAH-box helicase 33	56919	-0.871383	2.03036e-05
270332	ILMN_2391333	2	2q33.2	CYP20A1	cytochrome P450 family 20 subfamily A member 1	57404	-0.871223	8.37571e-05
5910600	ILMN_1673899	17	17p13.3	FAM57A	family with sequence similarity 57 member A	79850	-0.871032	4.59518e-06
6580132	ILMN_3238269	22	22q13.2	NDUFA6	NADH:ubiquinone oxidoreductase subunit A6	4700	-0.870994	1.8857e-07
4150519	ILMN_1788416	15	15q25.1	ABHD17C	abhydrolase domain containing 17C	58489	-0.870011	2.88689e-06
20139	ILMN_1723837	1	1p13.3	SLC6A17	solute carrier family 6 member 17	388662	-0.869637	0.000304237
6370278	ILMN_1757134	19	19p13.11	MPV17L2	MPV17 mitochondrial inner membrane protein like 2	84769	-0.869162	0.00117054
6840039	ILMN_1717403	9	9p13.3	ARHGEF39	Rho guanine nucleotide exchange factor 39	84904	-0.868131	0.000743427
2370414	ILMN_1713884	16	16p13.3	TSR3	TSR3, acp transferase ribosome maturation factor	115939	-0.86773	2.42159e-05
2340673	ILMN_1734543	10	10q26.2	PTPRE	protein tyrosine phosphatase, receptor type E	5791	-0.867295	5.17969e-05
3710202	ILMN_1707464	NA	NA	NA	NA		-0.867292	0.0468026
2060612	ILMN_1811327	17	17q21.33	MRPL27	mitochondrial ribosomal protein L27	51264	-0.867246	4.87791e-05
4260612	ILMN_2402363	6	6p21.33	STK19	serine/threonine kinase 19	8859	-0.867132	8.30708e-06
5490086	ILMN_1779184	16	16q24.3	CTU2	cytosolic thiouridylase subunit 2	348180	-0.866586	0.000637236
4640064	ILMN_1667476	12	12p13.31	LTBR	lymphotoxin beta receptor	4055	-0.866076	6.68387e-06
1820189	ILMN_2182198	17	17q25.1	MRPL58	mitochondrial ribosomal protein L58	3396	-0.866074	1.00001e-06
1990110	ILMN_1746788	6	6p22.1	TRIM10	tripartite motif containing 10	10107	-0.865987	3.26897e-05
1030376	ILMN_2382906	20	20q12	PLCG1	phospholipase C gamma 1	5335	-0.865768	1.00814e-06
2940725	ILMN_1796595	5	5p13.3	C5orf22	chromosome 5 open reading frame 22	55322	-0.865738	5.64882e-05
6330465	ILMN_1670124	NA	NA	NA	NA		-0.865189	2.2859e-05
2350176	ILMN_1654583	5	5q15-q21.1	CHD1	chromodomain helicase DNA binding protein 1	1105	-0.865047	0.000271569
5910594	ILMN_1769779	8	8q24.3	PTP4A3	protein tyrosine phosphatase type IVA, member 3	11156	-0.864952	0.00206344
7550224	ILMN_1750718	2	2q37.1	GIGYF2	GRB10 interacting GYF protein 2	26058	-0.86426	5.02091e-06
4280437	ILMN_1761314	20	20q11.22	NFS1	NFS1, cysteine desulfurase	9054	-0.864216	0.000329054
1740674	ILMN_1751627	1	1p34.3	TRAPPC3	trafficking protein particle complex 3	27095	-0.863889	5.66115e-07
4390326	ILMN_1798817	16	16q23.3	SDR42E1	short chain dehydrogenase/reductase family 42E, member 1	93517	-0.863831	0.000444713
1510327	ILMN_2324157	3	3p14.1	UBA3	ubiquitin like modifier activating enzyme 3	9039	-0.863683	6.74665e-05
3800050	ILMN_1676893	2	2p23.3	ADCY3	adenylate cyclase 3	109	-0.863648	5.13673e-07
7000703	ILMN_1801664	16	16p13.3	POLR3K	RNA polymerase III subunit K	51728	-0.863268	4.66152e-05
2070730	ILMN_1690049	14	14q11.2	NGDN	neuroguidin	25983	-0.86215	1.30733e-05
3440672	ILMN_1693668	10	10q23.2	WAPL	WAPL cohesin release factor	23063	-0.861761	2.03947e-05
6650543	ILMN_1801984	3	3p25.3	VHL	von Hippel-Lindau tumor suppressor	7428	-0.860502	8.03025e-06
6900538	ILMN_1725773	10	10q21.3	DNAJC12	DnaJ heat shock protein family (Hsp40) member C12	56521	-0.859435	0.000650988
6660368	ILMN_2365111	19	19q13.2	MAP4K1	mitogen-activated protein kinase kinase kinase kinase 1	11184	-0.859222	2.49171e-06
1010497	ILMN_1739368	7	7q22.1	ZSCAN25	zinc finger and SCAN domain containing 25	221785	-0.85919	7.20797e-07
5700504	ILMN_1691499	15	15q13.1	TJP1	tight junction protein 1	7082	-0.859129	7.48236e-06
1010682	ILMN_1792825	3	3p21.31	ARIH2	ariadne RBR E3 ubiquitin protein ligase 2	10425	-0.859104	6.78101e-06
7320068	ILMN_1841620	NA	NA	NA	NA		-0.859042	0.000794138
5960546	ILMN_1687430	2	2p23.3	EIF2B4	eukaryotic translation initiation factor 2B subunit delta	8890	-0.858178	8.79086e-08
7210280	ILMN_2044293	13	13q14.11	KBTBD7	kelch repeat and BTB domain containing 7	84078	-0.857478	0.000695537
6270646	ILMN_1680618	8	8q24.21	MYC	MYC proto-oncogene, bHLH transcription factor	4609	-0.857112	0.000336732
540156	ILMN_2188521	3	3q13.13	NECTIN3	nectin cell adhesion molecule 3	25945	-0.856999	0.00151133
6940554	ILMN_1777129	16	16q22.1	CENPT	centromere protein T	80152	-0.856971	0.00118562
670279	ILMN_1664034	10	10q11.21	ZNF485	zinc finger protein 485	220992	-0.856693	0.00018441
1450156	ILMN_2215656	1	1p32.3	MAGOH	mago homolog, exon junction complex subunit	4116	-0.856657	1.51096e-05
270341	ILMN_2401761	4	4q22.1	NUDT9	nudix hydrolase 9	53343	-0.855786	0.00288758
4120408	ILMN_1811303	1	1q32.1	NR5A2	nuclear receptor subfamily 5 group A member 2	2494	-0.855373	2.89368e-05
5860519	ILMN_1666894	15	15q24.2	CSPG4	chondroitin sulfate proteoglycan 4	1464	-0.855293	3.58555e-07
6290181	ILMN_1683082	16	16p13.3	RPUSD1	RNA pseudouridine synthase domain containing 1	113000	-0.855276	7.86197e-05
6650053	ILMN_2224143	6	6p12.2	MCM3	minichromosome maintenance complex component 3	4172	-0.855052	3.72056e-06
6380364	ILMN_2324561	16	16q22.1	SLC7A6	solute carrier family 7 member 6	9057	-0.855029	0.000121062
1410563	ILMN_1801822	18	18q21.1	C18orf25	chromosome 18 open reading frame 25	147339	-0.854008	2.49469e-06
3120086	ILMN_2080611	10	10p12.1	PDSS1	decaprenyl diphosphate synthase subunit 1	23590	-0.853719	2.19416e-06
1660681	ILMN_1796762	16	16q21	CCDC102A	coiled-coil domain containing 102A	92922	-0.853604	9.16564e-06
6370639	ILMN_1664994	10	10q23.2	MINPP1	multiple inositol-polyphosphate phosphatase 1	9562	-0.853455	0.000196043
10731	ILMN_2348403	19	19q13.33	VRK3	VRK serine/threonine kinase 3	51231	-0.853453	0.002963
2340653	ILMN_3248928	7	7q34	UBN2	ubinuclein 2	254048	-0.853199	0.000241578
4590468	ILMN_2268026	15	15q22.31	INTS14	integrator complex subunit 14	81556	-0.852793	0.000156664
3710221	ILMN_1728724	22	22q11.1	IL17RA	interleukin 17 receptor A	23765	-0.852122	0.000673857
360747	ILMN_1753498	17	17q21.2	COASY	Coenzyme A synthase	80347	-0.852114	4.18575e-07
270309	ILMN_1768640	20	20p11.23	CRNKL1	crooked neck pre-mRNA splicing factor 1	51340	-0.851716	0.000280977
7330026	ILMN_1788213	10	10q24.1	FRAT2	FRAT2, WNT signaling pathway regulator	23401	-0.851608	4.79102e-05
4780600	ILMN_3224926	4	4p14	RBM47	RNA binding motif protein 47	54502	-0.851174	5.03265e-05
7330253	ILMN_1815169	22	22q12.3	MCM5	minichromosome maintenance complex component 5	4174	-0.850916	0.00140833
2680435	ILMN_2076658	4	4q21.1	MRPL1	mitochondrial ribosomal protein L1	65008	-0.85077	1.12985e-05
1050017	ILMN_1718069	17	17p13.2	MIS12	MIS12, kinetochore complex component	79003	-0.850696	3.38679e-05
5670180	ILMN_1695731	17	17q21.2	TUBG1	tubulin gamma 1	7283	-0.850552	1.63757e-07
3130307	ILMN_3297126	22	22q13.33	TYMP	thymidine phosphorylase	1890	-0.85031	0.00133468
3780239	ILMN_1727390	17	17p11.2	ATPAF2	ATP synthase mitochondrial F1 complex assembly factor 2	91647	-0.85031	0.00122169
4060176	ILMN_1794539	10	10q23.33	KIF11	kinesin family member 11	3832	-0.849647	5.44767e-06
3130280	ILMN_3270641	10	10q21.3	HNRNPH3	heterogeneous nuclear ribonucleoprotein H3	3189	-0.849637	8.95202e-06
3850228	ILMN_1703015	1	1p31.1	ZRANB2	zinc finger RANBP2-type containing 2	9406	-0.849548	2.86153e-07
3420433	ILMN_1743784	17	17p11.2	SHMT1	serine hydroxymethyltransferase 1	6470	-0.84884	0.000830122
4850307	ILMN_3289262	1	1p36.11	PNRC2	proline rich nuclear receptor coactivator 2	55629	-0.848762	4.93195e-06
2490470	ILMN_1739103	1	1q24.2	MPZL1	myelin protein zero like 1	9019	-0.848727	0.000316519
2900072	ILMN_1809607	10	10q22.3	PPIF	peptidylprolyl isomerase F	10105	-0.848701	0.000218055
2490044	ILMN_1682896	21	21q22.11	PAXBP1	PAX3 and PAX7 binding protein 1	94104	-0.84836	0.000113112
510544	ILMN_2238928	17	17q22	RAD51C	RAD51 paralog C	5889	-0.847905	0.000262452
130239	ILMN_1763162	1	1p34.1	DPH2	DPH2 homolog	1802	-0.847689	0.00129218
4050278	ILMN_3247556	8	8q24.3	MROH6	maestro heat like repeat family member 6	642475	-0.846711	0.00416852
7000086	ILMN_1803476	6	6p21.31	KCTD20	potassium channel tetramerization domain containing 20	222658	-0.846549	0.00129133
4120538	ILMN_1785756	11	11q23.3	H2AFX	H2A histone family member X	3014	-0.84559	0.000210298
3890544	ILMN_1771903	12	12q23.2	NUP37	nucleoporin 37	79023	-0.845568	1.24506e-07
6550600	ILMN_2110908	8	8q24.21	MYC	MYC proto-oncogene, bHLH transcription factor	4609	-0.844703	0.00286848
4290377	ILMN_1690442	18	18q11.2	TMEM241	transmembrane protein 241	85019	-0.844153	5.38783e-05
1660687	ILMN_2346460	15	15q22.2	ICE2	interactor of little elongation complex ELL subunit 2	79664	-0.844097	2.57358e-05
1010719	ILMN_1755834	11	11q12.2	FEN1	flap structure-specific endonuclease 1	2237	-0.843885	2.89079e-05
6130161	ILMN_2306066	16	16p11.2	FUS	FUS RNA binding protein	2521	-0.843861	0.00815513
110110	ILMN_2092536	NA	NA	NA	NA		-0.843662	0.00443295
6560427	ILMN_1701512	14	14q13.2	KIAA0391	KIAA0391	9692	-0.843524	7.48614e-06
6980274	ILMN_1680727	1	1q31.2	GLRX2	glutaredoxin 2	51022	-0.843212	0.000112519
610221	ILMN_2333865	10	10q22.1	DNAJB12	DnaJ heat shock protein family (Hsp40) member B12	54788	-0.842654	4.45149e-05
4810433	ILMN_1778734	15	15q13.3	FAN1	FANCD2 and FANCI associated nuclease 1	22909	-0.842644	7.4648e-05
6350370	ILMN_1770548	3	3p22.3	CLASP2	cytoplasmic linker associated protein 2	23122	-0.842639	0.0154494
7100280	ILMN_1739345	11	11q12.3	LBHD1	LBH domain containing 1	79081	-0.842343	0.000829091
2320093	ILMN_1672366	NA	NA	NA	NA		-0.842334	6.09333e-07
6550349	ILMN_1728514	14	14q32.33	BAG5	BCL2 associated athanogene 5	9529	-0.8423	3.81332e-05
4200110	ILMN_1691578	6	6q21	GTF3C6	general transcription factor IIIC subunit 6	112495	-0.841966	1.19546e-05
1440296	ILMN_1695706	17	17q25.1	H3F3B	H3 histone family member 3B	3021	-0.841124	8.01364e-06
4900465	ILMN_1693108	3	3q21.3	RUVBL1	RuvB like AAA ATPase 1	8607	-0.841087	7.67487e-07
1190707	ILMN_1719204	19	19q13.42	PRPF31	pre-mRNA processing factor 31	26121	-0.840795	1.11584e-05
4760450	ILMN_1801118	16	16p13.3	SNRNP25	small nuclear ribonucleoprotein U11/U12 subunit 25	79622	-0.840554	4.64579e-05
6100324	ILMN_1766851	11	11q14.1	TMEM126B	transmembrane protein 126B	55863	-0.840388	3.63625e-06
1500358	ILMN_2075643	18	18q11.2	ANKRD29	ankyrin repeat domain 29	147463	-0.840212	0.00574651
990121	ILMN_1744830	15	15q13.3	ARHGAP11A	Rho GTPase activating protein 11A	9824	-0.840152	0.000747701
6980327	ILMN_1671257	X	Xq28	DKC1	dyskerin pseudouridine synthase 1	1736	-0.840078	3.97048e-08
4570441	ILMN_1781373	2	2q24.2	IFIH1	interferon induced with helicase C domain 1	64135	-0.840056	0.000152017
3360553	ILMN_1701111	20	20p12.3	GPCPD1	glycerophosphocholine phosphodiesterase 1	56261	-0.839773	7.10748e-05
2570079	ILMN_1691364	2	2q32.2	STAT1	signal transducer and activator of transcription 1	6772	-0.839671	2.75862e-06
1300491	ILMN_1785198	9	9q32	POLE3	DNA polymerase epsilon 3, accessory subunit	54107	-0.838956	5.72342e-09
4730674	ILMN_1791002	5	5p13.2	SKP2	S-phase kinase associated protein 2	6502	-0.838735	1.74059e-05
2900373	ILMN_1747067	19	19q13.32	NPAS1	neuronal PAS domain protein 1	4861	-0.838426	0.000129477
2940040	ILMN_1786433	10	10q26.2	BCCIP	BRCA2 and CDKN1A interacting protein	56647	-0.837811	9.56416e-06
2750280	ILMN_1730928	17	17q11.2	CDK5R1	cyclin dependent kinase 5 regulatory subunit 1	8851	-0.837788	8.79011e-07
6130762	ILMN_3306950	16	16q24.3	CDK10	cyclin dependent kinase 10	8558	-0.837235	0.000783431
2510692	ILMN_2395285	12	12q24.31	SNRNP35	small nuclear ribonucleoprotein U11/U12 subunit 35	11066	-0.836828	0.00262395
5290259	ILMN_1705390	22	22q11.21	KLHL22	kelch like family member 22	84861	-0.836801	1.10529e-06
3310632	ILMN_1745778	NA	NA	NA	NA		-0.836651	6.28308e-05
830661	ILMN_2174127	3	c("3q12.1", "3")	DCBLD2	discoidin, CUB and LCCL domain containing 2	131566	-0.836534	2.81691e-06
1820746	ILMN_1730539	3	3q22.1	NPHP3	nephrocystin 3	27031	-0.836503	0.0148958
780608	ILMN_1688606	17	17q23.1	RNFT1	ring finger protein, transmembrane 1	51136	-0.836133	0.00261208
110270	ILMN_1784766	21	21q22.3	MCM3AP	minichromosome maintenance complex component 3 associated protein	8888	-0.83602	5.97028e-05
5220653	ILMN_1732216	18	18q21.31	NARS	asparaginyl-tRNA synthetase	4677	-0.83564	1.02059e-07
6330646	ILMN_1669094	1	1q44	ZNF672	zinc finger protein 672	79894	-0.835449	9.29744e-07
2900139	ILMN_1778144	12	12q13.11	SLC48A1	solute carrier family 48 member 1	55652	-0.834171	0.00224887
5290634	ILMN_1731193	19	19q13.33	BCL2L12	BCL2 like 12	83596	-0.833967	0.00136474
7200719	ILMN_1756086	1	1q21.3	INTS3	integrator complex subunit 3	65123	-0.833896	9.12802e-06
5900253	ILMN_1763207	1	1q32.3	BATF3	basic leucine zipper ATF-like transcription factor 3	55509	-0.833407	3.37777e-05
3930324	ILMN_2368721	22	22q13.2	CENPM	centromere protein M	79019	-0.833325	0.00154317
6650201	ILMN_1801600	19	19q13.2	CCDC97	coiled-coil domain containing 97	90324	-0.833308	7.0275e-06
3370142	ILMN_3236945	11	11p11.2	PTPMT1	protein tyrosine phosphatase, mitochondrial 1	114971	-0.833122	1.17468e-05
6980477	ILMN_2355042	16	16p13.3	CLUAP1	clusterin associated protein 1	23059	-0.833076	1.64316e-07
3390075	ILMN_1793549	2	2q14.2	PTPN4	protein tyrosine phosphatase, non-receptor type 4	5775	-0.83291	0.000183401
4280228	ILMN_2397750	1	1q25.3	IVNS1ABP	influenza virus NS1A binding protein	10625	-0.832878	0.000489441
6100259	ILMN_1676413	2	2p24.2	VSNL1	visinin like 1	7447	-0.832693	0.00214729
5270619	ILMN_1772686	9	9q22.31	FGD3	FYVE, RhoGEF and PH domain containing 3	89846	-0.832493	2.36588e-06
4050711	ILMN_1660635	8	8q13.3	LACTB2	lactamase beta 2	51110	-0.832069	1.77771e-05
6280048	ILMN_1710075	1	1q42.2	FAM89A	family with sequence similarity 89 member A	375061	-0.831995	0.000356688
6860373	ILMN_1770733	11	11p15.5	RIC8A	RIC8 guanine nucleotide exchange factor A	60626	-0.831731	1.57274e-06
3930241	ILMN_2362368	21	21q22.3	U2AF1	U2 small nuclear RNA auxiliary factor 1	7307	-0.831561	0.00050322
460333	ILMN_2373556	2	2p22.3	SPAST	spastin	6683	-0.831305	0.00294515
4120279	ILMN_1740772	5	5q31.3	APBB3	amyloid beta precursor protein binding family B member 3	10307	-0.830911	0.00371809
2350504	ILMN_2109708	22	22q13.33	TYMP	thymidine phosphorylase	1890	-0.830778	3.12375e-06
2850039	ILMN_2064606	15	15q24.3-q25.1	TBC1D2B	TBC1 domain family member 2B	23102	-0.830462	0.000132752
5890736	ILMN_1726574	1	1q25.1	CACYBP	calcyclin binding protein	27101	-0.82992	0.000297683
5910301	ILMN_1760933	1	1p36.32	PEX10	peroxisomal biogenesis factor 10	5192	-0.829438	0.000191838
4780523	ILMN_1725387	6	6q23.1	TMEM200A	transmembrane protein 200A	114801	-0.829306	7.81307e-06
2320189	ILMN_2338997	1	1p35.2	PTP4A2	protein tyrosine phosphatase type IVA, member 2	8073	-0.829109	0.00456546
5220612	ILMN_2072178	10	10p14	ECHDC3	enoyl-CoA hydratase domain containing 3	79746	-0.829101	3.31363e-07
5570639	ILMN_1668179	10	10q11.21	HNRNPF	heterogeneous nuclear ribonucleoprotein F	3185	-0.82894	0.0016851
2570669	ILMN_1657148	19	19p13.3	CIRBP-AS1	CIRBP antisense RNA 1	148046	-0.828614	3.62253e-05
6330438	ILMN_1742330	3	3p21.31	PLXNB1	plexin B1	5364	-0.828499	0.00894149
770379	ILMN_2223380	5	5q12.3	PPWD1	peptidylprolyl isomerase domain and WD repeat containing 1	23398	-0.828425	0.000162211
7000333	ILMN_2397776	9	9q34.11	ASB6	ankyrin repeat and SOCS box containing 6	140459	-0.828368	0.000576971
160279	ILMN_2076463	12	12q24.33	SLC15A4	solute carrier family 15 member 4	121260	-0.828308	9.34691e-07
1850435	ILMN_1697916	11	11p11.2	LARGE2	LARGE xylosyl- and glucuronyltransferase 2	120071	-0.827969	0.00272009
130364	ILMN_1684368	5	5q33.1	SMIM3	small integral membrane protein 3	85027	-0.827666	0.00106204
840176	ILMN_1813350	16	16q22.1	HSD11B2	hydroxysteroid 11-beta dehydrogenase 2	3291	-0.827643	0.00271547
4260176	ILMN_1737953	17	17q22	MKS1	Meckel syndrome, type 1	54903	-0.827515	0.00104503
4200195	ILMN_1751393	1	1p34.2	ZNF684	zinc finger protein 684	127396	-0.82736	0.00293801
150577	ILMN_2370772	3	3q27.1	EIF4G1	eukaryotic translation initiation factor 4 gamma 1	1981	-0.827238	0.000192447
6100441	ILMN_1697440	9	9q32	PRPF4	pre-mRNA processing factor 4	9128	-0.827148	8.10614e-09
4280370	ILMN_1696133	2	2p23.3	SELENOI	selenoprotein I	85465	-0.827021	4.21687e-06
2320576	ILMN_3306730	4	4p14	RBM47	RNA binding motif protein 47	54502	-0.826525	0.00120026
5130091	ILMN_1772692	14	14q32.13	DICER1	dicer 1, ribonuclease III	23405	-0.826483	0.000262558
150630	ILMN_1719039	17	17p13.2	UBE2G1	ubiquitin conjugating enzyme E2 G1	7326	-0.826303	9.5314e-07
1990438	ILMN_1708095	20	20p13	PANK2	pantothenate kinase 2	80025	-0.826255	2.06006e-06
2710196	ILMN_1778238	17	17q11.2	UTP6	UTP6, small subunit processome component	55813	-0.826115	1.91125e-05
7050523	ILMN_1815051	11	11p12	API5	apoptosis inhibitor 5	8539	-0.825982	9.08395e-05
4560367	ILMN_1759729	9	9q33.2	NDUFA8	NADH:ubiquinone oxidoreductase subunit A8	4702	-0.825918	1.33511e-07
3930082	ILMN_1697115	19	19q13.11	CEBPA-DT	CEBPA divergent transcript	80054	-0.825584	1.53752e-05
3440014	ILMN_1703132	6	6q15	LYRM2	LYR motif containing 2	57226	-0.825515	0.00247979
5050255	ILMN_1677133	2	2q11.2	MITD1	microtubule interacting and trafficking domain containing 1	129531	-0.82543	0.000151566
4880132	ILMN_1788468	13	13q33.3	ARGLU1	arginine and glutamate rich 1	55082	-0.825269	0.00108116
1110243	ILMN_1743806	17	17q25.1	MIF4GD	MIF4G domain containing	57409	-0.824882	7.61277e-05
4900612	ILMN_1685052	3	3p21.1	DNAH1	dynein axonemal heavy chain 1	25981	-0.824828	0.00251603
7400619	ILMN_1729179	15	15q21.1	SPATA5L1	spermatogenesis associated 5 like 1	79029	-0.824789	4.2554e-07
5310537	ILMN_1730685	11	11q12.1	MRPL16	mitochondrial ribosomal protein L16	54948	-0.824621	2.5778e-06
4050056	ILMN_1758457	17	17q25.3	TBC1D16	TBC1 domain family member 16	125058	-0.824446	0.000539952
4290017	ILMN_1797557	1	1q32.1	PLEKHA6	pleckstrin homology domain containing A6	22874	-0.824181	0.000157735
2470220	ILMN_1677432	12	12q14.2	SRGAP1	SLIT-ROBO Rho GTPase activating protein 1	57522	-0.824121	0.00145983
5860066	ILMN_2062620	10	10p13	NMT2	N-myristoyltransferase 2	9397	-0.823985	0.000707788
6330400	ILMN_1792669	21	21q22.13	HLCS	holocarboxylase synthetase	3141	-0.823222	0.000262901
1430608	ILMN_1702613	2	2p13.1	C2orf78	chromosome 2 open reading frame 78	388960	-0.823217	0.000121084
3060661	ILMN_1725594	10	10p13	MINDY3	MINDY lysine 48 deubiquitinase 3	80013	-0.823128	9.42963e-07
6250427	ILMN_3247139	17	17q12	EPOP	elongin BC and polycomb repressive complex 2 associated protein	100170841	-0.823028	0.00085413
6290494	ILMN_1806818	6	6p12.2	MCM3	minichromosome maintenance complex component 3	4172	-0.822978	5.23976e-06
4780040	ILMN_1705464	9	9q34.3	MRPL41	mitochondrial ribosomal protein L41	64975	-0.822534	5.26402e-05
3800521	ILMN_1715832	3	3q22.1	PIK3R4	phosphoinositide-3-kinase regulatory subunit 4	30849	-0.82226	0.000248022
4610731	ILMN_1674231	21	21q22.12-q22.13	CHAF1B	chromatin assembly factor 1 subunit B	8208	-0.821929	7.4525e-08
2940095	ILMN_2124471	5	5q33.1	SLC36A1	solute carrier family 36 member 1	206358	-0.821829	0.000348303
5960097	ILMN_2092664	1	1q44	ADSS	adenylosuccinate synthase	159	-0.821786	1.35805e-07
5560706	ILMN_1664014	10	10q22.1	STOX1	storkhead box 1	219736	-0.821512	8.1375e-05
1570661	ILMN_1758731	1	1p32.1	CYP2J2	cytochrome P450 family 2 subfamily J member 2	1573	-0.821251	1.36309e-05
3460324	ILMN_2387553	14	14q23.1	PSMA3	proteasome subunit alpha 3	5684	-0.820604	1.75189e-05
990100	ILMN_2067709	1	1q44	TFB2M	transcription factor B2, mitochondrial	64216	-0.820571	0.00142065
160390	ILMN_2359500	1	1p34.3	NCDN	neurochondrin	23154	-0.820567	0.00397099
2970079	ILMN_1778464	21	21q22.3	TRAPPC10	trafficking protein particle complex 10	7109	-0.820189	0.000249365
6060452	ILMN_1739770	5	5q33.3	MED7	mediator complex subunit 7	9443	-0.820104	1.32171e-06
150438	ILMN_1668960	X	Xp11.4	MID1IP1	MID1 interacting protein 1	58526	-0.820012	6.28887e-05
1510674	ILMN_1793578	9	9q32	ZFP37	ZFP37 zinc finger protein	7539	-0.819863	0.00186655
3940639	ILMN_1808568	1	1q42.12	PYCR2	pyrroline-5-carboxylate reductase 2	29920	-0.819731	2.05283e-05
5340487	ILMN_1718932	5	5p15.31	MTRR	5-methyltetrahydrofolate-homocysteine methyltransferase reductase	4552	-0.819699	1.44428e-06
650619	ILMN_1652525	9	9q33.3	MVB12B	multivesicular body subunit 12B	89853	-0.81921	9.61618e-06
5810600	ILMN_1726547	6	6q23.3	MAP3K5	mitogen-activated protein kinase kinase kinase 5	4217	-0.818672	1.0102e-05
5570110	ILMN_1735788	22	22q13.1	TRIOBP	TRIO and F-actin binding protein	11078	-0.818457	4.99214e-05
1300553	ILMN_1804113	19	19p13.11	RFXANK	regulatory factor X associated ankyrin containing protein	8625	-0.818424	0.00101975
6250707	ILMN_1757384	NA	NA	NA	NA		-0.818362	1.61619e-05
2340605	ILMN_2234709	12	12p13.1-p12.3	C12orf60	chromosome 12 open reading frame 60	144608	-0.817584	0.000679306
6290187	ILMN_2337492	11	11q13.2	RCE1	Ras converting CAAX endopeptidase 1	9986	-0.81735	0.00160429
2750360	ILMN_1765880	16	16q21	USB1	U6 snRNA biogenesis phosphodiesterase 1	79650	-0.816922	8.12915e-05
2190047	ILMN_1683112	9	9q22.32	FANCC	FA complementation group C	2176	-0.81646	9.99228e-05
770538	ILMN_1724493	15	15q21.2	LYSMD2	LysM domain containing 2	256586	-0.816453	0.000148537
2480747	ILMN_2321485	1	1p35.3	PPP1R8	protein phosphatase 1 regulatory subunit 8	5511	-0.81644	2.39352e-06
5310369	ILMN_2221564	4	4p16.3	LYAR	Ly1 antibody reactive	55646	-0.815959	6.63258e-05
7380026	ILMN_1655952	9	9p24.3	WASHC1	WASH complex subunit 1	100287171	-0.81588	0.000492908
2350156	ILMN_3247848	19	19q13.41	SPACA6	sperm acrosome associated 6	147650	-0.815786	0.000744327
1570138	ILMN_2317348	9	9p21.1	APTX	aprataxin	54840	-0.815496	2.29839e-08
580064	ILMN_1688041	1	1p34.1	TMEM53	transmembrane protein 53	79639	-0.814844	7.35609e-05
3400709	ILMN_1882590	9	9q34.3	NACC2	NACC family member 2	138151	-0.814595	1.02325e-05
6370674	ILMN_2134888	6	6q21	TUBE1	tubulin epsilon 1	51175	-0.814281	0.00189816
3710026	ILMN_1673073	19	19q13.12	WDR62	WD repeat domain 62	284403	-0.813796	0.00132496
1090437	ILMN_1742577	10	10p15.3	GTPBP4	GTP binding protein 4	23560	-0.813472	5.48937e-07
4040382	ILMN_1779639	6	6q14.1	IRAK1BP1	interleukin 1 receptor associated kinase 1 binding protein 1	134728	-0.81347	1.27758e-05
4280561	ILMN_1792314	10	10q24.32	ACTR1A	ARP1 actin related protein 1 homolog A	10121	-0.813361	1.65332e-05
6450021	ILMN_1802973	4	4p15.2	ANAPC4	anaphase promoting complex subunit 4	29945	-0.813266	2.88222e-05
2970133	ILMN_1698950	21	21q22.3	PWP2	PWP2, small subunit processome component	5822	-0.812885	0.000115879
2600240	ILMN_1790317	16	16p13.3	RAB26	RAB26, member RAS oncogene family	25837	-0.812471	0.000535904
2600291	ILMN_1753639	9	9p21.3	MTAP	methylthioadenosine phosphorylase	4507	-0.812145	1.28961e-05
2760653	ILMN_1755792	12	12p11.23	STK38L	serine/threonine kinase 38 like	23012	-0.812001	0.000165983
6520730	ILMN_2357809	5	5q33.1	G3BP1	G3BP stress granule assembly factor 1	10146	-0.811411	0.00173273
2630673	ILMN_1695414	19	19p13.12	ASF1B	anti-silencing function 1B histone chaperone	55723	-0.810432	0.000243897
5130458	ILMN_2090123	5	5q11.2	DHX29	DExH-box helicase 29	54505	-0.809247	1.92544e-05
6660195	ILMN_1795383	3	3p25.3	RPUSD3	RNA pseudouridine synthase D3	285367	-0.809055	1.85506e-05
5360528	ILMN_1715188	15	15q21.2	USP8	ubiquitin specific peptidase 8	9101	-0.808888	8.88052e-05
2140343	ILMN_3242883	10	10q11.22	AGAP4	ArfGAP with GTPase domain, ankyrin repeat and PH domain 4	119016	-0.808208	0.0105055
1450386	ILMN_1811188	10	10q26.2	BCCIP	BRCA2 and CDKN1A interacting protein	56647	-0.808127	3.21534e-06
1190047	ILMN_1791593	12	12p11.21	DENND5B	DENN domain containing 5B	160518	-0.80811	0.0056029
670112	ILMN_1740171	2	2p13.1	DUSP11	dual specificity phosphatase 11	8446	-0.807856	1.6447e-06
3520022	ILMN_3185453	8	8p23.1	FAM86B3P	family with sequence similarity 86, member A pseudogene	286042	-0.807832	5.95714e-05
3780100	ILMN_1781966	22	22q12.2	OSBP2	oxysterol binding protein 2	23762	-0.807517	6.02726e-05
6590139	ILMN_1748057	19	19p13.2	CERS4	ceramide synthase 4	79603	-0.807249	9.06882e-05
7380553	ILMN_1654357	18	18q12.2	ZNF24	zinc finger protein 24	7572	-0.80679	0.000104573
6060152	ILMN_3250870	4	4q12	USP46	ubiquitin specific peptidase 46	64854	-0.80672	0.00135477
2940707	ILMN_2335072	16	16q24.1	TAF1C	TATA-box binding protein associated factor, RNA polymerase I subunit C	9013	-0.806662	3.31293e-05
3940615	ILMN_1779353	7	7q22.3	PUS7	pseudouridine synthase 7	54517	-0.80625	1.63201e-05
5220187	ILMN_1798874	15	15q14	EMC4	ER membrane protein complex subunit 4	51234	-0.805598	5.53095e-07
510474	ILMN_1684321	16	16q22.1	CYB5B	cytochrome b5 type B	80777	-0.805355	1.81203e-06
4900575	ILMN_2311548	17	17q23.1	PTRH2	peptidyl-tRNA hydrolase 2	51651	-0.80534	1.84965e-05
6270112	ILMN_1752988	11	11p15.4	AKIP1	A-kinase interacting protein 1	56672	-0.80524	4.00846e-06
6770487	ILMN_1863592	NA	NA	NA	NA		-0.805236	0.000118997
3710609	ILMN_1777881	5	5q35.2	TSPAN17	tetraspanin 17	26262	-0.805109	5.23592e-07
610301	ILMN_1719792	3	3q13.2	PHLDB2	pleckstrin homology like domain family B member 2	90102	-0.805063	0.00043596
3130192	ILMN_1805404	9	9q34.3	GRIN1	glutamate ionotropic receptor NMDA type subunit 1	2902	-0.805035	0.000151277
7100424	ILMN_1703153	16	16p13.3	GLYR1	glyoxylate reductase 1 homolog	84656	-0.805025	4.29652e-05
620075	ILMN_2381121	20	20q11.22	UQCC1	ubiquinol-cytochrome c reductase complex assembly factor 1	55245	-0.804628	1.40337e-07
1820037	ILMN_1745034	12	12q13.12	SLC11A2	solute carrier family 11 member 2	4891	-0.803325	3.54079e-07
5870446	ILMN_1676393	17	17q21.32	ATP5MC1	ATP synthase membrane subunit c locus 1	516	-0.80285	0.000862833
360463	ILMN_1753515	17	17p13.3	SRR	serine racemase	63826	-0.802759	0.00011263
2470050	ILMN_1728071	12	12p12.1	KRAS	KRAS proto-oncogene, GTPase	3845	-0.80218	1.42857e-06
4490528	ILMN_1790891	12	12q23.3	CKAP4	cytoskeleton associated protein 4	10970	-0.801471	7.39591e-07
3400593	ILMN_1728845	12	12q13.12	SMARCD1	SWI/SNF related, matrix associated, actin dependent regulator of chromatin, subfamily d, member 1	6602	-0.801434	7.01072e-07
20544	ILMN_1679476	21	21q22.11	GART	phosphoribosylglycinamide formyltransferase, phosphoribosylglycinamide synthetase, phosphoribosylaminoimidazole synthetase	2618	-0.80041	2.30957e-06
4540725	ILMN_1739274	3	3p14.3	PDHB	pyruvate dehydrogenase E1 beta subunit	5162	-0.800299	5.85414e-09
2450187	ILMN_1694106	3	3p22.3	GPD1L	glycerol-3-phosphate dehydrogenase 1 like	23171	-0.799879	4.87813e-07
4010487	ILMN_2383774	14	14q32.32	TRAF3	TNF receptor associated factor 3	7187	-0.799857	0.00115439
5690228	ILMN_1655990	9	9q33.2	CDK5RAP2	CDK5 regulatory subunit associated protein 2	55755	-0.799503	8.86511e-05
7650376	ILMN_1782222	12	12q23.3	WASHC4	WASH complex subunit 4	23325	-0.799326	0.00279287
3460132	ILMN_1660793	16	16p13.3	PAQR4	progestin and adipoQ receptor family member 4	124222	-0.799185	8.41884e-06
5810070	ILMN_2155998	3	3p14.1	PSMD6	proteasome 26S subunit, non-ATPase 6	9861	-0.799081	3.21456e-06
1710189	ILMN_1808404	16	16p13.3	RHBDF1	rhomboid 5 homolog 1	64285	-0.798864	0.000949634
2850441	ILMN_1753885	20	20q13.33	YTHDF1	YTH N6-methyladenosine RNA binding protein 1	54915	-0.798664	4.68421e-07
4070068	ILMN_2265093	14	14q24.3	GPATCH2L	G-patch domain containing 2 like	55668	-0.798396	0.000404864
5820521	ILMN_2142979	1	1p21.3	PTBP2	polypyrimidine tract binding protein 2	58155	-0.798395	0.00270857
1240360	ILMN_1713966	14	14q11.2	MRPL52	mitochondrial ribosomal protein L52	122704	-0.797822	1.00315e-05
580470	ILMN_2135984	10	10p12.1	MASTL	microtubule associated serine/threonine kinase like	84930	-0.797609	0.000471308
4260093	ILMN_1655137	1	1p32.3	TUT4	terminal uridylyl transferase 4	23318	-0.797547	3.82645e-05
6590243	ILMN_1715804	17	17p13.3	PITPNA	phosphatidylinositol transfer protein alpha	5306	-0.797484	0.000620904
3360390	ILMN_1779470	11	11q23.3	ABCG4	ATP binding cassette subfamily G member 4	64137	-0.797276	0.00147375
6620437	ILMN_1753613	7	7p15.2	HOXA5	homeobox A5	3202	-0.797037	0.00012001
3370440	ILMN_2325112	22	22q13.31	CDPF1	cysteine rich DPF motif domain containing 1	150383	-0.796819	1.38471e-05
5090500	ILMN_2341595	12	12q21.32	KITLG	KIT ligand	4254	-0.796756	0.000478258
6760326	ILMN_1703435	9	9q21.11	ZNF658	zinc finger protein 658	26149	-0.795768	0.000840068
160292	ILMN_1664828	22	22q13.1	APOBEC3H	apolipoprotein B mRNA editing enzyme catalytic subunit 3H	164668	-0.794919	2.82117e-05
2480735	ILMN_3235104	11	11q21	CEP295	centrosomal protein 295	85459	-0.794731	0.000736024
2940564	ILMN_1694194	19	19q13.33	SCAF1	SR-related CTD associated factor 1	58506	-0.794675	0.00456156
5910615	ILMN_3244526	10	10q24.1	TCTN3	tectonic family member 3	26123	-0.794611	7.82306e-05
3360112	ILMN_1784661	9	9q21.13	CEMIP2	cell migration inducing hyaluronidase 2	23670	-0.794594	0.00100009
6280685	ILMN_1690695	15	15q26.1	PEX11A	peroxisomal biogenesis factor 11 alpha	8800	-0.794424	0.000192659
2940075	ILMN_1701386	2	2q33.1	STRADB	STE20-related kinase adaptor beta	55437	-0.794418	2.70065e-07
4540288	ILMN_1769027	1	1q21.3	CDC42SE1	CDC42 small effector 1	56882	-0.794323	1.5459e-05
1500703	ILMN_1707088	1	1p13.3-p13.2	DENND2D	DENN domain containing 2D	79961	-0.794111	1.37521e-05
2900035	ILMN_1682935	1	1q41	LYPLAL1	lysophospholipase like 1	127018	-0.793844	8.99758e-05
7400711	ILMN_1770719	17	17p13.3	CLUH	clustered mitochondria homolog	23277	-0.793644	0.00131
5290382	ILMN_1809147	22	22q13.31	FAM118A	family with sequence similarity 118 member A	55007	-0.793013	0.000327417
2570373	ILMN_1706593	12	12q12	PPHLN1	periphilin 1	51535	-0.792779	0.000237918
4230286	ILMN_1812856	20	20q13.12	ZSWIM1	zinc finger SWIM-type containing 1	90204	-0.792483	0.000186084
6560025	ILMN_1885165	NA	NA	NA	NA		-0.792301	0.00338576
2140064	ILMN_1746457	2	2p23.3	GTF3C2	general transcription factor IIIC subunit 2	2976	-0.7922	4.56842e-05
4250112	ILMN_1743677	1	1q44	HNRNPU	heterogeneous nuclear ribonucleoprotein U	3192	-0.79218	1.05239e-06
6450324	ILMN_1702764	10	10q23.32-q23.33	MARCH5	membrane associated ring-CH-type finger 5	54708	-0.79216	0.00337839
1070411	ILMN_1814281	2	2q24.3	SPC25	SPC25, NDC80 kinetochore complex component	57405	-0.791905	4.68288e-05
6560750	ILMN_1704342	7	7q36.3	UBE3C	ubiquitin protein ligase E3C	9690	-0.791648	1.46396e-06
4560482	ILMN_1702044	17	17p13.1	CNTROB	centrobin, centriole duplication and spindle assembly protein	116840	-0.79153	0.00949341
7320129	ILMN_1733045	22	22q11.23	RAB36	RAB36, member RAS oncogene family	9609	-0.791415	7.21217e-06
2030068	ILMN_1743427	1	1q24.2	SCYL3	SCY1 like pseudokinase 3	57147	-0.790898	0.000111755
4210653	ILMN_2140700	4	4p16.3	CRIPAK	cysteine rich PAK1 inhibitor	285464	-0.790757	0.00206828
6650554	ILMN_1828216	NA	NA	NA	NA		-0.790574	0.000137945
3170564	ILMN_1778951	6	6q21	C6orf203	chromosome 6 open reading frame 203	51250	-0.790415	3.80963e-05
6020209	ILMN_1779185	22	22q11.23	SPECC1L	sperm antigen with calponin homology and coiled-coil domains 1 like	23384	-0.79019	8.07979e-06
3870504	ILMN_1715181	19	19p13.11	ARRDC2	arrestin domain containing 2	27106	-0.79019	0.000170859
4760593	ILMN_1724789	11	11p13	CD59	CD59 molecule (CD59 blood group)	966	-0.789846	0.000382315
450082	ILMN_1797786	22	22q13.33	MAPK12	mitogen-activated protein kinase 12	6300	-0.789749	5.4758e-05
5310446	ILMN_2356031	11	11q13.4	RNF121	ring finger protein 121	55298	-0.7896	7.49004e-05
1990487	ILMN_1809086	3	3q23	XRN1	5'-3' exoribonuclease 1	54464	-0.78957	4.1487e-05
540204	ILMN_2175112	2	2p24.2	KCNS3	potassium voltage-gated channel modifier subfamily S member 3	3790	-0.789382	0.0198036
380050	ILMN_2373062	17	17q25.1	RHBDF2	rhomboid 5 homolog 2	79651	-0.789358	1.6166e-05
130300	ILMN_1663158	16	16p13.3	ZNF174	zinc finger protein 174	7727	-0.789324	0.000275948
6980475	ILMN_1738819	17	17q21.31	EFTUD2	elongation factor Tu GTP binding domain containing 2	9343	-0.789082	6.35727e-07
3370471	ILMN_1776493	8	8p22	MTUS1	microtubule associated scaffold protein 1	57509	-0.788715	0.000220762
1260136	ILMN_2290118	9	9q33.2	MEGF9	multiple EGF like domains 9	1955	-0.788647	0.0025645
3870608	ILMN_2393994	8	8q13.1-q13.2	CSPP1	centrosome and spindle pole associated protein 1	79848	-0.78862	7.00976e-05
6370392	ILMN_1676864	9	9q34.13	DDX31	DEAD-box helicase 31	64794	-0.788384	0.0008455
1070253	ILMN_1790062	5	5p15.2	OTULIN	OTU deubiquitinase with linear linkage specificity	90268	-0.787893	1.75423e-06
1300075	ILMN_1802257	17	17q22	PCTP	phosphatidylcholine transfer protein	58488	-0.787739	1.2394e-05
5420377	ILMN_1803788	14	14q22.3	LGALS3	galectin 3	3958	-0.787738	0.0051538
7400114	ILMN_2185563	5	5q13.2	ANKRA2	ankyrin repeat family A member 2	57763	-0.787575	0.000403381
3450739	ILMN_1730260	13	13q12.11	EEF1AKMT1	EEF1A lysine methyltransferase 1	221143	-0.787469	8.79803e-05
4670520	ILMN_1711703	16	16q22.1	C16orf70	chromosome 16 open reading frame 70	80262	-0.786968	9.0183e-05
2490577	ILMN_1755173	19	19q13.33	PLEKHA4	pleckstrin homology domain containing A4	57664	-0.786643	0.000181492
3390468	ILMN_1663220	5	5q33.2	MRPL22	mitochondrial ribosomal protein L22	29093	-0.786628	4.27567e-05
1440619	ILMN_3307887	22	22q12.2	PRR14L	proline rich 14 like	253143	-0.786502	1.28867e-07
1070091	ILMN_1680682	17	17q12	TADA2A	transcriptional adaptor 2A	6871	-0.786315	0.000169482
2570441	ILMN_2408102	22	22q12.1	TFIP11	tuftelin interacting protein 11	24144	-0.784957	2.74818e-05
3840463	ILMN_2194649	1	1q24.1	TADA1	transcriptional adaptor 1	117143	-0.784808	5.31245e-06
6110470	ILMN_1716445	2	2q37.3	DTYMK	deoxythymidylate kinase	1841	-0.784726	0.00322622
5550348	ILMN_1723021	1	1p36.31	ICMT	isoprenylcysteine carboxyl methyltransferase	23463	-0.784511	5.45762e-06
4890093	ILMN_2226324	6	6q27	MPC1	mitochondrial pyruvate carrier 1	51660	-0.784367	6.1659e-07
240097	ILMN_1651886	10	10q24.31	CWF19L1	CWF19 like cell cycle control factor 1	55280	-0.784029	1.57186e-08
2710475	ILMN_1743049	12	12q23.3	PWP1	PWP1 homolog, endonuclein	11137	-0.783572	1.18849e-06
4850164	ILMN_1666049	9	9q34.13	NUP214	nucleoporin 214	8021	-0.78334	0.000116148
5860020	ILMN_1671902	3	3p25.3	THUMPD3	THUMP domain containing 3	25917	-0.783337	0.000211959
7380327	ILMN_1771139	16	16q24.2	FBXO31	F-box protein 31	79791	-0.783186	0.000124877
510097	ILMN_1689336	7	7p15.2	HOXA10	homeobox A10	3206	-0.782962	0.000167655
1230523	ILMN_1690392	10	10p12.2	COMMD3	COMM domain containing 3	23412	-0.782892	1.61151e-08
1510278	ILMN_2401352	19	19p13.3	UHRF1	ubiquitin like with PHD and ring finger domains 1	29128	-0.782684	0.000588526
6180487	ILMN_1772957	22	22q12.3	FOXRED2	FAD dependent oxidoreductase domain containing 2	80020	-0.782481	0.000191559
5260044	ILMN_2093674	14	14q22.2	GMFB	glia maturation factor beta	2764	-0.782424	9.19284e-08
7510379	ILMN_2131523	13	13q12.12	SACS	sacsin molecular chaperone	26278	-0.781863	0.000727785
7570397	ILMN_1771135	16	16p12.1	ZKSCAN2	zinc finger with KRAB and SCAN domains 2	342357	-0.781693	0.000418717
5220204	ILMN_1750400	19	19p13.2	C19orf66	chromosome 19 open reading frame 66	55337	-0.781692	0.00428829
7040139	ILMN_1745784	19	19q13.43	ZNF324	zinc finger protein 324	25799	-0.781435	0.00114274
5910347	ILMN_1757230	8	8q24.3	ZNF250	zinc finger protein 250	58500	-0.781238	0.000196751
610358	ILMN_2075051	17	17q25.3	PGS1	phosphatidylglycerophosphate synthase 1	9489	-0.781104	8.05216e-05
60132	ILMN_1735499	3	c("3q12.1", "3")	DCBLD2	discoidin, CUB and LCCL domain containing 2	131566	-0.781092	8.75833e-06
3780148	ILMN_1730048	7	7p22.1	C7orf26	chromosome 7 open reading frame 26	79034	-0.780867	0.000141831
580053	ILMN_2129859	5	5p15.31	FASTKD3	FAST kinase domains 3	79072	-0.780366	0.000128704
6560390	ILMN_1748707	22	22q13.33	CRELD2	cysteine rich with EGF like domains 2	79174	-0.780189	7.67859e-07
6900278	ILMN_1709032	3	3p21.31	FYCO1	FYVE and coiled-coil domain containing 1	79443	-0.779957	3.60471e-08
6480390	ILMN_1675946	1	1q23.1	ISG20L2	interferon stimulated exonuclease gene 20 like 2	81875	-0.77993	0.000152172
1940326	ILMN_3249110	12	12q13.12	CSRNP2	cysteine and serine rich nuclear protein 2	81566	-0.779612	9.58721e-05
4880181	ILMN_1759464	1	1q42.2	SPRTN	SprT-like N-terminal domain	83932	-0.779576	4.13988e-06
6110767	ILMN_1805131	17	17q25.3	OXLD1	oxidoreductase like domain containing 1	339229	-0.779341	0.00846509
4220372	ILMN_1815010	11	c("11p15.4", "11p15")	RNF141	ring finger protein 141	50862	-0.779162	7.13529e-07
6130630	ILMN_2409754	22	22q13.31	PRR5	proline rich 5	55615	-0.778999	9.63648e-06
5900112	ILMN_1795922	17	17q12	ZNF830	zinc finger protein 830	91603	-0.778916	5.16917e-05
1010768	ILMN_1763147	9	9p21.1	NDUFB6	NADH:ubiquinone oxidoreductase subunit B6	4712	-0.778477	2.61814e-05
4230619	ILMN_1800602	2	2q24.2	GCA	grancalcin	25801	-0.778468	0.000233647
1470082	ILMN_1749634	4	4q31.3	PLRG1	pleiotropic regulator 1	5356	-0.778351	2.7642e-08
6130152	ILMN_1725750	NA	NA	NA	NA		-0.778112	0.00131649
70041	ILMN_1671742	13	13q34	UPF3A	UPF3A, regulator of nonsense mediated mRNA decay	65110	-0.77804	0.0149268
380689	ILMN_2412380	13	13q14.11	TSC22D1	TSC22 domain family member 1	8848	-0.778029	0.00278167
4850519	ILMN_1697503	5	5q11.2	DHX29	DExH-box helicase 29	54505	-0.777957	3.61802e-05
6200672	ILMN_1665291	7	7q36.1	NUB1	negative regulator of ubiquitin like proteins 1	51667	-0.777693	1.78608e-05
4070289	ILMN_1747241	2	2q14.3	IWS1	IWS1, SUPT6H interacting protein	55677	-0.777124	2.35437e-05
2340528	ILMN_1652008	15	15q15.1	KNSTRN	kinetochore localized astrin (SPAG5) binding protein	90417	-0.777045	5.8904e-06
60706	ILMN_2380850	9	9q34.3	ENTR1	endosome associated trafficking regulator 1	10807	-0.776881	0.000159285
1500300	ILMN_1654866	2	2q13	RANBP2	RAN binding protein 2	5903	-0.776419	2.86096e-05
3440348	ILMN_1666933	8	8p11.23	ASH2L	ASH2 like, histone lysine methyltransferase complex subunit	9070	-0.776406	2.38998e-06
3990224	ILMN_1765109	1	1p36.31	TNFRSF25	TNF receptor superfamily member 25	8718	-0.776397	0.0479103
4150692	ILMN_1691731	3	3q21.1	PARP14	poly(ADP-ribose) polymerase family member 14	54625	-0.776384	0.000532998
1940064	ILMN_1736548	1	1p35.3	PHACTR4	phosphatase and actin regulator 4	65979	-0.776138	1.25491e-05
450243	ILMN_2300636	22	22q12.3	HMGXB4	HMG-box containing 4	10042	-0.776003	0.000764281
3310358	ILMN_1669607	16	16p11.2	PHKG2	phosphorylase kinase catalytic subunit gamma 2	5261	-0.775102	0.00437527
1740192	ILMN_1906158	10	10q24.33	STN1	STN1, CST complex subunit	79991	-0.774999	0.000101321
4590537	ILMN_1718706	17	17q11.2	ERAL1	Era like 12S mitochondrial rRNA chaperone 1	26284	-0.774971	1.17524e-06
4390450	ILMN_1702487	6	6q23.2	SGK1	serum/glucocorticoid regulated kinase 1	6446	-0.774797	0.0022361
6960192	ILMN_3249419	4	4q26	LINC01061	long intergenic non-protein coding RNA 1061	401149	-0.774504	0.0041524
5720300	ILMN_2344455	5	5q33.1	G3BP1	G3BP stress granule assembly factor 1	10146	-0.774409	0.000908358
5700296	ILMN_1763568	10	10q24.1	ZDHHC16	zinc finger DHHC-type containing 16	84287	-0.77437	5.40698e-07
2900121	ILMN_1804090	17	17q25.3	SLC25A10	solute carrier family 25 member 10	1468	-0.774285	0.00727666
5420050	ILMN_3266186	12	12q13.11	HDAC7	histone deacetylase 7	51564	-0.773799	0.000258632
3990465	ILMN_1750160	5	5p15.31	FASTKD3	FAST kinase domains 3	79072	-0.773733	1.5173e-06
670711	ILMN_1737025	3	3p24.3	PLCL2	phospholipase C like 2	23228	-0.773441	0.0019445
4760647	ILMN_1699451	X	Xq28	CCNQ	cyclin Q	92002	-0.773419	0.000357841
4570296	ILMN_1664243	19	19p13.11	USE1	unconventional SNARE in the ER 1	55850	-0.77313	0.000330515
540255	ILMN_1674698	6	6p21.1	AARS2	alanyl-tRNA synthetase 2, mitochondrial	57505	-0.772978	0.00167312
4780129	ILMN_1664516	1	1q41	CENPF	centromere protein F	1063	-0.772901	0.00142659
6760673	ILMN_1655663	17	17q21.2	P3H4	prolyl 3-hydroxylase family member 4 (non-enzymatic)	10609	-0.772742	0.00347876
7610433	ILMN_1707720	19	19q13.32	SLC1A5	solute carrier family 1 member 5	6510	-0.772704	2.98348e-05
1980204	ILMN_1903021	NA	NA	NA	NA		-0.77265	0.000738501
6180543	ILMN_1673892	3	3q23	GK5	glycerol kinase 5	256356	-0.772604	0.00042989
460280	ILMN_1767892	1	1q23.3	DUSP12	dual specificity phosphatase 12	11266	-0.77243	5.91161e-05
5560411	ILMN_1684964	7	7q36.1	ZNF212	zinc finger protein 212	7988	-0.771677	8.72088e-06
1780070	ILMN_1656540	3	3q21.3	RUVBL1	RuvB like AAA ATPase 1	8607	-0.771571	0.000363723
7320181	ILMN_1758412	12	12p13.31	COPS7A	COP9 signalosome subunit 7A	50813	-0.771432	1.88587e-06
3440025	ILMN_1730504	6	6q26	AGPAT4	1-acylglycerol-3-phosphate O-acyltransferase 4	56895	-0.771231	0.00540429
770037	ILMN_2061310	X	Xq26.1	ZNF280C	zinc finger protein 280C	55609	-0.771179	3.39942e-06
20653	ILMN_1743402	14	14q23.1	SIX4	SIX homeobox 4	51804	-0.77113	9.74208e-05
5090414	ILMN_1687403	22	22q11.21	MRPL40	mitochondrial ribosomal protein L40	64976	-0.770787	0.000288913
7160246	ILMN_1687921	16	16p13.3	JMJD8	jumonji domain containing 8	339123	-0.77032	2.45269e-06
1340253	ILMN_1788738	22	22q12.1	ZNRF3	zinc and ring finger 3	84133	-0.770253	0.00175625
6650044	ILMN_1767579	12	12q21.2	KRR1	KRR1, small subunit processome component homolog	11103	-0.769742	0.0160065
4230520	ILMN_1795227	12	12q24.31	DYNLL1	dynein light chain LC8-type 1	8655	-0.769461	7.39584e-07
110348	ILMN_1676058	12	12p13.2	MAGOHB	mago homolog B, exon junction complex subunit	55110	-0.768943	1.92151e-06
6330044	ILMN_1703791	10	10q22.2	ANXA7	annexin A7	310	-0.768458	5.12925e-06
1500609	ILMN_1800308	6	6p21.33	GTF2H4	general transcription factor IIH subunit 4	2968	-0.768426	0.00110887
20465	ILMN_1800197	5	5p15.33	MRPL36	mitochondrial ribosomal protein L36	64979	-0.768108	0.000300746
520451	ILMN_1818149	NA	NA	NA	NA		-0.767927	0.0243565
1030358	ILMN_1783815	16	16p12.2	COG7	component of oligomeric golgi complex 7	91949	-0.767474	0.00247352
5050376	ILMN_1737588	21	21q22.3	GATD3A	glutamine amidotransferase like class 1 domain containing 3A	8209	-0.767054	6.49188e-10
4260017	ILMN_2415529	9	9q33.2	CDK5RAP2	CDK5 regulatory subunit associated protein 2	55755	-0.766911	0.000517152
1030167	ILMN_2258816	6	6q23.1	SAMD3	sterile alpha motif domain containing 3	154075	-0.766732	0.00257441
1570484	ILMN_1669113	19	19q13.33	ATF5	activating transcription factor 5	22809	-0.766456	0.00156935
1710674	ILMN_1659462	1	1q23.2	DUSP23	dual specificity phosphatase 23	54935	-0.766094	9.94168e-05
670561	ILMN_1707901	17	17p11.2	DHRS7B	dehydrogenase/reductase 7B	25979	-0.765439	2.41916e-05
2030735	ILMN_1708223	15	15q15.1	PAK6	p21 (RAC1) activated kinase 6	56924	-0.765373	0.00756508
3390192	ILMN_1812571	12	12q24.23	RAB35	RAB35, member RAS oncogene family	11021	-0.765299	2.64957e-06
2140189	ILMN_1732767	12	12q24.31	PSMD9	proteasome 26S subunit, non-ATPase 9	5715	-0.765283	0.00333682
2450452	ILMN_1680925	17	17q25.1	SLC9A3R1	SLC9A3 regulator 1	9368	-0.765203	8.53468e-07
5550204	ILMN_1797828	20	20p13	DDRGK1	DDRGK domain containing 1	65992	-0.765201	2.73846e-05
4060327	ILMN_1783546	13	13q34	NAXD	NAD(P)HX dehydratase	55739	-0.764807	1.86438e-05
730292	ILMN_3299905	12	12q24.22	RNFT2	ring finger protein, transmembrane 2	84900	-0.764708	0.000278171
6110484	ILMN_1663383	5	5q33.2	GEMIN5	gem nuclear organelle associated protein 5	25929	-0.764618	9.85239e-06
6330201	ILMN_1724832	20	20p11.23	OVOL2	ovo like zinc finger 2	58495	-0.76453	0.000114481
4260722	ILMN_1727479	1	1p36.32	TPRG1L	tumor protein p63 regulated 1 like	127262	-0.764366	4.41514e-05
1170497	ILMN_3245471	17	17q23.2	SCARNA20	small Cajal body-specific RNA 20	677681	-0.764325	0.00134341
3440403	ILMN_1789535	1	1p36.11	DHDDS	dehydrodolichyl diphosphate synthase subunit	79947	-0.76428	0.00046983
2940452	ILMN_1826531	12	12q21.1	ATXN7L3B	ataxin 7 like 3B	552889	-0.764195	4.94436e-05
5550465	ILMN_1812557	17	17q21.32	CDK5RAP3	CDK5 regulatory subunit associated protein 3	80279	-0.764116	0.00332636
2370546	ILMN_1694126	9	9p13.3	KIF24	kinesin family member 24	347240	-0.763883	0.000908955
2510220	ILMN_1745374	17	17q21.31	IFI35	interferon induced protein 35	3430	-0.763718	0.000214563
4070367	ILMN_2352448	7	7q11.23	NSUN5P1	NOP2/Sun RNA methyltransferase family member 5 pseudogene 1	155400	-0.763455	0.00120788
450341	ILMN_1744574	10	10q25.3	TRUB1	TruB pseudouridine synthase family member 1	142940	-0.763394	0.00264395
3850504	ILMN_1705602	1	1p36.33	KLHL17	kelch like family member 17	339451	-0.763335	0.0462467
6060201	ILMN_1756220	2	2q14.1	DDX18	DEAD-box helicase 18	8886	-0.763159	8.0819e-06
7400554	ILMN_1694479	19	19p13.3	WDR18	WD repeat domain 18	57418	-0.762925	2.73683e-06
520630	ILMN_1669281	16	16p12.1	CLN3	CLN3, battenin	1201	-0.762894	0.0013196
1740494	ILMN_1683475	19	19q13.32	TOMM40	translocase of outer mitochondrial membrane 40	10452	-0.762713	1.02118e-07
6900044	ILMN_1750880	12	12p11.21	AMN1	antagonist of mitotic exit network 1 homolog	196394	-0.762288	0.00017168
160142	ILMN_2116594	1	1q21.2	GPR89B	G protein-coupled receptor 89B	51463	-0.762123	0.00255525
3360446	ILMN_1843949	NA	NA	NA	NA		-0.76192	0.012768
60202	ILMN_1718044	17	17p12	ELAC2	elaC ribonuclease Z 2	60528	-0.761574	0.000457389
4010386	ILMN_1791949	6	6p22.1	PGBD1	piggyBac transposable element derived 1	84547	-0.761546	6.77242e-05
1170332	ILMN_1688755	2	2p13.3	AAK1	AP2 associated kinase 1	22848	-0.761295	0.0327802
6860709	ILMN_1812353	8	8q13.1-q13.2	CSPP1	centrosome and spindle pole associated protein 1	79848	-0.760611	0.00481333
6980487	ILMN_1754860	19	19q13.2	MRPS12	mitochondrial ribosomal protein S12	6183	-0.759809	0.00128775
3440544	ILMN_2128923	X	Xp22.2	HCCS	holocytochrome c synthase	3052	-0.759753	0.00877304
4210754	ILMN_1773968	1	1p31.3	SERBP1	SERPINE1 mRNA binding protein 1	26135	-0.759731	8.55539e-06
450114	ILMN_1673370	4	4p15.32	FBXL5	F-box and leucine rich repeat protein 5	26234	-0.758912	2.42519e-05
3990600	ILMN_1758674	17	17p13.2	EMC6	ER membrane protein complex subunit 6	83460	-0.75832	3.10279e-06
3180253	ILMN_1778168	20	20q13.12	ELMO2	engulfment and cell motility 2	63916	-0.758292	0.00017533
1050050	ILMN_1719998	9	9q33.3	MIR600HG	MIR600 host gene	81571	-0.758243	0.00495886
7380142	ILMN_2140510	X	Xq24	KLHL13	kelch like family member 13	90293	-0.758127	0.000811931
3190470	ILMN_1789123	4	4q28.1	PLK4	polo like kinase 4	10733	-0.758009	1.99286e-05
1230112	ILMN_1651769	5	5q14.1	ZFYVE16	zinc finger FYVE-type containing 16	9765	-0.757762	0.0013577
1260315	ILMN_1785336	16	16p13.2	PMM2	phosphomannomutase 2	5373	-0.757691	0.00011239
3450113	ILMN_1809323	9	9q31.1	TMEM246	transmembrane protein 246	84302	-0.757616	0.000125836
3830519	ILMN_1718718	20	20p12.2	MKKS	McKusick-Kaufman syndrome	8195	-0.757304	9.81697e-07
4590646	ILMN_1760400	8	8p12	TTI2	TELO2 interacting protein 2	80185	-0.756889	7.04762e-09
1110722	ILMN_2155172	5	5p13.2	BRIX1	BRX1, biogenesis of ribosomes	55299	-0.756859	1.28515e-06
630341	ILMN_1792733	19	19q13.32	FOXA3	forkhead box A3	3171	-0.756755	3.86812e-05
4850500	ILMN_1727633	3	3q13.13	NECTIN3	nectin cell adhesion molecule 3	25945	-0.756648	0.00456109
70601	ILMN_1749629	7	7q36.1	CUL1	cullin 1	8454	-0.756638	2.29287e-06
1780538	ILMN_1806349	X	Xq28	SLC6A8	solute carrier family 6 member 8	6535	-0.756523	0.00246104
4670020	ILMN_1720344	15	15q11.2	NIPA2	NIPA magnesium transporter 2	81614	-0.756463	1.0857e-08
5910543	ILMN_1738656	17	17p13.3	GLOD4	glyoxalase domain containing 4	51031	-0.756036	7.63105e-05
2970167	ILMN_1688070	NA	NA	NA	NA		-0.756024	0.0447996
6180259	ILMN_1791280	12	12q24.23	HSPB8	heat shock protein family B (small) member 8	26353	-0.755956	0.000887107
6450646	ILMN_1745385	19	19p13.2	HNRNPM	heterogeneous nuclear ribonucleoprotein M	4670	-0.755494	2.26127e-06
5360424	ILMN_1702501	6	6q27	RPS6KA2	ribosomal protein S6 kinase A2	6196	-0.755485	0.00297955
1580341	ILMN_2281069	1	1q22-q23.1	GPATCH4	G-patch domain containing 4	54865	-0.75508	0.0104023
6620017	ILMN_1681780	10	10p12.1	MKX	mohawk homeobox	283078	-0.754879	9.4603e-05
6940209	ILMN_1785574	2	2p13.1	HTRA2	HtrA serine peptidase 2	27429	-0.754365	0.000593708
670296	ILMN_1815130	22	22q13.1	MICALL1	MICAL like 1	85377	-0.754131	0.00188181
240373	ILMN_2315289	1	1p36.32	PEX10	peroxisomal biogenesis factor 10	5192	-0.753761	0.00704249
1440243	ILMN_1719661	16	16p13.3	MSRB1	methionine sulfoxide reductase B1	51734	-0.753726	5.57033e-07
50114	ILMN_1799516	10	10q22.2	DNAJC9	DnaJ heat shock protein family (Hsp40) member C9	23234	-0.753549	1.27169e-07
6450647	ILMN_1718424	8	8q21.13	MRPS28	mitochondrial ribosomal protein S28	28957	-0.753481	0.000600475
1940605	ILMN_1711166	1	1p36.32	WRAP73	WD repeat containing, antisense to TP73	49856	-0.753443	1.49618e-08
3290341	ILMN_1668408	X	Xq26.1	AIFM1	apoptosis inducing factor mitochondria associated 1	9131	-0.753245	6.97338e-05
4570543	ILMN_1767691	17	17q21.2	VPS25	vacuolar protein sorting 25 homolog	84313	-0.753186	0.00350593
5700707	ILMN_1804277	15	15q14	SPRED1	sprouty related EVH1 domain containing 1	161742	-0.75298	8.87655e-07
1410243	ILMN_1769031	1	1p36.22	MTOR	mechanistic target of rapamycin kinase	2475	-0.752509	5.46253e-05
50129	ILMN_1651776	16	16q22.1	FHOD1	formin homology 2 domain containing 1	29109	-0.752507	0.000314604
150193	ILMN_3249456	NA	NA	NA	NA		-0.752107	0.00347889
870041	ILMN_1799969	1	1q21.3	SNAPIN	SNAP associated protein	23557	-0.752075	1.95047e-05
3800068	ILMN_1655921	3	3q13.33	GTF2E1	general transcription factor IIE subunit 1	2960	-0.751624	5.00808e-05
3990152	ILMN_2400322	1	1q32.1	DYRK3	dual specificity tyrosine phosphorylation regulated kinase 3	8444	-0.751263	1.27101e-05
1340739	ILMN_3231638	10	10q25.3	FAM160B1	family with sequence similarity 160 member B1	57700	-0.750995	0.000283735
6280037	ILMN_1762678	17	17q21.31	NMT1	N-myristoyltransferase 1	4836	-0.750896	0.000362034
990598	ILMN_1771966	10	10q26.2	BCCIP	BRCA2 and CDKN1A interacting protein	56647	-0.750554	1.22236e-05
770019	ILMN_1700766	19	19q13.43	ZNF324B	zinc finger protein 324B	388569	-0.75048	7.14024e-05
2940373	ILMN_1770084	8	8p11.22	TACC1	transforming acidic coiled-coil containing protein 1	6867	-0.750411	2.29449e-05
5340100	ILMN_1812777	2	2p11.2	MRPL35	mitochondrial ribosomal protein L35	51318	-0.750394	1.633e-05
4390136	ILMN_2379469	7	7p22.3	EIF3B	eukaryotic translation initiation factor 3 subunit B	8662	-0.750198	3.29303e-07
1780450	ILMN_1806705	9	9q34.11	ASB6	ankyrin repeat and SOCS box containing 6	140459	-0.749844	0.00324505
3370450	ILMN_1734483	1	1p35.1	BSDC1	BSD domain containing 1	55108	-0.749748	7.13488e-05
2810451	ILMN_1763196	15	15q21.3	WDR72	WD repeat domain 72	256764	-0.749521	4.03157e-05
6520139	ILMN_1723123	4	4p16.3	FGFR3	fibroblast growth factor receptor 3	2261	-0.749423	1.78882e-05
6620056	ILMN_1768077	10	10q24.1	TCTN3	tectonic family member 3	26123	-0.749322	6.40218e-06
2630626	ILMN_1655734	1	1p22.3	RPF1	ribosome production factor 1 homolog	80135	-0.74923	3.25641e-05
360673	ILMN_1788211	11	11q24.3-q25	SNX19	sorting nexin 19	399979	-0.748807	0.00169446
3940079	ILMN_2184612	3	3q13.2	C3orf52	chromosome 3 open reading frame 52	79669	-0.748684	1.81502e-05
2710427	ILMN_3243966	X	Xp22.11	SCARNA23	small Cajal body-specific RNA 23	677773	-0.748166	4.71509e-05
4280603	ILMN_2055700	4	4p16.3	SLBP	stem-loop binding protein	7884	-0.747994	7.78805e-05
2120544	ILMN_1733696	15	15q24.2	IMP3	IMP3, U3 small nucleolar ribonucleoprotein	55272	-0.747933	9.18611e-08
3940152	ILMN_1660379	22	22q13.31	CDPF1	cysteine rich DPF motif domain containing 1	150383	-0.747895	0.0072051
1190445	ILMN_1721128	20	20q13.12	TOMM34	translocase of outer mitochondrial membrane 34	10953	-0.747735	1.67358e-06
6590592	ILMN_1815308	2	2p24.1	SDC1	syndecan 1	6382	-0.747728	3.06024e-06
4200204	ILMN_1799320	9	9q34.3	ARRDC1-AS1	ARRDC1 antisense RNA 1	85026	-0.74761	0.00953768
3060682	ILMN_2352921	7	7q33	BPGM	bisphosphoglycerate mutase	669	-0.747198	0.0029307
1820471	ILMN_1791052	6	6p21.32	FKBPL	FK506 binding protein like	63943	-0.746896	0.0141363
6220161	ILMN_1741392	3	3p21.31	SLC25A20	solute carrier family 25 member 20	788	-0.746804	0.00091548
4850673	ILMN_1774860	8	8q24.11	UTP23	UTP23, small subunit processome component	84294	-0.74675	0.00018334
3930189	ILMN_1768470	3	3q27.1	EIF4G1	eukaryotic translation initiation factor 4 gamma 1	1981	-0.746002	0.000595018
4850735	ILMN_1771949	18	18q11.2	TAF4B	TATA-box binding protein associated factor 4b	6875	-0.745712	0.00428658
290593	ILMN_2105919	4	4q28.1	FGF2	fibroblast growth factor 2	2247	-0.745574	0.000714571
2810687	ILMN_1678998	8	8q24.3	LRRC14	leucine rich repeat containing 14	9684	-0.745497	9.16566e-05
1030136	ILMN_1687571	NA	NA	NA	NA		-0.745365	0.0017136
3180348	ILMN_1651949	1	1q24.2	SCYL3	SCY1 like pseudokinase 3	57147	-0.745295	0.000988564
5700747	ILMN_1695604	6	6q22.1	DCBLD1	discoidin, CUB and LCCL domain containing 1	285761	-0.744988	0.00641282
110561	ILMN_2206344	10	10q22.2	NDST2	N-deacetylase and N-sulfotransferase 2	8509	-0.744645	1.5807e-05
1470068	ILMN_1741841	8	8q22.1	VIRMA	vir like m6A methyltransferase associated	25962	-0.74448	0.000407436
1240592	ILMN_1741475	7	7q22.1	PPP1R35	protein phosphatase 1 regulatory subunit 35	221908	-0.744008	0.000487067
6420161	ILMN_1693538	2	2q35	STK36	serine/threonine kinase 36	27148	-0.743967	0.0126479
1580215	ILMN_2352216	8	8q24.3	FBXL6	F-box and leucine rich repeat protein 6	26233	-0.743929	0.00478862
6290537	ILMN_2057220	8	8q22.2	RIDA	reactive intermediate imine deaminase A homolog	10247	-0.742952	0.0111685
4230053	ILMN_1686929	1	1p36.11	GPATCH3	G-patch domain containing 3	63906	-0.74232	0.00305584
1170121	ILMN_2352042	19	19p13.2	MRPL4	mitochondrial ribosomal protein L4	51073	-0.742179	0.00178529
1050367	ILMN_2402972	17	17q25.1	GGA3	golgi associated, gamma adaptin ear containing, ARF binding protein 3	23163	-0.741965	0.000319752
20601	ILMN_1801605	2	2p22.3	BIRC6	baculoviral IAP repeat containing 6	57448	-0.741474	6.79035e-05
2260703	ILMN_1781360	16	16q23.3	MPHOSPH6	M-phase phosphoprotein 6	10200	-0.74134	0.00102497
6040181	ILMN_2328378	7	7p15.3	OSBPL3	oxysterol binding protein like 3	26031	-0.74126	0.000116589
1240242	ILMN_3240389	3	3q11.2	CPOX	coproporphyrinogen oxidase	1371	-0.741069	1.46709e-06
1470632	ILMN_1797384	10	10q26.2	UROS	uroporphyrinogen III synthase	7390	-0.741015	1.27263e-05
1740504	ILMN_1784227	12	12q13.12	MCRS1	microspherule protein 1	10445	-0.740739	1.78963e-06
5570445	ILMN_1692664	22	22q13.31	PRR5	proline rich 5	55615	-0.740317	0.00033529
1170564	ILMN_1806122	14	14q11.2	CHD8	chromodomain helicase DNA binding protein 8	57680	-0.740303	0.000344749
2970672	ILMN_3241218	7	7q21.2	ANKIB1	ankyrin repeat and IBR domain containing 1	54467	-0.739917	0.000286531
4120131	ILMN_1673521	19	19p13.3	KISS1R	KISS1 receptor	84634	-0.739851	0.000821785
5340747	ILMN_2101810	10	10p11.22	ARHGAP12	Rho GTPase activating protein 12	94134	-0.739793	0.00351518
2000102	ILMN_1771264	15	15q15.3	ELL3	elongation factor for RNA polymerase II 3	80237	-0.739656	1.19805e-05
7330674	ILMN_2222008	6	6p21.32	KIFC1	kinesin family member C1	3833	-0.739253	0.000141271
4200162	ILMN_1796235	16	16q22.1	UTP4	UTP4, small subunit processome component	84916	-0.739145	1.4607e-07
5570300	ILMN_1671905	10	10q25.1	SFR1	SWI5 dependent homologous recombination repair protein 1	119392	-0.739014	0.00145555
580184	ILMN_1732985	8	8q24.22	PHF20L1	PHD finger protein 20 like 1	51105	-0.738621	0.00113327
4540376	ILMN_1752510	4	4q22.1	FAM13A	family with sequence similarity 13 member A	10144	-0.738112	1.845e-05
1260438	ILMN_1727142	8	8p11.21	IKBKB	inhibitor of nuclear factor kappa B kinase subunit beta	3551	-0.738044	0.00968864
1470561	ILMN_1773780	16	16p13.3	FAM173A	family with sequence similarity 173 member A	65990	-0.738021	0.00113842
430609	ILMN_3242091	9	9q34.2	BRD3OS	BRD3 opposite strand	266655	-0.737423	0.00011305
[truncated: 2,709 more rows]

## Sheet: siTRAP1 20%O2 vs. siNEG 20%O2
Table SII. Continued.
row.names	Ill_ID	Chr	Band	Symbol	Name	EntrezID	logFC	P-value
4670092	ILMN_1699737	16	16p13.3	TRAP1	TNF receptor associated protein 1	10131	-1.57719	1.06616e-11
4280017	ILMN_1669523	14	14q24.3	FOS	Fos proto-oncogene, AP-1 transcription factor subunit	2353	-1.13948	0.000809037
730142	ILMN_1677906	NA	NA	NA	NA		-1.08413	0.000136701
7000669	ILMN_1653161	10	10q23.2	SNCG	synuclein gamma	6623	-1.02515	0.00379463
20546	ILMN_1723042	7	7q11.23	CLDN3	claudin 3	1365	-0.931984	0.000924172
4590403	ILMN_1720430	20	20q13.33	PPDPF	pancreatic progenitor cell differentiation and proliferation factor	79144	-0.922778	0.0262304
6580039	ILMN_1672650	15	15q23	PKM	pyruvate kinase M1/2	5315	-0.900924	0.00753765
6280240	ILMN_1737163	1	1p36.11	SH3BGRL3	SH3 domain binding glutamate rich protein like 3	83442	-0.888281	1.41258e-05
7570324	ILMN_1732296	1	1p36.12	ID3	inhibitor of DNA binding 3, HLH protein	3399	-0.854409	0.000218875
830619	ILMN_1676984	12	12q13.3	DDIT3	DNA damage inducible transcript 3	1649	-0.852669	5.02084e-05
4780735	ILMN_1755215	6	6q24.3	SAMD5	sterile alpha motif domain containing 5	389432	-0.848052	0.000160736
2850639	ILMN_2400512	19	19p13.2	PRKCSH	protein kinase C substrate 80K-H	5589	-0.84599	0.00165158
2650136	ILMN_2124386	6	6p21.32	RGL2	ral guanine nucleotide dissociation stimulator like 2	5863	-0.828924	8.29294e-05
4040136	ILMN_2413572	11	11q13.1	MARK2	microtubule affinity regulating kinase 2	2011	-0.804305	0.00290073
1340463	ILMN_2377991	6	c("6p22.1", "6p22.3-p22.1")	ZSCAN31	zinc finger and SCAN domain containing 31	64288	-0.799466	0.000898755
1230289	ILMN_2356786	4	4p16.3	ADD1	adducin 1	118	-0.799059	6.64395e-06
1660296	ILMN_2086095	2	2p25.1	ID2	inhibitor of DNA binding 2	3398	-0.798136	0.000598286
4120671	ILMN_2361163	1	1p32.3	SSBP3	single stranded DNA binding protein 3	23648	-0.790889	0.00114051
2690279	ILMN_1679984	X	Xq24	ZCCHC12	zinc finger CCHC-type containing 12	170261	-0.782697	4.58031e-06
2320707	ILMN_1746492	22	22q12.3	IFT27	intraflagellar transport 27	11020	-0.778007	3.28893e-06
2320022	ILMN_1905072	NA	NA	NA	NA		-0.768426	4.96958e-05
3800047	ILMN_1792473	6	6p21.33	AIF1	allograft inflammatory factor 1	199	-0.766017	0.00461953
60221	ILMN_2399497	19	19p13.11	RFXANK	regulatory factor X associated ankyrin containing protein	8625	-0.763172	0.0018641
870338	ILMN_1762899	5	5q31.2	EGR1	early growth response 1	1958	-0.751257	0.00174134
6770204	ILMN_2340877	11	11q13.1	MEN1	menin 1	4221	-0.744718	2.7947e-05
3930414	ILMN_1780292	NA	NA	NA	NA		-0.740387	0.0102587
1260086	ILMN_1793990	2	2p25.1	ID2	inhibitor of DNA binding 2	3398	-0.733336	0.000662581
2030093	ILMN_1775327	15	15q23	PKM	pyruvate kinase M1/2	5315	-0.727438	0.0124962
7150292	ILMN_1695946	1	1p36.11	TRNP1	TMF1-regulated nuclear protein 1	388610	-0.727214	6.77501e-06
3370750	ILMN_1758717	17	17q11.2	SUPT6H	SPT6 homolog, histone chaperone	6830	-0.725401	0.00497336
4560021	ILMN_3238001	NA	NA	NA	NA		-0.723138	0.0138341
520008	ILMN_1766560	5	5q31.3	ANKHD1-EIF4EBP3	ANKHD1-EIF4EBP3 readthrough	404734	-0.718522	0.000110372
3450273	ILMN_2381296	14	14q24.3	GSTZ1	glutathione S-transferase zeta 1	2954	-0.716065	0.000126256
1030376	ILMN_2382906	20	20q12	PLCG1	phospholipase C gamma 1	5335	-0.714796	6.57654e-06
10392	ILMN_1753404	12	12p13.31	LRRC23	leucine rich repeat containing 23	10233	-0.711444	0.0026229
2260280	ILMN_1764617	17	17q21.31	GPATCH8	G-patch domain containing 8	23131	-0.7106	0.00629555
2370576	ILMN_1766359	1	1q21.3	GATAD2B	GATA zinc finger domain containing 2B	57459	-0.71012	0.000964529
4760338	ILMN_2338323	20	20p13	CDC25B	cell division cycle 25B	994	-0.708936	1.96428e-06
5960240	ILMN_3248247	7	7p14.1	LINC00265	long intergenic non-protein coding RNA 265	349114	-0.704824	0.00527508
6840324	ILMN_2130180	12	12p13.31	RPL13P5	ribosomal protein L13 pseudogene 5	283345	-0.701232	0.00312218
5090192	ILMN_1724064	7	7p15.3	RPS2P32	ribosomal protein S2 pseudogene 32	256355	-0.69944	0.0192569
6290187	ILMN_2337492	11	11q13.2	RCE1	Ras converting CAAX endopeptidase 1	9986	-0.697469	0.00369278
1440114	ILMN_1693560	6	6p21.31	HMGA1	high mobility group AT-hook 1	3159	-0.694483	0.044047
6290678	ILMN_1709800	7	7q11.23	POMZP3	POM121 and ZP3 fusion	22932	-0.692949	0.000610681
1980608	ILMN_1779241	16	16p12.2	CRYM	crystallin mu	1428	-0.692653	5.11036e-05
3610139	ILMN_1668134	1	1p13.3	GSTM1	glutathione S-transferase mu 1	2944	-0.690539	0.000965769
630152	ILMN_1791545	17	17q21.2	KRT23	keratin 23	25984	-0.689963	0.00117874
7000220	ILMN_2373377	19	19q13.32	RTN2	reticulon 2	6253	-0.688857	0.00482909
1410475	ILMN_1775183	17	17q25.3	CBX8	chromobox 8	57332	-0.688648	0.00365668
670341	ILMN_1704043	2	2q37.3	PRR21	proline rich 21	643905	-0.685984	0.0234241
3130326	ILMN_2325394	NA	NA	NA	NA		-0.685727	0.0168507
1410204	ILMN_1721963	11	11q13.1	MEN1	menin 1	4221	-0.681214	0.00466445
3460376	ILMN_1749115	19	19q13.32	RTN2	reticulon 2	6253	-0.67775	0.00075095
2490452	ILMN_1765801	17	17q25.3	GAA	glucosidase alpha, acid	2548	-0.669164	0.0155986
6480722	ILMN_3244960	19	19p13.13	NACC1	nucleus accumbens associated 1	112939	-0.667994	0.0329654
5050193	ILMN_1746138	16	16q22.1	CARMIL2	capping protein regulator and myosin 1 linker 2	146206	-0.667515	0.00191579
4260398	ILMN_1815882	12	12q13.13	HNRNPA1	heterogeneous nuclear ribonucleoprotein A1	3178	-0.665917	0.00367511
6290673	ILMN_1779064	11	11q13.2	KLC2	kinesin light chain 2	64837	-0.663519	0.0142298
4810646	ILMN_2155272	15	15q22.31	PIF1	PIF1 5'-to-3' DNA helicase	80119	-0.659624	0.00398796
2000328	ILMN_2378708	7	7q22.1	TAF6	TATA-box binding protein associated factor 6	6878	-0.656726	0.0130798
4220754	ILMN_2373830	12	12p13.31	ATN1	atrophin 1	1822	-0.655347	0.00468067
5360041	ILMN_1770787	6	6p21.33	DDAH2	dimethylarginine dimethylaminohydrolase 2	23564	-0.655162	0.00992258
3450463	ILMN_2184064	15	15q26.2	ARRDC4	arrestin domain containing 4	91947	-0.655082	0.000217972
7550500	ILMN_2086077	19	19p13.13	JUNB	JunB proto-oncogene, AP-1 transcription factor subunit	3726	-0.653528	0.000905994
1740364	ILMN_1739253	2	2p13.1	STAMBP	STAM binding protein	10617	-0.646666	8.24969e-06
6650743	ILMN_1657554	X	Xp11.22	TSPYL2	TSPY like 2	64061	-0.645945	0.00110242
7380427	ILMN_1782993	16	16q22.2	DHODH	dihydroorotate dehydrogenase (quinone)	1723	-0.642256	0.000194313
1440438	ILMN_1658821	19	19p13.12	SAMD1	sterile alpha motif domain containing 1	90378	-0.639237	0.0283383
6330132	ILMN_1659913	15	15q26.1	ISG20	interferon stimulated exonuclease gene 20	3669	-0.631079	0.00214853
3290577	ILMN_1678086	2	2q21.1	CCDC74A	coiled-coil domain containing 74A	90557	-0.629297	0.000313604
4390543	ILMN_1737833	12	12p13.31	ATN1	atrophin 1	1822	-0.629059	0.0138237
1780360	ILMN_3273641	6	6p21.32	ATF6B	activating transcription factor 6 beta	1388	-0.627304	0.019693
2710142	ILMN_1755620	9	9q34.11	IER5L	immediate early response 5 like	389792	-0.626795	0.004707
4610044	ILMN_1679520	6	6p21.32	AGPAT1	1-acylglycerol-3-phosphate O-acyltransferase 1	10554	-0.6265	0.00282542
4920521	ILMN_3247681	2	2p11.2	C2orf68	chromosome 2 open reading frame 68	388969	-0.625522	0.00684082
2340653	ILMN_3248928	7	7q34	UBN2	ubinuclein 2	254048	-0.62283	0.00258316
4850538	ILMN_2363058	10	10q26.3	PAOX	polyamine oxidase	196743	-0.619452	0.0063969
5690519	ILMN_1773389	20	20q13.12	PLTP	phospholipid transfer protein	5360	-0.617784	0.0139651
1070487	ILMN_2386790	12	12p13.2	KLRC3	killer cell lectin like receptor C3	3823	-0.617697	0.000527403
650347	ILMN_2330243	7	7p22.3	NUDT1	nudix hydrolase 1	4521	-0.613673	0.0325728
3710450	ILMN_1814022	11	11p11.2	NR1H3	nuclear receptor subfamily 1 group H member 3	10062	-0.61193	0.00510452
2490053	ILMN_1768251	3	3p14.1	SLC25A26	solute carrier family 25 member 26	115286	-0.611869	0.0063244
5700424	ILMN_1669555	13	13q13.3	SUPT20H	SPT20 homolog, SAGA complex component	55578	-0.610592	0.00255078
2690070	ILMN_1724659	9	9q34.11	CIZ1	CDKN1A interacting zinc finger protein 1	25792	-0.608433	0.0112793
3140431	ILMN_2396198	19	19q13.12	APLP1	amyloid beta precursor like protein 1	333	-0.60664	0.0490302
2750356	ILMN_1809928	21	21q22.3	COL6A2	collagen type VI alpha 2 chain	1292	-0.60663	0.0363653
3870022	ILMN_1740752	8	8p11.21	GPAT4	glycerol-3-phosphate acyltransferase 4	137964	-0.60449	0.0070105
3130220	ILMN_1792455	3	3p21.31	TMEM158	transmembrane protein 158 (gene/pseudogene)	25907	0.601911	0.000310953
5670341	ILMN_1683905	19	19p13.3	MISP	mitotic spindle positioning	126353	0.603719	0.000330194
5090289	ILMN_1703852	13	13q33.3	EFNB2	ephrin B2	1948	0.604376	0.000970365
20273	ILMN_1732566	12	12q21.32	TMTC3	transmembrane and tetratricopeptide repeat containing 3	160418	0.605197	0.00754267
610703	ILMN_1807649	2	2q22.1	SPOPL	speckle type BTB/POZ protein like	339745	0.606404	0.00104887
4900386	ILMN_1765021	22	22q11.22	TOP3B	DNA topoisomerase III beta	8940	0.60715	0.00181143
3290753	ILMN_1691294	10	10q26.13	CTBP2	C-terminal binding protein 2	1488	0.608221	0.0116237
7650020	ILMN_1676336	3	3q26.31	NCEH1	neutral cholesterol ester hydrolase 1	57552	0.609501	0.000829984
5570324	ILMN_1800412	8	8p21.3	BMP1	bone morphogenetic protein 1	649	0.609599	0.000572208
6330307	ILMN_1696521	7	7p11.2	EGFR	epidermal growth factor receptor	1956	0.609767	0.00535541
4070053	ILMN_1763638	1	1p22.1	BCAR3	BCAR3, NSP family adaptor protein	8412	0.610259	0.00093304
3800161	ILMN_2163723	12	12q13.13	KRT7	keratin 7	3855	0.611597	0.00199092
3390563	ILMN_1781867	2	2q14.1	FOXD4L1	forkhead box D4 like 1	200350	0.611998	0.0215095
2490195	ILMN_1796712	1	1q21.3	S100A10	S100 calcium binding protein A10	6281	0.612693	3.98719e-05
110504	ILMN_3250273	15	15q21.2	TMOD2	tropomodulin 2	29767	0.612767	0.00115531
130142	ILMN_1737586	7	7q11.23	EIF4H	eukaryotic translation initiation factor 4H	7458	0.616647	0.0267186
7330639	ILMN_2366654	1	1q32.1	NR5A2	nuclear receptor subfamily 5 group A member 2	2494	0.618681	2.94101e-05
1940563	ILMN_1843198	1	1p31.3	AK4	adenylate kinase 4	205	0.620183	9.0379e-06
6370181	ILMN_1663145	16	16p13.11	NOMO3	NODAL modulator 3	408050	0.620306	0.0264456
6560725	ILMN_1656452	16	16p13.3	TEDC2	tubulin epsilon and delta complex 2	80178	0.620421	9.65047e-05
6760670	ILMN_1663493	NA	NA	NA	NA		0.62129	0.00973109
5890138	ILMN_1705458	1	1q44	TRIM58	tripartite motif containing 58	25893	0.621674	0.00238096
3870500	ILMN_1704418	5	5q13.2	FOXD1	forkhead box D1	2297	0.622926	0.000634704
2650041	ILMN_1808391	8	8p12	DUSP4	dual specificity phosphatase 4	1846	0.623119	0.0178146
7200097	ILMN_3234089	13	13q13.1	N4BP2L2	NEDD4 binding protein 2 like 2	10443	0.62603	0.0106296
6520494	ILMN_1808768	18	18q11.1	ROCK1	Rho associated coiled-coil containing protein kinase 1	6093	0.626551	0.0477652
1500192	ILMN_1779648	1	1q42.13	HIST3H2A	histone cluster 3 H2A	92815	0.628089	0.00484709
6110348	ILMN_1808163	11	11q13.2	C11orf24	chromosome 11 open reading frame 24	53838	0.632655	0.000861382
6510072	ILMN_1704961	17	17q25.3	ACTG1	actin gamma 1	71	0.633112	0.00147943
6270600	ILMN_2150402	8	8q21.3	TMEM64	transmembrane protein 64	169200	0.636287	0.046483
2760242	ILMN_1655577	21	21q22.11	TIAM1	T cell lymphoma invasion and metastasis 1	7074	0.636701	0.00219606
510520	ILMN_1676361	10	10q11.22-q11.23	ARHGAP22	Rho GTPase activating protein 22	58504	0.636731	0.00142894
780327	ILMN_1715672	2	2p25.1	HPCAL1	hippocalcin like 1	3241	0.639371	0.0178351
290730	ILMN_1651496	6	6p22.2	HIST1H2BD	histone cluster 1 H2B family member d	3017	0.640241	0.000141054
5670192	ILMN_1786361	17	17q12	RDM1	RAD52 motif containing 1	201299	0.640901	0.0106912
10332	ILMN_1687440	7	7q34	HIPK2	homeodomain interacting protein kinase 2	28996	0.646278	0.0222951
540681	ILMN_2046730	1	1q21.3	S100A10	S100 calcium binding protein A10	6281	0.647142	1.09736e-06
6840328	ILMN_1682738	15	15q22.33	SMAD3	SMAD family member 3	4088	0.647464	7.27776e-06
5360576	ILMN_3208140	NA	NA	NA	NA		0.649821	0.0463892
1430152	ILMN_1776653	X	Xp22.13	SCML1	Scm polycomb group protein like 1	6322	0.650284	0.00669272
3800402	ILMN_1668092	11	11q24.2	ESAM	endothelial cell adhesion molecule	90952	0.650518	0.00168744
3440025	ILMN_1730504	6	6q26	AGPAT4	1-acylglycerol-3-phosphate O-acyltransferase 4	56895	0.65168	0.0114829
1990132	ILMN_1717852	17	17q25.1	USH1G	USH1 protein network component sans	124590	0.651723	0.0212769
1580161	ILMN_1760849	16	16q12.1	NETO2	neuropilin and tolloid like 2	81831	0.653923	0.00266411
3120411	ILMN_2295511	16	16p13.3	LUC7L	LUC7 like	55692	0.65403	0.0101204
5090020	ILMN_2126239	1	1q22	SMG5	SMG5, nonsense mediated mRNA decay factor	23381	0.654392	0.000500485
780180	ILMN_2400583	X	Xp11.4	USP9X	ubiquitin specific peptidase 9 X-linked	8239	0.656139	0.000365866
2030041	ILMN_1757237	2	c("2p25.1", "2p24")	ASAP2	ArfGAP with SH3 domain, ankyrin repeat and PH domain 2	8853	0.667686	0.000190187
3440189	ILMN_1689456	3	3q13.31	ZBTB20	zinc finger and BTB domain containing 20	26137	0.669485	0.0118072
770706	ILMN_3291778	1	1q42.13	ABCB10	ATP binding cassette subfamily B member 10	23456	0.670637	0.0107554
4040296	ILMN_1659620	NA	NA	NA	NA		0.671139	4.53749e-05
360292	ILMN_3235325	NA	NA	NA	NA		0.671976	0.00612565
840626	ILMN_1765872	19	19q13.13-q13.2	SIPA1L3	signal induced proliferation associated 1 like 3	23094	0.676478	0.00134705
6220021	ILMN_3297392	4	4p14	UBE2K	ubiquitin conjugating enzyme E2 K	3093	0.679758	0.00906581
6620725	ILMN_1675523	19	19p13.3	PLPP2	phospholipid phosphatase 2	8612	0.679949	0.0105242
6900674	ILMN_2115218	13	13q34	ANKRD10	ankyrin repeat domain 10	55608	0.682445	0.00891579
510280	ILMN_2113938	1	1q25.2	TOR1AIP2	torsin 1A interacting protein 2	163590	0.686185	7.74873e-05
4230600	ILMN_3236898	17	17q25.3	PPP1R27	protein phosphatase 1 regulatory subunit 27	116729	0.687126	0.00169825
5670246	ILMN_1695475	7	7q21.11	SEMA3C	semaphorin 3C	10512	0.687283	0.0060288
4040097	ILMN_1735014	10	10p15.2	KLF6	Kruppel like factor 6	1316	0.687766	0.00360941
4050259	ILMN_1706265	4	4q32.3	TRIM61	tripartite motif containing 61	391712	0.688019	0.0111174
3800296	ILMN_1720595	6	6p21.2	MDGA1	MAM domain containing glycosylphosphatidylinositol anchor 1	266727	0.695973	0.00486356
540246	ILMN_2391231	15	15q21.1	SORD	sorbitol dehydrogenase	6652	0.696925	0.00201113
1940132	ILMN_1661589	11	11p15.5	CD151	CD151 molecule (Raph blood group)	977	0.697691	0.00952579
3060095	ILMN_1733756	6	6q13-q14.1	COL12A1	collagen type XII alpha 1 chain	1303	0.703693	0.00281501
5700088	ILMN_1751656	2	2p25.1	KLF11	Kruppel like factor 11	8462	0.703764	0.000161265
7160348	ILMN_1757287	15	15q21.2	MAPK6	mitogen-activated protein kinase 6	5597	0.710147	2.29167e-05
6400735	ILMN_1809783	10	10q23.2	FAM25A	family with sequence similarity 25 member A	643161	0.723894	0.00338449
4810730	ILMN_1658499	11	11p11.2	SYT13	synaptotagmin 13	57586	0.724907	0.000350327
3360669	ILMN_1657347	3	3q21.3	PODXL2	podocalyxin like 2	50512	0.733868	0.0013498
3520338	ILMN_1669479	7	7q32.2	MEST	mesoderm specific transcript	4232	0.734675	0.00779096
3520066	ILMN_1696546	7	7q21.13	FZD1	frizzled class receptor 1	8321	0.736437	0.00133625
6040600	ILMN_1652456	17	17q11.2	TMEM98	transmembrane protein 98	26022	0.745699	0.00127185
6420025	ILMN_2091310	11	11q13.3	ANO1	anoctamin 1	55107	0.748084	0.000120221
6380296	ILMN_1746368	3	3q25.1	SELENOT	selenoprotein T	51714	0.748252	1.47923e-05
2750367	ILMN_2098446	18	18q21.32	PMAIP1	phorbol-12-myristate-13-acetate-induced protein 1	5366	0.750052	0.000125729
4570181	ILMN_1768260	13	13q34	GAS6	growth arrest specific 6	2621	0.75247	0.000603546
3850341	ILMN_1718268	1	1p34.3	GJB4	gap junction protein beta 4	127534	0.757842	0.0142002
4760154	ILMN_2412384	8	8q22.1	CCNE2	cyclin E2	9134	0.761489	0.000295144
7320075	ILMN_3235803	9	9q21.11	AQP7P3	aquaporin 7 pseudogene 3	441432	0.761538	0.000175243
2340661	ILMN_1879031	NA	NA	NA	NA		0.762751	3.00022e-05
3800168	ILMN_1775708	12	12p13.31	SLC2A3	solute carrier family 2 member 3	6515	0.764679	6.04092e-05
2450047	ILMN_1655191	1	1p36.22	CASZ1	castor zinc finger 1	54897	0.769086	0.00186271
1570754	ILMN_1808779	11	11p13	CSTF3	cleavage stimulation factor subunit 3	1479	0.771248	7.23213e-06
6110025	ILMN_1668411	2	2q12.2	FHL2	four and a half LIM domains 2	2274	0.772982	1.63626e-07
2060136	ILMN_2411915	2	2q37.3	ATG4B	autophagy related 4B cysteine peptidase	23192	0.774055	0.0105134
380504	ILMN_1668760	16	16q22.1	HAS3	hyaluronan synthase 3	3038	0.796544	0.000609473
1260020	ILMN_2358919	2	2p23.3	TP53I3	tumor protein p53 inducible protein 3	9540	0.803098	0.000299124
4150014	ILMN_2371724	19	19q13.2	CEACAM1	carcinoembryonic antigen related cell adhesion molecule 1	634	0.806499	0.00352775
1440452	ILMN_1737561	13	13q13.1	N4BP2L2	NEDD4 binding protein 2 like 2	10443	0.816641	0.00308899
5570427	ILMN_2188722	NA	NA	NA	NA		0.819507	0.000849933
2490411	ILMN_2311166	3	3q21.2	ITGB5	integrin subunit beta 5	3693	0.829365	1.52747e-07
1770603	ILMN_1768469	11	11q12.1	TCN1	transcobalamin 1	6947	0.842717	0.000792249
3120370	ILMN_1714861	17	17p13.1	CD68	CD68 molecule	968	0.853892	0.000552672
4280048	ILMN_2308903	20	20q13.12	WFDC3	WAP four-disulfide core domain 3	140686	0.874301	0.000133296
1300470	ILMN_1679391	9	9q21.12	MAMDC2	MAM domain containing 2	256691	0.885883	1.111e-07
6510367	ILMN_1806023	1	1p32.1	JUN	Jun proto-oncogene, AP-1 transcription factor subunit	3725	0.88873	1.67233e-05
1300228	ILMN_1676665	NA	NA	NA	NA		0.895344	0.00298303
6480592	ILMN_2406035	18	18q11.2	LAMA3	laminin subunit alpha 3	3909	0.986593	1.69373e-06
5700753	ILMN_1716815	19	19q13.2	CEACAM1	carcinoembryonic antigen related cell adhesion molecule 1	634	1.0408	8.45376e-05
6020379	ILMN_1744109	NA	NA	NA	NA		1.05706	0.00185192
5910113	ILMN_1687301	5	5q14.2-q14.3	VCAN	versican	1462	1.06484	1.71098e-06
4010138	ILMN_1658575	2	2q24.1	GALNT5	polypeptide N-acetylgalactosaminyltransferase 5	11227	1.10524	1.17011e-07
6980612	ILMN_1794501	16	16q22.1	HAS3	hyaluronan synthase 3	3038	1.12487	8.68297e-09
10079	ILMN_2129572	1	1p21.3	F3	coagulation factor III, tissue factor	2152	1.14262	3.39536e-07
4830520	ILMN_1705814	12	12q13.13	KRT80	keratin 80	144501	1.18008	4.04364e-08
990372	ILMN_1651282	10	10q25.1	COL17A1	collagen type XVII alpha 1 chain	1308	1.1933	3.11426e-07
520682	ILMN_1784294	7	7q32.2	CPA4	carboxypeptidase A4	51200	1.42456	1.77687e-07
5960398	ILMN_1697220	6	6q14.3	NT5E	5'-nucleotidase ecto	4907	1.5153	1.52913e-07
Differentially expressed genes are reported in the siTRAP1 20% O2 vs. siNEG 20% O2 experimental condition. The lists of genes are sorted for logFC values (abs logFC ≥0.60, P-value <0.05).
